# Supplementary material for: Delayed, long-lived and globally-significant impacts of ocean-entering lahars
Source: Research Square preprint supplement (doi:10.21203/rs.3.rs-8432480/v1), 2026-01-16
Supplement: Supplementary file 1 [file 35dca4d7567e4190b5cd1767.xlsx]

## Sheet: Turbidity along transects
Year	Month	Day	Hour	Minute	Second	Turbidity (FNU)	Turbidity (FNU)	Turbidity (FNU)	Turbidity (FNU)	Turbidity (FNU)	Turbidity (FNU)	Turbidity (FNU)	Turbidity (FNU)	Turbidity (FNU)	Turbidity (FNU)	Turbidity (FNU)	Turbidity (FNU)	Turbidity (FNU)	Turbidity (FNU)	Turbidity (FNU)	Turbidity (FNU)	Turbidity (FNU)	Turbidity (FNU)	Turbidity (FNU)	Turbidity (FNU)	Turbidity (FNU)	Turbidity (FNU)	Turbidity (FNU)	Turbidity (FNU)	Turbidity (FNU)	Turbidity (FNU)	Turbidity (FNU)	Turbidity (FNU)	Turbidity (FNU)		A time series of turbidity point measurements (with 25 m spacing) extracted along a transect positioned 100 m offshore from the Wallibou River
2016	9	3	13	45	5	0.811776	0.777961	0.845663	0.851339	0.835327	0.752204	0.792932	0.793549	0.753517	0.843951	0.878502	0.837637	0.83994	0.803939	0.820704	0.763278	0.805151	0.761985	0.783616	0.821886	0.756135	0.799681	0.792315	0.795394	0.828932	0.797235	0.843379	0.786113	0.831264
2016	9	21	11	0	47	0.327871	0.332591	0.377538	0.368859	0.313439	0.332591	0.29353	0.368859	0.377538	0.48248	0.368859	0.430672	0.539381	0.414891	0.442205	0.532984	0.48949	0.406818	0.377538	0.445995	0.318296	0.406818	0.457204	0.445995	0.381824	0.332591	0.313439	0.478941	0.386074
2016	11	8	13	47	4	1.33439	1.19998	1.17401	1.08653	1.12907	1.12078	1.08782	1.16283	1.09892	1.21701	1.42504	1.50418	1.50592	1.57475	1.52097	1.36952	1.24937	1.18351	0.988772	0.692047	0.728434	0.567035	0.53504	0.544646	0.53407	0.589431	0.592932	0.595544	0.573397
2016	11	26	13	47	28	0.631944	0.633706	0.656978	0.670343	0.634585	0.611285	0.67773	0.675278	0.650179	0.668689	0.694618	0.717186	0.703277	0.676096	0.723267	0.725532	0.657822	0.704839	0.701712	0.69303	0.735994	0.756404	0.865185	0.766367	0.808063	0.783092	0.728539	0.757837	0.730037
2017	2	19	13	50	49	0.303721	0.390786	0.364742	0.372696	0.366076	0.367407	0.381822	0.411923	0.381822	0.42038	0.395839	0.380528	0.410704	0.462924	0.466227	0.502279	0.573281	No Data	0.609857	No Data	0.602217	0.565122	0.596202	0.519431	0.53509	0.570574	0.524373	0.543704	0.597927
2017	2	22	13	50	36	No Data	No Data	No Data	No Data	0.846881	0.762978	0.686576	0.730978	0.76162	0.750649	0.687343	0.762978	0.706217	0.728116	0.733826	0.822553	0.815081	0.821934	0.852238	0.750649	0.72668	0.775737	0.778391	0.792796	0.788247	0.797957	0.742995	0.818828	0.715803
2017	3	11	13	43	9	0.646709	0.659011	0.64588	0.744467	0.715544	0.71332	0.741633	0.765333	0.768065	0.730893	0.756374	0.700567	0.693707	0.640042	0.746584	0.850722	No Data	No Data	No Data	0.769427	0.695238	0.864485	0.853134	0.788865	0.946425	1.00609	1.03401	1.07789	0.959118
2017	4	7	13	51	37	0.51055	0.459202	0.506978	0.496117	0.734314	0.768883	0.707852	0.879457	0.775125	0.753882	0.739711	0.817219	0.926803	0.930428	1.00173	0.967944	0.848782	0.932685	0.982896	0.933136	0.948747	0.976948	1.03902	1.0571	0.938076	0.942094	1.07446	1.00545	1.02743
2017	4	23	13	45	11	0.667183	0.681234	0.74599	0.714732	0.768479	0.805344	0.78151	0.82257	0.785113	0.861816	0.811792	0.741617	0.724947	0.713013	0.708984	0.753573	0.770056	0.702016	0.715303	0.670879	0.678813	0.720994	0.704929	0.718724	0.728876	0.777887	0.796315	0.82257	0.824997
2017	4	25	13	52	2	0.361114	0.381641	0.421404	0.380522	0.364594	0.466919	0.504411	0.471636	0.474446	0.494609	0.522641	0.554949	0.510557	0.487366	0.566097	0.558157	0.596021	0.560551	0.537791	0.524345	0.577797	0.529427	0.470696	0.502642	0.548476	0.625143	0.549289	0.593024	0.645366
2017	4	27	13	51	40	0.743877	0.857832	0.750338	0.869656	0.872094	0.852846	0.850339	0.860806	0.873554	0.921502	0.903068	0.991568	0.974721	0.994066	0.959691	0.965306	0.924228	0.890362	0.861301	0.862783	0.9012	0.852846	0.820052	0.811068	0.895566	0.885121	0.867209	0.773857	0.743286
2017	5	10	13	45	45	0.443826	0.443826	0.492329	0.416291	0.544047	0.494947	0.450491	0.395694	0.555083	0.517963	0.581016	0.479938	0.530343	0.473633	0.412236	0.563605	0.599356	0.59428	0.644486	0.595008	0.587686	0.642477	0.63165	0.622009	0.640462	0.618528	No Data	No Data	No Data
2017	6	1	13	47	11	0.758595	0.693095	0.824305	0.856431	0.869566	0.857412	0.831966	0.78793	0.81187	0.827379	0.820701	0.868118	0.923979	0.92935	0.89888	0.890955	0.910845	0.909016	0.931133	1.025	0.897022	0.933799	0.920377	0.869566	0.945691	0.842553	0.816559	0.860348	0.820701
2017	6	22	20	14	23	0.078979	0.18272	0.132085	0.085951	0.082478	0.089399	0.1939	0.068325	0.228559	0.16251	0.109576	0.210203	0.16251	0.144488	0.112858	0.23368	0.141417	0.128934	0.112858	0.071903	0.253646	0.128934	0.179884	0.116117	0.116117	0.057425	0.06472	0.156578	0.122568
2017	6	27	13	47	46	0.850054	0.879062	0.92429	0.936682	0.97103	0.927521	0.944389	1.00993	0.995595	0.974084	0.968403	0.996445	0.982752	0.936227	0.891707	0.901293	0.849543	0.907933	0.906042	0.874141	0.839776	0.803122	0.832492	0.788789	0.821424	0.865201	0.884925	0.903196	0.853616
2017	7	5	13	53	29	0.672358	0.633189	0.655196	0.62956	0.588818	0.616301	0.62664	0.632465	0.530288	0.584893	0.700119	0.681756	0.671003	0.682422	0.785648	0.796267	0.758606	0.689695	0.743741	0.641094	0.71982	0.755661	0.777711	0.716685	0.692972	0.690352	0.700119	0.671003	0.727279
2017	7	6	13	47	44	0.81401	0.799889	0.884572	0.856763	0.873277	0.819898	0.859793	0.840901	0.964656	0.827321	0.865816	0.850665	0.883597	0.851684	0.914679	0.883109	0.928617	0.881642	0.884085	0.869805	0.894258	0.78603	0.792718	0.803174	0.790496	0.843999	0.830478	0.820431	0.818297
2017	7	8	13	49	24	0.707256	0.678012	0.600558	0.643932	0.632355	0.699304	0.736353	0.769172	0.867216	0.881464	0.839859	0.830336	0.89267	0.775215	0.732277	0.849257	0.787676	0.709682	0.672249	0.631667	0.730522	0.666432	0.72108	0.757479	0.728762	0.706648	0.724046	0.717503	0.742706
2017	7	10	13	48	16	0.729034	0.735281	0.734037	0.733413	0.750031	0.669804	0.733413	0.735281	0.743926	0.727147	0.745764	0.770957	0.720182	0.714426	0.718908	0.708616	0.763262	0.796357	0.8148	0.79295	0.732165	0.724623	0.76207	0.769779	0.776815	0.825199	0.849757	0.812591	0.807037
2017	7	28	13	50	0	0.851652	0.904683	0.903767	0.935181	0.919181	0.913323	0.926332	1.02966	1.02172	0.97008	0.937379	1.02808	0.999544	0.937818	0.987628	0.937379	0.919181	0.92811	0.968813	0.955179	0.914679	0.898715	0.886638	0.859949	0.871982	0.877216	0.894092	0.878636	0.869112
2017	7	30	13	48	33	0.163657	0.145556	0.181101	0.134358	0.11509	No Data	0.196279	0.126744	0.047581	0.029076	0.284178	0.07618	No Data	0.128659	No Data	0.08254	0.11312	0.305905	0.156498	0.271526	0.243703	0.267236	0.262908	0.192947	0.179385	0.286946	0.132466	0.13812	0.172458
2017	8	21	13	52	11	0.731901	0.690078	0.706543	0.766232	0.862683	0.797816	0.778723	0.79362	0.765684	0.886619	0.887081	0.852113	0.906677	0.826494	0.870747	0.853563	0.820448	0.816897	0.798861	0.796245	0.686359	0.749013	0.762383	0.817913	0.889845	0.911164	0.908475	0.838433	0.879658
2017	8	27	13	49	48	0.430609	0.426694	0.41477	0.467331	0.42571	0.500835	0.460003	0.46642	0.4563	0.423738	0.473662	0.467331	0.484344	0.471861	0.554542	0.548303	0.523443	0.4563	0.527529	0.562244	0.511837	0.497405	0.481693	0.503394	0.5412	0.457228	0.485225	0.554542	0.494818
2017	9	4	13	52	6	0.333941	0.323607	0.323607	0.321282	0.349607	0.364806	0.209375	0.204972	0.241873	0.309491	0.191518	0.225187	0.251351	0.313057	0.215184	0.269777	0.248662	0.267187	0.30349	0.336209	0.364806	0.363735	0.402933	0.414718	0.470855	0.420513	0.430972	0.48209	0.487197
2017	9	10	13	50	6	0.457915	0.435489	0.506011	0.500968	0.447754	0.531353	0.444949	0.44401	0.434534	0.458829	0.412066	0.490738	0.550974	0.479433	0.493313	0.461562	0.503495	0.540857	0.496729	0.506011	0.550974	0.491598	0.46247	0.477672	0.545549	0.575125	0.493313	0.518419	0.587547
2017	9	14	13	51	33	1.0644	1.05352	1.03594	1.05917	1.06199	1.06038	1.03552	1.02598	1.05149	1.10142	1.07873	1.10026	1.10798	1.14735	1.135	0.989854	1.00277	0.970116	0.978944	0.996766	1.00362	1.00405	0.965667	0.981575	0.944438	1.04005	1.00746	1.00618	0.992452
2017	9	17	13	51	56	0.791663	0.806818	0.806301	0.833184	0.791135	0.807851	0.809397	0.846982	0.796403	0.80371	0.849419	0.798499	0.795878	0.810426	0.874754	0.826685	0.9074	0.85475	0.827187	0.891941	0.81094	0.808367	0.79272	0.81248	0.811967	0.749677	0.793247	0.769093	0.728498
2017	10	5	13	53	8	0.56348	0.553708	0.634846	0.761614	0.699094	0.727451	0.908136	0.899348	0.845316	0.859431	0.84007	0.850051	0.876018	0.936038	0.903755	0.930959	0.871906	0.879655	0.898022	0.857097	0.907699	0.887324	0.913795	0.933925	0.964648	0.984794	0.969931	0.795108	0.748055
2017	10	6	13	53	59	0.885448	0.796439	0.839295	0.940111	0.917605	0.878274	0.89866	0.896787	0.914403	0.93432	0.853848	0.877794	0.92034	0.911648	0.851858	0.946303	0.916234	0.900062	0.894438	0.894438	0.883064	0.858799	0.873453	0.863716	0.87006	0.852854	0.911648	0.926684	0.848362
2017	10	9	13	54	3	0.850646	0.848549	0.849074	0.851693	0.882405	0.886406	0.9022	0.907069	0.953267	0.921021	0.960112	0.915278	0.937071	1.0429	1.06098	1.11767	1.28697	1.46855	1.3808	1.35388	1.271	1.24928	1.20936	1.03624	0.965548	0.974532	0.971847	0.990032	0.993974
2017	10	12	13	52	37	0.449577	0.422526	0.473448	0.438723	0.449577	0.440713	0.490903	0.555615	0.527601	0.528446	0.509561	0.53848	0.501643	0.54343	0.51391	0.472513	0.539308	0.59066	0.577674	0.54425	0.487274	0.501643	0.483622	0.523359	0.492707	0.609237	0.564384	0.626527	0.658981
2017	10	13	13	55	37	0.579181	0.587935	0.590299	0.594217	0.606574	0.571915	0.540134	0.53058	0.586354	0.608861	0.619413	0.642109	0.646401	0.623135	0.613407	0.636338	0.596555	0.548678	0.647113	0.608861	0.598108	0.612652	0.614162	0.599656	0.594997	0.644974	0.584768	0.57677	0.551215
2017	10	20	15	12	22	0.96134	0.904392	0.978431	0.990935	1.00135	0.960536	0.886515	0.937719	0.925648	0.930248	1.01467	0.975277	0.969332	0.954486	0.978825	0.942252	0.941841	0.853127	0.903098	0.974882	0.926067	0.981182	0.990935	0.95933	0.96134	0.986267	1.15198	0.90007	0.960536
2017	10	21	13	54	27	0.833062	0.890155	0.839362	0.847468	0.913702	0.946345	0.979244	0.97455	1.04623	0.980283	0.972456	0.965082	1.02134	1.04382	1.04527	1.05438	1.08399	1.09412	1.14819	1.14862	1.12439	1.03118	1.03801	0.949589	0.943088	0.894809	1.08445	1.18597	1.15558
2017	11	2	13	54	6	0.245244	0.302895	0.28347	0.264726	0.302895	0.335813	0.407075	0.363108	0.348402	0.366719	0.378576	0.367917	0.321594	0.357032	0.390165	0.348402	0.367917	0.408183	0.378576	0.353352	0.251321	0.3294	0.403737	0.350883	0.318965	0.372682	0.325512	0.296044	0.339623
2017	11	8	15	9	18	No Data	No Data	No Data	No Data	No Data	No Data	No Data	No Data	No Data	No Data	No Data	0.689158	0.826758	0.769405	0.779688	0.715388	0.732688	0.789256	0.861844	0.811246	0.812327	0.844001	0.745957	0.793156	0.387246	0.484581	0.414665	0.464558	0.425239
2017	11	9	13	53	47	0.584617	0.456231	0.519229	0.540444	0.582206	0.460266	0.649035	0.616579	0.621112	0.621864	0.653326	0.609713	0.63817	0.751862	0.722623	0.672264	0.571643	0.630073	0.633768	0.547339	0.533463	0.525502	0.490552	0.483861	0.460266	0.466263	0.462273	0.414081	0.460266
2017	11	20	13	54	44	0.566066	0.616598	0.625257	0.600515	0.57124	0.587318	0.594779	0.61739	0.61501	0.62055	0.599699	0.628374	0.575515	0.556455	0.603768	0.648244	0.663822	0.595602	0.622908	0.506704	0.599699	0.604578	0.577216	0.603768	0.583131	0.594779	0.598882	0.559969	0.504772
2017	11	25	13	54	22	0.469526	0.437162	0.450975	0.418534	0.444644	0.415177	0.475569	0.45723	0.465459	0.430663	0.452022	0.476569	0.429572	0.437162	0.461361	0.478565	0.528029	0.456193	0.456193	0.490386	0.462388	0.442517	0.395734	0.444644	0.452022	0.430663	0.478565	0.472556	0.458266
2017	11	28	13	54	41	0.409842	0.395379	0.42852	0.418096	0.408652	0.381758	0.372898	0.363882	0.430809	0.405066	0.491179	0.476714	0.471452	0.475666	0.461849	0.473563	0.459691	0.467205	0.503276	0.486057	0.458609	0.458609	0.494229	0.426221	0.461849	0.495241	0.492197	0.507249	0.409842
2017	11	29	13	55	53	0.459727	0.456475	0.471485	0.481953	0.50628	0.498292	0.486085	0.513174	0.523837	0.467239	0.460807	0.471485	0.471485	0.559161	0.550081	0.539918	0.548247	0.528615	0.572513	0.599988	0.627811	0.616515	0.590692	0.636536	0.650541	0.593242	0.591543	0.556453	0.618142
2017	12	3	13	55	25	No Data	No Data	No Data	No Data	No Data	No Data	No Data	No Data	No Data	No Data	No Data	No Data	0.675836	0.787191	0.767684	0.685361	0.840853	0.833352	0.814541	0.611175	0.572873	0.486372	0.436774	0.452364	0.458908	0.471759	0.492515	0.542115	0.459991
2017	12	10	13	56	49	0.306634	0.2577	0.272894	0.281137	0.277856	0.333848	0.297225	0.264511	0.349783	0.321934	0.342602	0.318911	0.287635	0.432584	0.48681	0.538074	0.451672	0.500888	0.508319	0.475725	0.444595	0.475725	0.433798	0.344046	0.376185	0.354044	0.398708	0.421535	0.415294
2017	12	14	13	56	34	0.412313	0.589325	0.554746	0.473651	0.51131	0.535041	0.536096	0.580633	0.557795	0.5382	0.517885	0.546534	0.540295	0.554746	0.587404	0.628232	0.572794	0.615551	0.591238	0.583545	0.603523	0.616466	0.471281	0.685417	0.576727	0.52653	0.54134	0.564844	0.516794
2017	12	21	13	55	38	0.552972	0.605464	0.575941	0.504969	0.519526	0.537429	0.549354	0.524294	0.502998	0.485952	0.535572	0.572468	0.542965	0.52619	0.52619	0.52619	0.497043	0.56014	0.598849	0.613629	0.654345	0.671503	0.664103	0.539281	0.611192	0.59968	0.575941	0.587933	0.578532
2018	1	2	13	56	47	0.451297	0.467365	0.455938	0.486248	0.487338	0.558713	0.538254	0.535269	0.630517	0.686852	0.715382	0.711702	0.724851	0.729174	0.765467	0.774903	0.784207	0.751054	0.768853	0.746178	0.71244	0.697516	0.661753	0.737024	0.665744	0.708	0.685313	0.728455	0.695246
2018	1	4	15	0	22	0.152456	0.235309	0.19565	0.172734	0.247844	0.230524	0.252464	0.287945	0.302012	0.323728	0.33684	0.209231	0.285083	0.266069	0.146774	0.200787	0.263078	0.331636	0.355892	0.325054	0.289369	0.315694	0.289369	0.287945	0.304778	0.269042	0.246295	0.202488	0.33684
2018	1	23	14	56	29	0.510288	0.537699	0.610332	0.600052	0.579748	0.480433	0.526898	0.592826	0.578092	0.637137	0.506527	0.522335	0.546542	0.564666	0.588771	0.525077	0.549168	0.564666	0.555246	0.618891	0.600052	0.569739	0.553516	0.580575	0.507469	0.552649	0.527807	0.572258	0.507469
2018	1	31	14	55	30	0.51887	0.437062	0.504803	0.489387	0.583472	0.505753	0.499073	0.561614	0.5067	0.52348	0.52987	0.484477	0.553846	0.667039	0.640731	0.747368	0.833331	0.809124	0.857272	0.957417	1.00502	0.8519	0.862604	0.868952	0.895852	0.935483	0.822176	0.683264	0.592471
2018	2	1	14	55	48	0.461302	0.335334	0.385554	0.218254	0.433296	0.308227	0.244857	0.377887	0.436263	0.348361	0.271457	0.272819	0.428313	0.468775	0.465985	0.35648	0.572347	0.68948	0.700086	0.595671	0.610229	0.509836	0.51582	0.47155	0.687589	0.496786	0.508975	0.491477	0.546413
2018	2	2	13	57	52	0.418663	0.448894	0.420963	0.367848	0.425533	0.40346	0.412868	0.370385	0.377921	0.444523	0.375421	0.420963	0.40936	0.427803	0.39024	0.381647	0.423253	0.410532	0.430063	0.456457	0.485681	0.479551	0.462855	0.391456	0.445619	0.468129	0.489729	0.489729	0.457529
2018	2	3	13	57	56	0.547697	0.467482	0.458874	0.46427	0.36401	0.484294	0.557741	0.521279	0.572037	0.577307	0.612067	0.61371	0.564935	0.522244	0.487389	0.57027	0.492507	0.535588	0.532756	0.549536	0.573799	0.523208	0.533701	0.556835	0.638605	0.574678	0.657944	0.689095	0.724235
2018	2	9	13	58	10	0.350693	0.396324	0.36844	0.406838	0.450102	0.432782	0.383176	0.389194	0.456454	0.491087	0.553481	0.586819	0.562219	0.494038	0.460647	0.381964	0.414871	0.47201	0.567397	0.603993	0.536493	0.554361	0.418276	0.522703	0.503762	0.450102	0.477096	0.459602	0.490099
2018	2	10	13	58	57	0.647979	0.634337	0.602644	0.606063	0.586121	0.628627	0.611998	0.629446	0.67436	0.669787	0.626162	0.644797	0.626162	0.655859	0.702547	0.656641	0.690836	0.6736	0.758034	0.763987	0.686386	0.639188	0.66518	0.675876	0.631897	0.678144	0.644797	0.671315	0.688615
2018	2	21	13	58	32	0.536324	0.507653	0.514478	0.534458	0.538183	0.543724	0.622493	0.657433	0.564466	0.693294	0.649845	0.608731	0.574122	0.649081	0.62409	0.678184	0.712881	0.727851	0.722449	0.683262	0.76126	0.710812	0.753553	0.604621	0.644475	0.60214	0.642158	0.660442	0.576727
2018	2	27	13	59	4	0.490858	0.540438	0.488967	0.580355	0.537846	0.474571	0.557416	0.533499	0.499286	0.44353	0.503912	0.446615	0.493682	0.477481	0.437306	0.490858	0.528236	0.536111	0.519353	0.508499	0.625868	0.750765	0.653408	0.605485	0.635435	0.566539	0.614633	0.62809	0.552377
2018	3	1	13	59	19	0.584014	0.542284	0.564812	0.557976	0.537845	0.547564	0.574912	0.551926	0.594587	0.564812	0.558835	0.54581	0.540513	0.562258	0.576578	0.610482	0.654994	0.620584	0.585654	0.596197	0.657894	0.655721	0.612048	0.628238	0.625952	0.60576	0.604177	0.653539	0.65135
2018	3	10	13	58	35	0.550071	0.643686	0.595611	0.599576	0.7036	0.640748	0.541378	0.688146	0.552652	0.59242	0.528078	0.627344	0.550932	0.605863	0.690184	0.544871	0.572886	0.535211	0.590015	0.508901	0.575365	0.654574	0.73656	0.787409	0.648792	0.785075	0.804665	0.749649	0.764291
2018	3	18	13	59	55	0.285689	0.314581	0.343163	0.230287	0.389033	0.259513	0.309205	0.325163	0.294116	0.40158	0.27999	0.288513	0.272774	0.303771	0.379712	0.303771	0.274226	0.164174	0.358099	0.425799	0.410518	0.48477	0.49431	0.542253	0.332956	0.269858	0.299655	0.302403	0.285689
2018	3	19	13	59	56	No Data	No Data	0.288565	0.263061	0.277986	0.280651	0.386903	0.379305	0.435222	0.321476	0.496371	0.538486	0.354666	0.45545	0.401771	0.474936	0.491092	0.399673	0.356956	0.254726	0.371593	0.415206	0.354666	0.409048	0.482176	0.436203	0.462025	0.366013	0.478569
2018	3	30	14	0	18	0.602086	0.717468	0.739187	0.771823	0.774562	0.818466	0.803446	0.782711	0.682459	0.789159	0.734554	0.747787	0.640594	0.676106	0.672905	0.652667	0.670331	0.62896	0.6185	0.682459	0.611421	0.57693	0.585936	0.563921	0.528776	0.509474	0.516265	0.436397	0.536148
2018	4	13	14	0	32	0.800975	0.774855	0.614142	0.653032	0.721637	0.682034	0.648391	0.69818	0.622546	0.656324	0.623241	0.659599	0.626013	0.570936	0.596231	0.588907	0.631516	0.660903	0.664801	0.653692	0.632201	0.635611	0.654351	0.717491	0.656324	0.695724	0.619758	0.685172	0.660251
2018	5	2	14	1	4	0.412975	0.292874	0.368486	0.359766	0.387578	0.431481	0.521914	0.515408	0.461247	0.319755	0.296626	0.314973	0.414954	0.385491	0.523529	0.468435	0.429563	No Data	No Data	No Data	No Data	No Data	No Data	No Data	No Data	No Data	No Data	No Data	No Data
2018	5	12	14	2	3	1.18525	1.1352	1.09422	1.11728	1.05166	1.03192	1.0433	1.03007	1.02301	1.1429	1.1469	1.07881	1.0774	0.980663	1.0204	0.998836	0.910206	0.926628	0.938625	0.896036	0.936157	0.911481	0.919932	0.932442	0.873605	0.905939	0.962503	0.87137	0.862359
2018	5	16	14	1	21	0.69493	0.768476	0.801823	0.644606	0.659231	0.672223	0.701091	0.667707	0.667707	0.749448	0.718619	0.689331	0.628228	0.569269	0.58738	0.615638	0.522922	0.659231	0.632366	0.803918	0.786431	0.736832	0.745461	0.798139	0.904243	0.863069	0.803918	0.72691	0.801823
2018	6	6	14	3	15	0.82592	0.817981	0.838438	0.915876	0.968179	0.945595	0.969052	0.922372	0.97384	0.980756	0.894145	0.942898	1.02033	1.00956	1.0133	1.11424	1.03424	1.1701	1.11009	1.12547	1.06344	1.20526	1.18156	1.13733	1.06698	1.09451	1.05234	1.06619	1.11122
2018	6	7	14	2	38	0.838992	0.791371	0.836966	0.82158	0.906117	0.896822	0.864336	0.892132	0.916215	0.940024	0.885042	0.895887	0.869203	0.955371	0.913474	0.857467	0.963155	0.936475	0.962294	0.901949	0.911641	0.865312	0.894481	0.93603	0.885991	0.947514	0.792454	0.850532	0.888359
2018	6	12	14	2	31	1.24237	1.19128	1.04664	1.05879	0.968569	1.12742	1.08455	1.09251	1.01783	1.07808	1.10972	1.30485	1.27484	1.3439	1.27085	1.26685	1.19476	1.2894	1.22267	1.24742	1.30485	1.30354	1.24405	1.2356	1.13689	1.06073	1.15061	1.03354	1.03114
2018	7	22	14	4	39	0.827513	0.829001	0.814487	0.782922	0.824529	0.881057	0.800696	0.931033	1.05674	0.918396	0.931033	0.889767	0.856688	0.951104	1.08893	0.932761	0.899278	0.861437	0.795517	0.832952	0.871312	0.897024	No Data	No Data	No Data	No Data	No Data	No Data	No Data
2018	7	23	14	4	21	0.607151	0.641213	0.672192	0.656587	0.660997	0.572421	0.581842	0.531501	0.616701	0.622758	0.514736	0.581123	0.759441	0.709835	0.862286	0.725861	0.738729	0.765847	0.759977	0.691003	0.684394	0.84118	0.800018	0.784701	0.74753	0.748077	0.786764	0.843081	0.790358
2018	9	1	14	5	13	0.671056	0.783991	0.813701	0.764172	0.783448	0.743157	0.823495	0.807967	0.772502	0.892727	0.930418	0.968958	0.782361	0.810579	0.728559	0.732093	0.683883	0.718437	0.681976	0.695202	0.601688	0.741422	0.756865	0.700784	0.76081	0.74431	0.805344	0.796883	0.68831
2018	9	10	14	6	8	0.049338	0.114718	No Data	0.159272	0.075415	No Data	0.302774	0.140926	0.213393	0.137513	0.360381	0.250026	0.289163	0.420926	0.356006	0.433368	0.365797	0.438076	0.457403	0.370089	0.393075	0.276458	0.173778	0.230642	0.229228	0.413119	0.311246	0.317212	0.437137
2018	9	11	14	5	33	0.518064	0.549706	0.424303	0.41026	0.486131	0.539358	0.589291	0.459151	0.374921	0.43346	0.446904	0.411208	0.498327	0.483658	0.399716	0.471122	0.493481	0.453937	0.481174	0.429816	0.457418	0.423378	0.445131	0.46517	0.400683	0.405493	0.46517	0.486131	0.454809
2018	9	15	14	6	7	0.373267	0.362747	0.306604	0.306604	0.410425	0.269634	0.236568	0.338807	0.353089	0.236568	0.405557	0.383576	0.31485	0.481901	0.534317	0.311332	0.380505	0.454101	0.441466	0.279765	No Data	No Data	No Data	No Data	No Data	No Data	No Data	No Data	No Data
2018	9	22	14	5	59	0.61864	0.660285	0.625788	0.660285	0.613385	0.609413	0.611403	0.636667	0.578015	0.562364	0.609413	0.587754	0.612725	0.629651	0.675332	0.746573	0.73749	0.659676	0.469071	0.536528	0.594611	0.609413	0.753959	0.743382	0.659065	0.626434	0.649214	0.724993	0.751857
2018	10	6	14	6	19	0.597479	0.740727	0.674003	0.688456	0.633436	0.659878	0.699395	0.704476	0.674668	0.700032	0.708259	0.668662	0.575874	0.737134	0.616835	0.716379	0.751387	0.746079	0.758978	0.786269	0.774468	0.80657	0.768201	0.766482	0.786826	0.789603	0.769345	0.854603	0.801687
2018	10	15	14	6	30	0.429427	0.447065	0.397582	0.437339	0.458505	0.566708	0.524955	0.494076	0.413234	0.525788	0.438319	0.479767	0.502831	0.281508	0.507156	0.461327	0.529109	0.501961	0.510591	0.541387	0.429427	0.429427	0.460388	0.466926	0.485178	0.581973	0.531587	0.475216	0.547025
2018	10	26	14	16	46	0.34025	0.402399	0.452317	0.503057	0.440991	0.36844	0.343716	0.335591	0.324948	0.215819	0.127838	0.148826	0.239092	0.21133	0.320144	0.309166	0.299201	0.239092	0.388872	0.376063	0.336759	0.410551	0.390976	0.503057	0.463406	0.438121	0.51399	0.554127	0.270725
2018	11	5	14	15	28	0.313966	0.236805	0.253786	0.347344	0.229553	0.21772	0.25656	0.225149	0.242531	0.255175	0.302749	0.333308	0.342708	0.467249	0.390464	0.381909	0.381909	0.267503	0.334493	0.349646	0.21772	0.306516	0.275554	0.222191	0.246782	0.288689	0.318871	0.312731	0.382986
2018	11	17	14	7	57	0.402388	0.503379	0.482316	0.413626	0.423536	0.40916	0.431117	0.511765	0.498663	0.451158	0.484265	0.400111	0.507122	0.540586	0.528162	0.537065	0.548428	0.479378	0.479378	0.487175	0.517286	0.514533	0.542338	0.5182	0.580379	0.484265	0.519113	0.569651	0.584452
2018	11	29	14	12	36	0.356621	0.299781	0.3679	0.444753	0.46893	0.416522	0.389738	0.466298	0.458321	0.488274	0.382045	0.329862	0.378935	0.430828	0.388209	0.341743	0.413614	0.400319	0.472855	0.460993	0.422291	0.516648	0.578024	0.608418	0.580173	0.519046	0.550448	0.568252	0.498312
2018	12	11	14	7	29	0.412926	0.390882	0.369161	0.3546	0.3492	0.394622	0.431766	0.444337	0.384588	0.3492	0.406896	0.466456	0.409316	0.358613	0.412926	0.382049	0.517076	0.483512	0.260365	0.385853	0.382049	0.435224	0.440939	0.446591	0.43866	0.48141	0.367855	0.4177	0.379497
2018	12	15	14	8	30	0.548902	0.576111	0.564076	0.497555	0.589686	0.542132	0.561262	0.540182	0.543104	0.639355	0.584294	0.600318	0.572435	0.602071	0.576111	0.678284	0.528337	0.575194	0.568735	0.574276	0.619315	0.586996	0.675199	0.60903	0.621011	0.543104	0.65315	0.523325	0.583391
2018	12	29	14	9	23	0.615466	0.582981	0.603187	0.641603	0.621108	0.624308	0.722011	0.639274	0.663656	0.654629	0.643922	0.655387	0.6007	0.682765	0.779174	0.745353	0.692812	0.629075	0.71997	0.656143	0.678408	0.693523	0.740752	0.599036	0.610586	0.609768	0.613031	0.676218	0.470352
2019	1	3	14	9	18	0.405446	0.41464	0.41464	0.41464	0.433657	0.503565	0.486923	0.474859	0.509319	0.55944	0.598172	0.544425	0.627537	0.580816	0.57151	0.569801	0.547995	0.54532	0.527151	0.485928	0.404285	0.474859	0.498723	0.607859	0.53175	0.530833	0.5026	0.579977	0.595725
2019	1	4	14	8	34	0.468856	0.565427	0.634871	0.485048	0.588575	0.59795	0.557495	0.599806	0.540256	0.601657	0.588575	0.560482	0.573248	0.60258	0.577119	0.533	0.539225	0.536121	0.488456	0.499661	0.490715	0.483908	0.487322	0.569351	0.542312	0.487322	0.591404	0.594218	0.630491
2019	1	7	14	10	24	0.556203	0.557297	0.530443	0.463429	0.444947	0.629038	0.570255	0.556203	0.504622	0.522358	0.597352	0.582921	0.658182	0.622252	0.648004	0.610433	0.668191	0.646134	0.581877	0.62517	0.517684	0.61932	0.579781	0.577678	0.692078	0.660014	0.61242	0.555108	0.646134
2019	1	8	14	10	8	0.438964	0.35992	0.417076	0.449023	0.415898	0.341181	0.425247	0.412349	0.409969	0.35992	0.406379	0.45998	0.480198	0.41116	0.494622	0.42871	0.363848	0.484359	0.418251	0.45998	0.407578	0.446804	0.425247	0.502696	0.450129	0.496652	0.457807	0.443459	0.479152
2019	1	13	14	9	7	0.414464	0.412091	0.433067	0.376408	0.429629	0.371287	0.387748	0.519362	0.351612	0.423848	0.430778	0.391473	0.461963	0.4466	0.340799	0.433067	0.473731	0.458708	0.459796	0.524204	0.466272	0.465199	0.44993	0.466272	0.447713	0.439877	0.396399	0.354279	0.421518
2019	1	26	14	5	52	0.478969	0.461038	0.515174	0.520298	0.5294	0.490954	0.489876	0.56153	0.535384	0.494176	0.536375	0.566238	0.56811	0.586492	0.598124	0.638292	0.612981	0.644857	0.656972	0.696392	0.665699	0.735499	0.626619	0.650542	0.663331	0.65135	0.627461	0.63581	0.639116
2019	2	3	14	8	8	0.364429	0.284737	0.321418	0.377996	0.42341	0.431158	0.424524	0.412138	0.354332	0.329515	0.427851	0.346625	0.384046	0.410998	0.31869	0.296313	0.198582	0.307626	0.400618	0.430058	0.342728	0.377996	0.358142	0.28911	0.354332	0.407561	0.369404	0.329515	0.271385
2019	2	4	14	10	36	No Data	No Data	No Data	No Data	No Data	0.13764	0.256462	0.184775	0.29523	0.200676	0.23263	0.200676	0.212694	0.166471	0.143546	No Data	0.102716	0.143546	0.195434	0.157051	No Data	0.153232	0.166471	0.166471	0.20929	0.286548	0.193673	0.15895	0.147444
2019	2	15	14	10	31	0.601356	0.573163	0.610983	0.588262	0.563734	0.60939	0.569753	0.527116	0.589915	0.65096	0.614948	0.626683	0.700869	0.653186	0.592386	0.684918	0.586604	0.576554	0.586604	0.603777	0.625132	0.616527	0.56546	0.625908	0.629002	0.691209	0.701553	0.689816	0.669981
2019	2	17	14	10	21	0.486971	0.451106	0.456096	0.44809	0.412638	0.43996	0.455102	0.443024	0.476557	0.442005	0.484151	0.548107	0.558081	0.533663	0.521479	0.538804	0.454106	0.534524	0.521479	0.518833	0.49442	0.550617	0.43996	0.556431	0.507215	0.545585	0.579896	0.558904	0.548944
2019	3	2	15	17	2	0.856385	0.819021	0.743876	0.743303	0.737546	0.774085	0.772443	0.759714	0.901573	0.787614	0.730568	0.666589	0.724104	0.751843	0.71338	0.703692	0.798245	0.733485	0.776268	0.819021	0.812337	0.725873	0.757475	0.769146	0.763058	0.701246	0.701859	0.69323	0.781695
2019	3	18	13	57	3	1.17121	1.06642	1.14643	1.20686	1.09294	1.15775	1.24169	1.18749	1.2811	1.26746	1.23635	1.15775	1.10163	1.21374	1.29914	1.25762	1.28666	1.27377	1.28284	1.25656	1.25621	1.24843	1.47313	1.4283	1.37521	0.85658	0.657207	0.671202	0.559577
2019	3	20	14	9	55	0.522464	0.537114	0.559159	0.618478	0.630189	0.522464	0.585551	0.597219	0.661404	0.65946	0.656857	0.670395	0.686127	0.69046	0.705691	0.648982	0.679255	0.711084	0.663342	0.686127	0.697818	0.676106	0.730471	0.736803	0.621947	0.556063	0.595049	0.610773	0.622638
2019	3	21	13	54	47	0.266424	0.230423	0.21985	0.263638	0.292131	No Data	No Data	No Data	No Data	No Data	0.178438	0.212156	0.311528	0.237837	0.138588	0.310258	0.463947	0.327753	0.374644	0.32033	0.168356	0.074895	0.147537	0.163236	0.106843	0.173424	0.202759	0.205911	No Data
2019	4	22	14	10	33	0.693111	0.804065	0.752255	0.718749	0.747574	0.777168	0.883776	1.01527	0.888055	0.886346	0.833631	0.772662	0.735987	0.694248	0.881628	0.955457	0.975214	0.682782	0.676968	0.758957	0.608983	0.695383	0.682782	0.668733	0.804544	0.897383	1.0057	0.89358	0.930388
2019	4	27	14	8	56	0.439308	0.498636	0.515962	0.580284	0.625477	0.620776	0.833603	0.56711	0.554379	0.541351	0.561903	0.570801	0.485054	0.465801	0.588187	0.91432	0.80355	0.652278	0.615357	0.554379	0.606442	0.655465	0.655465	0.704297	0.654192	0.607823	0.634766	0.810563	0.93101
2019	4	29	14	10	38	0.448991	0.414367	0.517595	0.566595	0.544856	0.612329	0.517595	0.577855	0.647346	0.677482	0.608379	0.645489	0.662	0.568724	0.645489	0.663205	0.663807	0.634221	0.749038	1.08642	1.07433	1.10886	1.07051	1.11323	1.06701	0.905846	0.990278	0.905006	0.959806
2019	5	15	13	47	51	0.603931	0.621694	0.71967	0.811161	0.623972	0.768211	0.683733	0.588831	0.641143	0.592043	0.621694	0.607839	0.600785	0.550517	0.620171	0.609395	0.676147	0.593642	0.600785	0.617878	0.528537	0.533003	0.588831	0.583166	0.666353	0.68987	0.736263	0.686468	0.76037
2019	5	21	13	44	48	0.798219	0.850651	0.718522	0.715091	0.634285	0.646736	0.642873	0.744662	0.819669	0.838764	0.712332	0.638985	0.638985	0.615097	0.678962	0.633498	0.666428	0.861239	0.824346	0.711641	0.766611	0.738724	0.705382	0.745318	0.707475	0.688375	0.660438	0.708867	0.707475
2019	5	23	13	45	12	No Data	No Data	No Data	No Data	No Data	No Data	No Data	No Data	No Data	No Data	No Data	No Data	No Data	0.212089	0.260847	0.302556	0.134008	0.256477	0.178936	0.210484	0.247617	0.326004	0.390458	0.311805	0.510257	0.481798	0.678349	0.538153	0.556546
2019	5	30	13	44	50	0.315669	0.498418	0.666137	0.804766	0.815636	0.794833	0.725131	0.640411	0.682916	0.744621	0.71829	0.643953	0.76412	0.718915	0.616483	0.702461	0.666817	0.74402	0.864084	0.867601	0.726366	0.830046	0.640411	0.676929	0.668853	0.634699	0.682254	0.540609	0.681591
2019	7	10	14	11	27	No Data	No Data	No Data	No Data	No Data	No Data	No Data	No Data	0.872682	0.835396	0.885345	0.910984	0.826549	0.942566	1.07482	0.98671	0.964271	0.865774	0.834361	0.914711	0.903948	No Data	No Data	No Data	No Data	No Data	No Data	No Data	No Data
2019	7	11	13	38	28	0.399248	0.311481	0.129783	0.072888	0.101134	0.299006	0.283323	0.220052	0.274556	0.354745	0.384047	0.548833	0.439161	0.615358	0.466212	0.425097	0.421797	0.458034	0.809646	0.703798	0.697747	0.602817	0.613027	0.440227	0.51653	0.335538	0.490989	0.408385	0.462139
2019	7	14	14	5	55	0.833116	0.790158	0.845964	0.925658	0.820572	0.94489	1.0834	1.02764	0.959123	1.03225	1.08142	1.11761	1.28119	1.30276	1.03225	0.961395	0.960033	1.02848	1.03391	1.03807	0.94257	0.981117	1.04879	0.96366	0.970419	0.922325	0.913206	0.882641	1.04509
2019	7	25	13	36	8	0.079012	0.091755	0.145212	No Data	0.100063	0.174283	0.154487	No Data	0.143335	0.205021	0.147082	0.287098	0.152646	0.268552	0.275767	0.259752	0.211595	0.319623	0.368372	0.314347	0.324845	0.364784	0.381319	0.370751	0.13956	0.249284	0.277198	0.2017	0.152646
2019	8	20	14	12	42	No Data	No Data	No Data	No Data	0.65452	0.699921	0.644885	0.667753	0.677644	0.620424	0.609521	0.532282	0.563713	0.536994	0.65452	0.690387	0.678257	0.63509	0.538556	0.583489	0.564458	0.547836	0.577701	0.582769	0.6298	0.557717	0.587077	0.579879	0.614316
2019	8	21	14	13	6	0.455721	0.507524	0.52112	0.525055	0.491082	0.543563	0.436657	0.450344	0.494411	0.458389	0.505089	0.506714	0.462807	0.508333	0.551844	0.453935	0.525839	0.49524	0.532068	0.505902	0.451244	0.530518	0.456612	0.475844	0.438503	0.428271	0.494411	0.468931	0.455721
2019	8	26	14	13	9	0.836265	0.803245	0.779092	0.786895	0.78586	0.79563	0.79665	0.768543	0.803245	0.887818	0.88737	0.850091	0.875151	0.8618	0.859473	0.801728	0.851035	0.804253	0.81773	0.803749	0.78066	0.812769	0.842019	0.849146	0.800209	0.706658	0.703133	0.644448	0.587946
2019	9	4	13	30	42	No Data	No Data	No Data	No Data	No Data	No Data	No Data	0.499816	0.444345	0.624855	0.515585	0.485511	0.463818	0.55185	0.464823	0.56119	0.401965	0.453658	0.500756	0.575326	0.544958	0.390519	0.438044	0.381176	0.396274	0.491279	0.419769	0.555265	0.463818
2019	9	7	13	27	58	0.394047	0.213492	0.368314	0.327109	0.308155	0.289999	0.198875	0.266331	0.316992	0.253229	0.39153	0.364341	0.335622	0.254886	0.382626	0.31845	0.420947	0.312593	0.366993	0.31553	0.412538	0.31553	0.249899	0.386461	0.296125	0.42451	0.377468	0.325676	0.322798
2019	9	12	14	13	51	0.676751	0.659321	0.695997	0.592912	0.758785	0.711868	0.731159	0.773189	0.815107	0.742459	0.786289	0.889962	0.850094	0.876909	0.872507	0.845528	0.864964	0.780778	0.798159	0.663574	0.669599	0.544456	0.78579	0.783289	0.821771	0.755134	0.790269	0.803531	0.855085
2019	9	20	14	15	37	1.06821	1.17309	1.136	1.22271	1.38445	1.37412	1.28248	1.36205	1.51627	1.2712	1.15915	1.10777	1.11109	1.15244	1.23215	1.1978	1.12131	1.11539	1.15755	1.1415	1.12164	1.08224	1.12033	1.10644	1.13015	1.09272	1.20646	1.13892	1.11868
2019	9	24	13	26	16	No Data	No Data	No Data	0.386271	0.388794	0.331592	0.565782	0.494423	0.426411	0.39505	0.460408	0.471271	0.444815	0.431073	0.402457	0.611818	0.302611	0.366939	0.370865	0.41934	0.478747	0.416961	0.444815	0.498527	0.502601	0.511656	0.358998	0.528361	0.378626
2019	9	26	13	25	44	0.265226	0.258829	0.334812	0.117958	0.338943	0.213323	0.266812	0.325041	0.170897	0.239123	0.286987	0.307836	0.155222	0.268394	0.184207	0.38606	0.333428	0.279324	0.232375	0.288505	0.155222	0.159189	0.276226	0.235761	0.239123	0.220337	0.122244	0.283936	0.33204
2019	10	9	14	6	0	0.360751	0.558825	0.55162	0.539395	0.548386	0.516673	0.512359	0.483889	0.558825	0.527733	0.523506	0.48114	0.529414	0.558029	0.584471	0.597236	0.482058	0.600936	0.615497	0.67031	0.574509	0.565153	0.65842	0.560414	0.574509	0.600198	0.581425	0.631795	0.555635
2019	10	12	13	23	13	0.446803	0.436634	0.334861	0.49798	0.481459	0.46765	0.534366	0.531505	0.428586	0.490814	0.478303	0.501023	0.523799	0.534366	0.560389	0.429744	0.513025	0.49798	0.47619	0.420413	0.410914	0.490814	0.438911	0.495943	0.45015	0.527665	0.432051	0.519906	0.44456
2019	10	14	14	15	40	0.629685	0.657354	0.627044	0.599954	0.548468	0.620389	0.549985	0.497599	0.546186	0.518034	0.454253	0.590164	0.565666	0.607531	0.610261	0.568604	0.623726	0.706258	0.686204	0.748893	0.662363	0.577326	0.645928	0.547709	0.585206	0.650397	0.66733	0.667948	0.704514
2019	10	15	14	15	35	0.577286	0.572984	0.643991	0.55618	0.609237	0.667711	0.690535	0.638875	0.591397	0.515415	0.574421	0.710262	0.776389	0.700477	0.654719	0.636945	0.591397	0.568648	0.55246	0.672588	0.790163	0.778448	0.750101	0.788647	0.652212	0.651584	0.668934	0.729386	0.621935
2019	10	19	14	12	55	0.43566	0.414333	0.457069	0.436609	0.441329	0.475009	0.428967	0.446007	0.354616	0.45798	0.40736	0.374233	0.472356	0.457069	0.428967	0.441329	0.434709	0.438502	0.397234	0.362335	0.432802	0.396211	0.390026	0.388989	0.336521	0.50503	0.383767	0.43566	0.438502
2019	10	20	14	14	34	0.379032	0.388474	0.38009	0.347369	0.354083	0.424607	0.393645	0.278688	0.399784	0.330185	0.346242	0.389512	0.460223	0.461129	0.387433	0.487609	0.528252	0.50373	0.472764	0.483285	0.312395	0.43801	0.394673	0.342843	0.43801	0.423636	0.45384	0.478927	0.432308
2019	10	26	14	15	51	0.564021	0.623798	0.540265	0.546493	0.511336	0.503859	0.508025	0.467531	0.554181	0.552652	0.517897	0.523575	0.556467	0.537911	0.507194	0.481661	0.516264	0.549581	0.528395	0.564021	0.546493	0.508855	0.508025	0.511336	0.564021	0.55035	0.52599	0.592551	0.65346
2019	10	28	14	12	46	0.751478	0.839273	0.71139	0.732883	0.787839	0.764542	0.766694	0.730614	0.7724	0.777351	0.789226	0.755133	0.757317	0.755133	0.82233	0.800894	0.7724	0.762383	0.769553	0.795428	0.747064	0.757317	0.836046	0.798849	0.737395	0.673551	0.738144	0.765978	0.764542
2019	11	8	13	19	27	0.47437	0.502077	0.37849	0.407534	0.438853	0.446399	0.541158	0.470804	0.404837	0.458741	0.514317	0.546373	0.601696	0.549479	0.575697	0.495283	0.507675	0.502077	0.635519	0.499822	0.577664	0.511006	0.403483	0.54011	0.495283	0.445149	0.458741	0.437585	0.420812
2019	11	11	15	4	18	0.385551	0.290637	0.289142	0.352335	0.420237	0.325224	0.281603	0.486481	0.647575	0.738657	0.753061	0.698336	0.687655	0.688373	0.690522	0.680431	0.696923	0.629653	0.665718	0.602113	0.614424	0.652163	0.699041	0.774087	0.723922	0.480318	0.452763	0.360194	0.362787
2019	11	17	14	14	47	0.547441	0.403042	0.382451	0.359784	0.381283	0.447108	0.456306	0.500992	0.490639	0.500992	0.524707	0.543141	0.521125	0.486825	0.481052	0.517519	0.488735	0.53092	0.506557	0.49725	0.566805	0.578273	0.548297	0.514799	0.565147	0.559307	0.540545	0.481052	0.529152
2019	11	29	14	16	57	0.595955	0.631873	0.626347	0.623564	0.729792	0.636439	0.633703	0.629117	0.689493	0.742926	0.613246	0.631873	0.705115	0.679418	0.725876	0.693643	0.673463	0.766947	0.565921	0.719561	0.734458	0.686153	0.68866	0.734458	0.692815	0.732129	0.701859	0.706737	0.709967
2019	12	16	14	15	9	0.818632	0.719105	0.703751	0.710078	0.61159	0.720483	0.667365	0.734095	0.721857	0.677036	0.749398	0.709378	0.734095	0.703044	0.770106	0.701627	0.690899	0.680715	0.695929	0.665864	0.651408	0.645992	0.736783	0.587182	0.575893	0.567944	0.635011	0.69162	0.640527
2019	12	25	13	11	55	0.499744	0.415429	0.478816	0.445049	0.50924	0.503834	0.538055	0.625358	0.627543	0.637274	0.596183	0.50924	0.586901	0.567868	0.591561	0.572687	0.647902	0.560563	0.668606	0.564228	0.554401	0.604184	0.51725	0.549422	0.487285	0.522525	0.638346	0.536777	0.597333
2020	1	4	14	16	4	0.498111	0.507434	0.472434	0.541288	0.50846	0.55559	0.505376	0.523625	0.492861	0.493915	0.506406	0.522627	0.544178	0.569535	0.536438	0.594683	0.584041	0.597313	0.554648	0.535463	0.615393	0.553704	0.523625	0.591157	0.6008	0.520626	0.558407	0.515589	0.50331
2020	1	7	14	15	34	0.457347	0.422652	0.426003	0.443526	0.509317	0.50645	0.528051	0.451012	0.419278	0.491888	0.453132	0.567163	0.467739	0.554135	0.570587	0.54617	0.524355	0.52989	0.544385	0.512168	0.537185	0.552375	0.52989	0.61884	0.643424	0.645678	0.660485	0.57399	0.523427
2020	1	19	14	14	9	0.329796	0.380134	0.356231	0.383808	0.36008	0.472276	0.561469	0.565833	0.618927	0.588835	0.623663	0.633794	0.649802	0.691213	0.639943	0.599588	0.689103	0.685569	0.774027	0.689807	0.755256	0.649049	0.663188	0.644514	0.593823	0.601224	0.534543	0.498438	0.50624
2020	1	20	13	7	15	0.880261	0.861055	0.680613	0.796075	0.771848	0.828922	0.792785	0.832824	0.845932	0.841333	0.834379	0.868501	0.877338	0.900409	0.971058	1.00428	1.02537	1.00991	1.0478	1.06856	0.88824	0.925568	0.904659	0.898276	0.965832	0.965832	No Data	No Data	No Data
2020	1	25	14	14	56	0.556469	0.663705	0.739071	0.688437	0.547463	0.563572	0.546555	0.60029	0.574925	0.513772	0.571456	0.583506	0.595306	0.545644	0.60605	0.656234	0.63246	0.585206	0.592798	0.578373	0.574925	0.60029	0.552884	0.549276	0.541071	0.55018	0.60441	0.587748	0.560032
2020	1	29	14	14	36	0.148909	0.28632	0.337461	0.323142	0.281081	0.282833	0.201215	0.334314	0.16476	0.323142	0.190776	0.324753	0.313365	0.396633	0.291503	0.402192	0.385332	0.337461	0.493336	0.303394	0.308404	0.415834	0.366422	0.378142	0.272225	0.282833	0.337461	0.361957	0.339027
2020	1	30	14	38	21	0.224442	0.127334	0.156859	0.131378	0.188264	0.139363	0.177412	0.265817	0.1253	0.106586	0.145266	0.040704	0.186472	0.191828	0.204099	0.173739	0.186472	0.156859	0.255016	0.170039	0.261217	0.16631	0.12936	0.212679	0.098027	0.055111	0.197125	0.175579	0.234304
2020	2	3	14	33	11	0.307171	0.334326	0.302745	0.405627	0.458545	0.461819	0.455251	0.526327	0.593556	0.587528	0.57173	0.551801	0.605424	0.483144	0.526327	0.612926	0.568159	0.583184	0.628453	0.597822	0.59184	0.666705	0.658329	0.595266	0.581437	0.549027	0.515602	0.590119	0.484188
2020	2	4	14	14	27	0.573911	0.645704	0.57824	0.608471	0.663103	0.606012	0.526794	0.623809	0.583391	0.581679	0.522999	0.6254	0.557153	0.651813	0.620613	0.6254	0.591874	0.642625	0.708349	0.662357	0.642625	0.648002	0.70418	No Data	No Data	No Data	No Data	No Data	No Data
2020	2	20	13	0	59	0.432525	0.457879	0.480499	0.488351	0.435977	0.294352	0.356189	0.400389	0.405885	0.385443	0.377804	0.446199	0.331514	0.377804	0.454568	0.377804	0.477326	0.331514	0.413123	0.368092	0.430791	0.494552	0.511247	0.478914	0.470922	0.444509	0.40406	0.446199	0.512739
2020	2	22	13	2	8	0.5077	0.369058	0.450518	0.394101	0.422347	0.518687	0.440829	0.400177	0.497745	0.469382	0.545805	0.527082	0.561687	0.541184	0.537692	0.552667	0.548102	0.425233	0.537692	0.529458	0.559445	0.529458	0.524697	0.515049	0.430958	0.595337	0.450518	0.558321	0.395627
2020	2	25	13	2	57	0.157368	0.178896	0.121836	0.113865	0.019268	0.142462	0.212772	0.077691	0.149973	0.083439	0.129675	0.285617	0.113865	0.149973	0.063006	0.157368	No Data	0.091933	0.194999	0.264479	0.256562	0.185863	0.137388	0.188163	0.167055	0.32014	0.264479	0.188163	0.174194
2020	2	27	14	56	14	0.427657	0.572252	0.551724	0.350323	0.353837	0.472265	0.458127	0.346784	0.321294	0.294443	0.385522	0.387713	0.494137	0.49681	0.500353	0.417439	0.558121	0.405963	0.399595	0.408068	0.381114	0.287832	0.433694	0.410165	0.321294	0.438672	0.499469	0.409118	0.423594
2020	3	10	14	15	20	0.64998	0.643846	0.681033	0.714252	0.735258	0.93456	0.869544	0.860764	0.8849	0.85138	0.899483	0.842376	0.882522	0.883474	0.923342	0.874859	0.828139	0.782489	0.760154	0.770298	0.822467	0.874859	0.820392	0.955674	0.942983	0.900415	0.885375	0.89105	0.79769
2020	3	11	14	16	57	0.860218	0.974473	0.995069	0.92026	1.01367	0.974072	0.909923	0.930886	0.922397	0.951318	0.976075	1.00014	0.895483	0.982849	0.938033	0.97327	0.853239	0.884359	0.936777	0.950907	0.972065	0.990358	1.00248	0.971261	0.961145	0.933416	0.945947	0.895041	0.860218
2020	3	15	14	39	31	0.552045	0.626486	0.703589	0.671064	0.662826	0.470975	0.642436	0.687874	0.532442	0.750297	0.644578	0.627954	0.536763	0.650253	0.686546	0.749696	0.760425	0.662134	0.749095	0.80666	0.851518	0.622799	0.578223	0.503037	No Data	No Data	No Data	No Data	No Data
2020	3	30	12	57	39	0.313756	0.32496	0.380388	0.422622	0.395771	0.393008	0.406678	0.357156	0.416038	0.381805	0.408026	0.445662	0.349673	0.316982	0.409369	0.387437	0.402615	0.508225	0.440628	0.430415	0.342079	0.495825	0.37324	0.378966	0.405327	0.441891	0.435546	0.335921	0.282015
2020	4	1	12	54	24	0.398012	0.176108	0.286626	0.286626	0.275503	0.402408	0.207246	0.316856	0.325411	0.304629	0.398012	0.299296	0.277374	0.343736	0.348621	0.373911	0.238535	0.269847	0.232435	0.311652	0.3906	0.295708	0.342097	0.275503	0.25444	0.293905	0.222098	0.228327	0.290279
2020	4	20	12	52	46	0.220197	0.142411	0.046764	0.174628	0.030164	0.319232	0.090847	0.176701	0.090847	0.095773	0.188956	0.297073	0.251336	0.046764	0.159862	0.117327	0.320777	0.128892	0.231415	0.383149	0.080839	0.309854	0.223965	0.287267	0.334481	No Data	0.174628	0.176701	0.220197
2020	5	10	13	49	28	1.13089	1.10337	1.09953	1.17234	1.19494	1.18697	1.18276	1.17467	1.23083	1.12678	1.12843	1.14709	1.29117	1.11055	1.06901	1.0805	1.06319	1.14629	1.17118	1.1239	1.06454	1.10422	1.24272	1.46926	1.44906	1.41704	1.43525	1.38272	1.31868
2020	5	14	12	48	32	0.070955	0.17493	0.172894	0.313718	0.213949	0.352056	0.283728	0.221391	0.083422	0.208292	0.253544	0.14991	0.13025	0.285352	0.206392	0.302877	0.286971	0.17493	0.213949	0.273869	0.363292	0.083422	0.083422	0.250074	0.028684	0.176957	0.039614	0.180987	0.164662
2020	5	18	12	47	10	0.981923	1.03788	1.04438	0.98019	1.03896	1.01757	1.03079	1.01033	1.02531	1.02255	1.02365	1.05297	1.04276	1.03842	1.03788	1.02034	1.08248	0.988251	1.02476	1.03134	1.06466	1.05083	1.06308	1.04653	1.05724	1.04599	1.01089	1.07099	1.04707
2020	5	21	13	47	8	0.657175	0.713655	0.682394	0.842022	0.879061	0.828404	0.875059	0.843436	0.797859	0.762295	0.749911	0.633802	0.829853	0.835612	0.864935	0.819634	0.710071	0.686169	0.633802	0.63484	0.706463	0.450369	0.590443	0.767171	0.792474	0.819634	0.807724	0.797093	0.846256
2020	6	19	14	44	4	1.20626	1.11305	1.04108	1.06645	1.0996	1.02622	1.08799	1.10714	1.12246	1.07014	1.0582	1.04192	1.03432	0.99886	1.08154	0.995768	1.05944	1.08477	1.04066	1.16615	1.16389	1.14373	0.981046	1.06151	1.00981	1.06234	0.90969	0.918477	0.991333
2020	7	19	14	14	58	0.87308	0.889528	0.817523	0.806757	0.795819	0.818979	0.721085	0.936864	1.03791	0.686428	0.839512	1.0014	1.20236	1.07418	0.982381	0.915468	0.859929	0.783171	0.873529	0.941406	0.883789	0.900008	0.888648	0.874875	0.80725	0.814603	0.859014	0.887767	0.792805
2020	7	23	14	43	25	0.928621	0.89539	0.834408	0.885372	0.916182	0.955654	0.912182	0.760588	0.615054	0.651674	0.78633	0.805172	0.930862	0.910462	0.867359	1.11652	1.14332	1.10868	1.10822	1.04632	0.980784	1.02899	1.14826	1.21635	0.662563	0.793795	0.885372	0.916752	0.900641
2020	7	26	13	51	14	0.601865	0.691499	0.734233	0.874749	0.842573	0.843292	0.933667	0.960824	0.84401	0.746332	0.752282	0.810014	0.849011	0.767291	0.739452	0.789852	0.701812	0.793786	0.739452	0.709188	0.903312	0.67613	0.583535	0.699952	0.686744	0.773832	0.789062	0.806959	0.848299
2020	8	3	14	44	53	0.960903	1.02573	0.899289	0.977459	0.949118	1.01439	1.04306	1.18637	1.12667	1.14942	1.00847	0.967979	1.03425	1.14491	1.16288	1.30245	1.22898	1.21744	1.16185	1.24858	1.30657	1.32391	1.14769	1.09661	1.09407	1.14769	1.15012	1.30182	1.17587
2020	8	6	14	16	2	0.858157	0.783122	0.806047	0.731393	0.75182	0.805546	0.722921	0.750188	0.748551	0.788798	0.749642	0.740306	0.690245	0.714911	0.756692	0.758309	0.72349	0.792386	0.769511	0.839301	0.785708	0.805546	0.773203	0.78674	0.827744	0.832583	0.800009	0.743617	0.770568
2020	8	21	14	15	41	0.947031	0.842467	0.982399	0.990819	0.882302	0.880018	0.896762	0.957881	0.890921	0.947451	0.909633	0.980382	0.925752	0.918387	0.842467	0.832765	0.88821	0.896314	0.869882	0.92489	0.959538	1.00546	0.940706	0.944085	0.904776	0.988821	0.940283	0.899443	0.856776
2020	8	26	12	29	47	0.699132	0.79003	0.740888	0.641988	0.681846	0.655571	0.704787	0.695713	0.7334	0.796902	0.719256	0.904499	0.904499	0.908695	0.81044	0.897739	0.878833	0.873594	0.850446	0.692276	0.824656	0.672423	0.748289	0.724734	0.748289	0.795924	0.713731	0.927708	0.792983
2020	8	28	14	3	2	0.954223	1.06225	1.04797	1.09019	1.12954	1.04627	1.07385	1.09221	1.14234	1.24204	1.40896	1.46161	1.45666	1.49558	1.47876	1.47777	1.58394	1.56863	1.44939	1.21752	1.14811	1.13227	1.10467	1.16375	1.1377	0.967812	1.03604	0.931201	0.910473
2020	9	1	14	1	0	0.266269	0.293782	0.267756	0.396527	0.35468	0.339495	0.295189	0.374239	0.303544	0.264777	0.270717	0.194161	0.401097	0.391915	0.421176	0.481048	0.466208	0.515059	0.428778	0.475162	0.423359	0.405628	0.464197	0.366993	0.397674	0.365775	0.371835	0.370629	0.381384
2020	9	5	13	50	4	0.285901	0.346575	0.375905	0.395575	0.357134	0.401956	0.619771	0.719832	0.913899	1.25174	1.29	1.26627	1.38986	1.38258	1.50931	1.77296	1.95654	1.93053	1.53124	1.14095	1.02163	0.973324	0.89563	0.918083	0.884396	0.791689	0.780472	0.763599	0.766705
2020	9	6	12	30	8	0.393947	0.534818	0.573588	0.67537	0.702536	0.737844	0.661319	0.651766	0.67537	0.704305	0.785477	0.701649	0.699872	0.564704	0.486713	0.513141	0.461632	0.317827	0.392407	0.406104	0.420912	0.244901	0.246965	0.22593	0.350658	0.36712	0.18795	0.123389	0.36712
2020	9	10	12	27	55	0.507633	0.503976	0.56746	0.654376	0.529082	0.557555	0.551975	0.456701	0.558664	0.558664	0.575046	0.52084	0.436276	0.581468	0.440425	0.508847	0.544069	0.468589	0.54179	0.455363	0.397385	0.445906	0.376012	0.364983	0.302345	0.232807	0.348803	0.448625	0.356957
2020	9	11	14	14	8	0.29399	0.399602	0.266606	0.269159	0.284206	0.406442	0.325664	0.280487	0.287897	0.451081	0.385644	0.310663	0.485603	0.53357	0.456404	0.393666	0.383619	0.395652	0.42363	0.395652	0.428306	0.415107	0.355465	0.300009	0.267884	0.318796	0.395652	0.365023	0.26146
2020	9	16	12	26	47	0.73042	0.710693	0.668176	0.779033	0.73236	0.792411	0.70768	0.699572	0.669249	0.722604	0.758908	0.73236	0.75331	0.779933	0.668176	0.750494	0.869229	0.854032	0.755182	0.708686	0.766298	0.692389	0.75331	0.836026	0.534815	0.794175	0.699572	0.66061	0.744822
2020	9	17	12	27	35	0.475812	0.567808	0.418132	0.412294	0.467946	0.435264	0.513509	0.513509	0.563387	0.563387	0.613282	0.674092	0.664844	0.721759	0.72768	0.655452	0.630316	0.641081	0.555566	0.527887	0.479703	0.583014	0.617335	0.50371	0.597825	0.571101	0.506177	0.451857	0.519546
2020	9	22	14	30	17	0.144526	0.020195	0.07429	No Data	0.011622	0.144526	No Data	0.07806	0.092847	0.207199	0.134629	0.202879	0.215727	0.208631	0.277835	0.185202	0.105417	0.124522	0.210058	0.228244	0.233706	0.247101	0.158999	0.20143	0.217133	0.103641	0.261425	0.177642	0.042991
2020	9	23	14	16	30	No Data	No Data	No Data	No Data	No Data	No Data	No Data	No Data	No Data	No Data	No Data	No Data	1.07338	1.09319	1.00614	1.01192	1.09186	1.29081	1.32987	1.3659	1.33188	1.17015	1.198	1.09019	1.04835	1.01588	0.881787	0.912778	1.02125
2020	10	10	12	23	27	0.92409	0.902258	0.93942	0.928786	0.965417	0.936112	0.886883	0.888998	0.900179	0.976228	1.00605	1.02001	0.999306	1.01215	1.11912	1.14834	1.17376	1.11088	1.00238	0.98378	0.887589	0.901565	0.940739	0.912567	0.909146	0.944028	0.926777	0.89251	0.827367
2020	10	12	14	15	43	0.543059	0.558692	0.524389	0.52266	0.441528	0.532103	0.656848	0.528688	0.513931	0.496951	0.51481	0.597109	0.635242	0.520056	0.716754	0.727825	0.796034	0.797131	0.783842	0.787189	0.787189	0.825064	0.7657	0.802048	0.745264	0.774266	0.775966	0.797131	0.817654
2020	10	14	13	51	4	0.432469	0.411256	0.369194	0.230714	0.365801	0.343131	0.228439	0.304055	0.286264	0.452792	0.429495	0.380887	0.516684	0.604624	0.55742	0.55742	0.516684	0.697466	0.742857	0.679625	No Data	No Data	No Data	No Data	No Data	No Data	No Data	No Data	No Data
2020	10	15	14	45	32	0.238336	0.250673	0.316197	0.283089	0.284513	0.540207	0.652158	0.425135	0.482358	0.326764	0.299917	0.398568	0.419711	0.490054	0.403091	0.476513	0.450419	0.553129	0.518885	0.546275	0.432636	0.505125	0.496699	0.696394	0.659995	0.581359	0.488141	0.491961	0.485257
2020	10	19	12	20	51	0.229639	0.321056	0.348158	0.280478	0.253592	0.294374	0.304067	0.390351	0.216062	0.420257	0.351665	0.302143	0.298273	0.333885	0.315457	0.49169	0.74799	0.634743	0.42785	0.526651	0.385467	0.348158	0.342853	0.390351	0.360327	0.355147	0.346396	0.286481	0.375558
2020	10	21	14	45	56	0.518755	0.651196	0.619757	0.724205	0.730816	0.77919	0.651876	0.78911	0.713849	0.702069	0.688144	0.585768	0.703944	0.796725	0.858787	0.820123	0.850318	0.83819	0.904416	0.83717	0.899271	0.869116	0.700816	0.708916	0.826888	0.802114	0.761182	0.716301	0.731414
2020	10	27	14	25	58	0.231699	0.101595	No Data	0.084924	0.26053	0.196044	0.209314	0.215815	0.286373	0.47284	0.549865	0.589842	0.509535	0.583505	0.577097	0.610726	0.686875	0.545621	0.522125	0.640347	0.520344	0.441767	0.486302	0.475753	0.43658	0.327961	0.451991	0.528313	0.504049
2020	11	22	12	18	24	0.834428	0.811598	0.815622	0.755882	0.856546	0.78694	0.868755	0.766758	0.864083	0.857493	0.88351	0.880765	0.905115	0.868755	0.913942	0.885334	1.01386	0.956669	0.968246	1.00916	0.947459	0.912184	0.816625	0.821616	0.889875	0.812606	0.810588	0.837352	0.789029
2020	11	23	14	15	9	0.495111	0.490276	0.463386	0.461339	0.524167	0.468469	0.416421	0.452031	0.445732	0.44784	0.438289	0.442555	0.469479	0.468469	0.596005	0.492215	0.545651	0.464406	0.519584	0.583831	0.514033	0.514033	0.521422	0.518663	0.606352	0.583009	0.603188	0.53322	0.526899
2020	11	27	13	52	27	0.453948	0.569385	0.43261	0.403208	0.604998	0.643821	0.690109	0.597832	0.667476	0.689101	0.545948	0.539239	0.453948	0.544614	0.589342	0.602621	0.681991	0.664312	0.565554	0.62134	0.797505	0.795849	0.795849	0.802444	0.765169	0.67062	0.64492	0.745543	0.675819
2020	12	1	14	52	0	0.397641	0.309184	0.342271	0.470991	0.312149	0.413639	0.403852	0.339478	0.418465	0.424434	0.449924	0.517822	0.504703	0.545056	0.422055	0.464428	0.436174	0.443094	0.361401	0.433847	0.526723	0.550722	0.605307	0.554468	0.557261	0.3032	0.447657	0.400134	0.423246
2020	12	11	14	42	16	0.306635	0.355067	0.388914	0.345174	0.349437	0.273188	0.284588	0.303544	0.437656	0.305092	0.301992	0.349437	0.398006	0.429235	0.498481	0.494205	0.345174	0.408204	0.507982	0.526503	0.458711	0.628042	0.509028	0.542458	0.489894	0.549297	0.531538	0.481168	0.588667
2020	12	12	14	13	10	0.345496	0.373152	0.362793	0.399393	0.602725	0.595127	0.438124	0.501009	0.565478	0.544501	0.493922	0.556454	0.575241	0.581367	0.569937	0.667745	0.595127	0.632953	0.624129	0.504018	0.67298	0.504018	0.576998	0.511963	0.550969	0.510976	0.531335	0.529428	0.48983
2020	12	23	14	13	55	0.579789	0.595088	0.621319	0.600098	0.729559	0.677843	0.62928	0.614872	0.68868	0.728216	0.711183	0.674187	0.628489	0.687964	0.769861	0.73822	0.749373	0.735568	0.785436	0.810818	0.728216	0.728887	0.716683	0.826654	0.81966	0.757774	0.824912	0.824912	0.77925
2020	12	30	14	52	6	0.125704	0.255383	0.146214	0.245666	0.277341	0.22903	0.342008	0.23072	0.277341	0.271166	0.287965	0.09765	0.248926	0.134014	0.136069	0.210053	0.237419	0.2804	0.367007	0.204747	0.206522	0.33522	0.210053	0.127795	0.26961	0.227335	0.22903	0.240734	0.09765
2021	1	15	14	15	27	0.73306	0.801783	0.853013	1.06288	1.26128	1.47885	1.71022	1.8521	1.83	1.88869	1.93149	1.91319	1.90803	1.64448	1.69173	1.87866	1.92622	1.88216	1.85745	1.71022	1.72456	1.73639	1.68108	1.69601	1.71108	1.71455	1.74789	1.58404	1.35411
2021	1	19	13	54	58	0.839335	0.855098	0.852761	0.818174	0.839335	0.8039	0.842522	0.894926	0.909289	0.945788	1.00022	1.01659	0.969411	0.943108	0.946456	0.926086	0.926086	0.894926	0.971982	0.932268	0.945788	0.859745	0.903585	0.862822	0.843316	0.821481	0.805598	0.833714	0.824769
2021	1	22	14	13	13	0.421451	0.466155	0.435141	0.643028	0.588148	0.557628	0.577842	0.545743	0.586288	0.599184	0.514863	0.598272	0.624141	0.597359	0.632801	0.652251	0.567344	0.539703	0.60191	0.533597	0.498746	0.493265	0.54474	0.4615	0.549733	0.573094	0.527423	0.53462	0.613576
2021	2	5	14	13	36	0.457654	0.511112	0.470322	0.490174	0.454687	0.437555	0.570337	0.651794	0.542357	0.492952	0.4477	0.461584	0.458639	0.507528	0.558164	0.548233	0.571139	0.743627	0.594693	0.575928	0.53982	0.597762	0.580678	0.511112	0.583038	0.493874	0.47892	0.445686	0.428255
2021	2	6	14	16	58	0.72009	0.744378	0.824355	0.92107	0.878807	0.836256	0.8385	0.791582	0.868668	0.892982	0.982414	0.963098	1.04714	1.03709	0.899714	0.929552	0.954959	0.950134	0.976805	0.934007	0.963098	1.05751	1.0265	0.985204	0.963098	0.93203	0.876152	0.851269	0.811666
2021	2	23	14	12	42	0.769474	0.718425	0.796081	0.861706	0.924251	0.955767	0.975695	0.896762	0.766	0.884604	0.83859	0.864733	0.918173	0.921452	0.920984	0.904443	0.917704	0.927041	0.870751	0.860694	0.845861	0.824352	0.771205	0.743555	0.641971	0.641971	0.685695	0.563151	0.569615
2021	3	6	14	35	44	0.163827	No Data	0.202667	0.370721	0.411439	0.519366	0.270659	0.190643	0.289496	0.478572	0.520279	0.475608	0.451282	0.302131	0.327803	0.395535	0.327803	0.406944	0.67501	0.605576	0.613365	0.419213	0.37193	0.330431	0.467622	0.418109	0.411439	0.44607	0.564121
2021	3	16	14	37	50	0.489179	0.541112	0.613604	0.604584	0.546812	0.500509	0.438219	0.495506	0.344899	0.533019	0.489179	0.541112	0.58395	0.678842	0.759937	0.768158	0.80821	0.8089	0.698614	0.703653	0.736867	0.664636	0.747756	0.721731	0.683204	0.663735	0.61261	0.61953	0.61261
2021	4	13	14	15	57	1.70905	1.60194	1.56784	1.50852	1.65037	1.62819	1.62504	1.58949	1.55399	1.67321	1.62426	1.73104	1.73146	1.65836	1.58794	1.46446	1.54172	1.57092	1.53904	1.56938	1.56668	1.46598	1.51956	1.51766	1.56321	1.50129	1.45725	1.48153	1.42309
2021	4	22	13	58	11	1.28026	1.24846	1.3076	1.20206	1.13208	1.18641	1.18602	1.28663	1.32712	1.67603	1.75091	1.93368	1.87856	1.86318	1.80717	1.84877	1.83386	1.81469	1.86819	1.98564	2.03638	1.97743	1.87945	1.86052	1.83882	1.87352	1.76635	1.78527	1.70277
2021	4	23	14	34	35	1.36872	1.39013	1.39208	1.41663	1.42014	1.41021	1.41918	1.45422	1.45796	1.48727	1.52395	1.51522	1.55201	1.54845	1.55172	1.58213	1.6146	1.52995	1.46851	1.34218	1.1748	1.0676	1.01087	1.01189	1.06194	1.02049	1.02351	1.02949	0.971968
2021	4	25	13	48	28	1.04971	1.02418	0.996103	0.974224	1.13429	1.28136	1.21916	1.3989	1.40621	1.4119	1.62351	1.76021	1.77222	1.7926	1.86007	1.87336	1.87099	1.75907	1.75364	1.67369	1.73568	1.60746	1.51955	1.46978	1.58615	1.3294	1.26924	1.24049	1.3445
2021	4	26	13	47	55	No Data	No Data	No Data	No Data	No Data	No Data	No Data	1.66553	1.72193	1.69937	1.71955	1.72133	1.71094	1.76181	1.79685	1.78454	1.86744	1.89915	1.74303	1.53559	1.5585	1.4812	1.48183	1.46569	1.47931	1.51338	1.5362	1.45389	1.43812
2021	5	2	14	15	11	1.35441	1.33977	1.29884	1.29294	1.30905	1.27796	1.18815	1.2156	1.2976	1.37292	1.56062	1.74217	2.0349	2.01565	2.01168	2.07163	2.01432	1.98658	1.87949	1.73319	1.93779	1.54725	1.29915	1.23493	1.24195	1.2314	1.2314	1.21139	1.22368
2021	5	4	13	47	41	1.32846	1.30334	1.25995	1.21885	1.34949	1.39292	1.37045	1.33497	1.47235	1.57451	1.60799	1.63598	1.69744	1.79285	1.83721	1.87916	1.88609	1.87571	1.91905	1.99166	2.03155	1.89449	1.85624	1.43647	1.35874	1.36856	1.43887	1.43136	1.35652
2021	5	7	13	46	57	0.937544	0.951063	0.978998	0.989379	1.03201	0.995642	0.960114	0.878194	0.97433	1.00353	1.05051	0.992803	1.1474	1.25696	1.35917	1.40363	1.37822	1.36855	1.3298	1.33166	1.33722	1.23055	1.27401	1.25214	1.24405	1.19348	1.19133	1.14053	1.14053
2021	5	13	14	36	17	1.44249	1.39982	1.40636	1.38	1.40749	1.42412	1.38607	1.39497	1.45626	1.44663	1.47344	1.52061	1.78969	2.00135	2.07757	2.10054	2.11222	2.13733	2.0269	1.94866	1.98934	1.95866	1.98281	1.76812	1.55506	1.48427	1.48103	1.47317	1.51929
2021	5	19	11	46	22	1.02993	1.03328	1.03328	1.0198	1.07503	1.02065	0.979917	1.05233	1.07102	1.11364	1.11132	1.19458	1.21911	1.29551	1.2831	1.30718	1.25874	1.29276	1.36949	1.33781	1.35335	1.38691	1.30786	1.27894	1.11132	1.05478	1.07343	1.09962	1.06374
2021	5	27	14	13	36	0.949567	0.964576	0.986199	0.974026	1.04283	0.977696	1.01397	0.964576	0.930415	0.987407	1.02523	1.02677	1.02136	1.02985	1.07454	1.10174	1.26392	1.28618	1.28111	1.32229	1.3226	1.24238	1.19182	1.18647	1.22874	1.17672	1.10424	0.964162	0.969519
2021	5	28	11	44	36	0.860623	0.860623	0.807324	0.874499	0.928448	0.913786	0.845525	0.83399	0.822264	0.797181	0.810338	0.9512	0.9512	0.878155	0.849329	0.974964	1.16059	1.1887	1.20321	1.21628	1.08386	1.13601	1.17605	1.12005	0.813339	0.758262	0.80833	0.809335	0.891712
2021	6	3	13	47	14	1.07847	1.1202	1.08729	1.1551	1.19013	1.22413	1.23108	1.31171	1.37691	1.37423	1.56859	1.82873	1.97332	1.89701	1.87097	1.94008	1.95597	1.89547	1.74236	1.82185	1.80726	1.71893	1.62372	1.49121	1.27792	1.20254	1.14748	1.11266	1.08959
2021	6	13	13	46	50	0.853333	0.858414	0.786638	0.79894	0.810978	0.881557	0.871751	0.824555	0.907718	0.890406	0.865121	0.826341	0.888807	0.936498	1.07142	1.11519	1.19781	1.21796	1.02922	0.796125	0.837815	0.705284	0.730256	0.774057	0.714103	1.2993	1.11519	0.892001	0.789501
2021	6	24	13	47	42	1.19437	1.17455	1.13465	1.13163	1.14365	1.14194	1.1398	1.15043	1.14535	1.15674	1.19037	1.17985	1.19916	1.35235	1.75333	1.76038	1.85443	1.88243	1.84719	1.86808	1.84086	1.91363	1.86656	1.84267	1.75509	1.73075	1.62183	1.49927	1.38817
2021	6	27	13	46	34	0.773137	0.75992	0.80595	0.80595	0.788292	0.800126	0.918156	0.954707	1.04695	1.32172	1.55015	1.64032	1.63738	1.65328	1.76203	1.78393	1.82479	1.82149	1.58493	1.1326	1.07524	1.03809	0.947909	0.843096	0.789039	0.753589	0.713968	0.696557	0.770827
2021	6	28	13	46	26	1.2291	1.24022	1.26326	1.27161	1.26963	1.28419	1.32024	1.33781	1.32888	1.32925	1.37143	1.3573	1.52813	1.67382	1.79454	1.89452	1.87028	1.93246	1.94564	1.99496	1.98726	1.93617	1.92709	1.95721	1.58448	1.30849	1.18617	1.14226	1.09075
2021	6	29	11	39	13	No Data	No Data	No Data	1.29761	1.32214	1.31764	1.31377	1.282	1.35983	1.38202	1.28265	1.34008	1.31313	1.2807	1.3324	1.35092	1.31184	1.32278	1.34774	1.32214	1.31377	1.36681	1.33048	1.34837	1.31699	1.37316	1.35665	1.31377	1.30603
2021	7	4	14	36	41	1.38373	1.37119	1.35089	1.36093	1.22439	1.27564	1.28576	1.30218	1.40321	1.56023	1.72491	1.85869	1.98334	2.12371	2.14077	2.07489	2.12769	2.14619	2.10891	1.82282	1.63066	1.62142	1.53595	1.48021	1.43305	1.42845	1.40203	1.33397	1.32087
2021	7	5	14	35	48	1.40187	1.36545	1.34881	1.52908	1.48833	1.32417	1.52121	1.67216	1.7407	1.86792	2.02487	1.91807	2.03152	2.13283	2.16515	2.17842	2.31047	2.35749	2.35171	2.10581	1.82424	1.7085	1.76486	1.7365	1.55923	1.4988	1.48419	1.45966	1.51522
2021	7	7	13	45	56	1.25564	1.29645	1.33107	1.39181	1.45291	1.487	1.57215	1.66264	1.6845	1.65492	1.81163	1.87366	1.79827	1.73494	1.71116	1.65331	1.57609	1.48461	1.42624	1.39617	1.36388	1.38963	1.37609	1.38452	1.37056	1.33908	1.34892	1.36314	1.36797
2021	7	14	14	11	50	1.38233	1.37283	1.35868	1.39916	0.991213	1.08327	1.03681	1.06937	1.07853	1.10913	1.38876	1.73596	1.95847	1.97112	2.07117	2.03895	1.98872	1.90575	1.90103	1.81631	1.71355	1.67876	1.63066	1.64656	1.42721	1.30183	1.17716	0.943571	0.910801
2021	7	15	13	45	26	0.605682	0.637757	0.679199	0.643741	0.729552	0.636753	0.679199	0.736255	0.76068	0.777924	1.02174	1.21788	1.24673	1.37475	1.4682	1.46342	1.46629	1.53319	1.50968	1.45544	1.18886	0.829491	0.554028	0.449094	0.422032	0.366361	0.450554	0.388416	0.366361
2021	7	16	14	12	38	0.74134	0.725841	0.803891	0.802895	0.80885	0.694241	0.824	1.26463	1.31521	1.36035	1.69241	1.54406	1.59832	1.56941	1.5552	1.60414	1.58825	1.58672	1.17768	1.09594	0.993027	0.878886	0.829298	0.832648	0.742433	0.71738	0.740246	0.75111	0.73695
2021	7	19	14	22	36	1.39059	1.38806	1.39565	1.40071	1.42782	1.49326	1.37062	1.3868	1.40797	1.60207	1.7238	1.74603	1.72174	1.65599	1.66328	1.68232	1.73835	1.34385	1.27681	1.30715	1.26627	1.28599	1.24336	1.21336	1.22353	1.22758	1.21234	1.22387	1.24436
2021	7	20	14	34	49	1.11019	1.12543	1.06517	1.09811	1.17926	1.17612	1.14652	1.09418	1.2024	1.30162	1.48994	1.53631	1.64762	1.59961	1.59255	1.63755	1.63363	1.4923	1.32691	1.37068	1.25872	1.26299	1.18277	1.10676	1.10158	1.04341	0.998176	1.13996	1.21373
2021	7	27	14	13	11	0.955668	0.954067	1.00234	0.98975	0.945616	0.973073	0.923475	1.03583	0.977759	1.06679	1.04638	0.962038	1.02591	1.02146	1.05967	1.03143	1.01849	1.1143	1.09788	1.22303	1.44285	1.51145	1.49529	1.51498	1.3921	1.29897	1.24548	1.20917	1.19582
2021	7	28	13	46	32	0.785624	0.794277	0.835649	0.793418	0.779486	0.766099	0.673718	0.628924	0.684342	0.665062	0.703956	0.741146	0.835649	1.0818	1.1359	1.09358	1.06097	1.1036	1.15961	1.12985	0.973801	0.846714	0.796847	0.753303	0.722873	0.839626	0.766099	0.791696	0.807849
2021	8	1	13	46	51	No Data	No Data	1.0117	1.0628	0.942674	0.982653	1.04188	1.00174	1.01906	1.06223	1.09087	1.05126	1.24316	1.39596	1.5376	1.63086	1.70896	1.68239	1.5678	1.43055	1.01906	0.998597	0.950876	0.92452	0.910179	0.965639	0.893253	0.985231	0.985873
2021	8	2	14	11	6	0.811179	0.807374	0.886688	0.903578	0.9744	1.0455	1.1545	1.40259	1.4555	1.37313	1.50611	1.46387	1.33844	1.17912	1.0488	1.03171	1.06653	1.12679	1.08578	1.11844	1.07161	0.920651	0.911335	0.830511	0.849326	0.827429	0.809913	0.782768	0.800985
2021	8	3	11	33	55	1.4212	1.44815	1.44209	1.44411	1.45084	1.48387	1.43198	1.53191	1.4468	1.48656	1.52987	1.51089	1.54961	1.75503	1.95093	1.88606	1.78656	1.9148	1.83431	1.83269	1.86571	1.82299	1.83839	1.69047	1.52783	1.6179	1.48454	1.54143	1.44815
2021	8	6	14	34	19	0.966433	0.889181	0.925456	0.87199	0.953422	0.817147	0.770261	0.849924	1.00443	1.4584	1.63689	1.60967	1.60222	1.62811	1.61215	1.55213	1.43531	1.3762	1.2289	1.1422	1.00637	0.934197	0.898456	0.839205	0.892676	0.846792	0.73842	0.72295	0.717429
2021	8	9	14	13	13	0.845536	1.04031	0.955556	1.08618	1.0388	1.04935	1.13747	1.09339	1.17095	1.61692	1.78095	1.77816	1.69896	1.6934	1.70554	1.59161	1.55451	1.51807	1.44572	1.3074	1.32795	1.28196	1.29519	1.26293	1.24435	1.2511	1.13747	1.1225	1.0749
2021	8	11	14	10	47	0.755379	0.78665	0.835915	0.785146	0.840099	0.873617	0.926632	0.959444	0.939345	0.879351	0.836381	0.868285	0.887653	0.857956	0.913713	1.07663	1.06323	1.16401	1.34753	1.38324	1.32045	1.38119	1.25162	1.27185	1.22836	1.02855	0.994088	0.951463	0.721979
2021	8	25	13	44	4	1.02078	1.03286	1.01568	1.00951	1.0403	1.03534	1.06406	1.08426	1.11731	1.11242	1.10706	1.16494	1.26487	1.57214	1.67157	1.71283	1.75094	1.78423	1.76241	1.70873	1.74389	1.69469	1.68328	1.71078	1.68416	1.75123	1.75976	1.68591	1.44479
2021	8	29	13	45	59	0.867771	0.861893	0.877439	0.882531	0.939911	0.960885	1.00347	1.03953	1.06046	1.23473	1.55479	1.72949	1.8944	1.88791	1.87837	1.76337	1.69189	1.72008	1.71127	1.64399	1.58177	1.41428	1.09234	1.02856	0.945078	0.955847	0.981723	0.935282	0.939334
2021	8	30	14	12	21	0.819738	0.86512	0.836534	0.855133	0.868132	0.855133	0.729961	0.861661	0.824773	0.814666	0.769223	0.835636	0.793519	1.06759	1.22084	1.31319	1.37817	1.39517	1.38044	1.33479	1.37845	1.42879	1.40338	1.33135	1.24038	1.09051	0.793042	0.755219	0.689245
2021	9	1	11	29	21	0.850746	0.897418	0.826825	0.770109	0.841728	0.857438	0.836033	0.732548	0.946389	0.900569	0.850746	0.876072	0.856327	0.862967	0.802063	0.859654	1.08724	1.59502	1.62699	1.57368	1.49168	1.58985	1.43775	1.3445	1.4068	1.45428	1.37792	1.30559	1.22275
2021	9	3	14	13	28	0.884622	0.854092	0.881722	0.831616	0.840897	0.797031	0.900848	0.927305	0.874912	0.959077	1.3042	1.45154	1.5716	1.60597	1.6475	1.7075	1.69127	1.60005	1.44578	1.39152	1.33117	1.19024	1.16681	1.19937	1.18601	1.1108	1.08157	1.13454	1.07035
2021	9	5	13	58	1	1.08247	1.11776	1.07823	1.23094	1.20808	1.22195	1.23599	1.2243	1.16882	1.34523	1.63679	1.70999	1.67802	1.70289	1.58056	1.47445	1.41497	1.46178	1.67269	1.72066	1.59439	1.46242	1.43872	1.48515	1.43031	1.42511	1.40212	1.37231	1.30099
2021	9	7	13	44	34	0.61634	0.612039	0.604426	0.558588	0.624834	0.621665	0.63319	0.653508	0.671141	0.678791	0.682575	0.592228	0.636289	0.761312	0.830867	0.808876	0.804373	0.782085	0.799834	0.766176	0.753109	0.752282	0.650511	0.661419	0.73547	1.15054	1.27773	1.24092	1.24408
2021	9	12	14	33	48	1.089	1.18248	1.18993	1.14487	1.18604	1.17675	1.22829	1.24702	1.25329	1.31042	1.26017	1.2546	1.21467	1.29981	1.29699	1.39838	1.43499	1.5033	1.47783	1.33069	1.30107	1.28752	1.27763	1.31382	1.38363	1.3428	1.3625	1.33069	1.3503
2021	9	16	14	23	38	0.830407	0.706138	0.673157	0.783965	0.699682	0.75289	0.677659	0.626177	0.662521	1.29738	1.3211	1.39083	1.20292	1.3023	1.51763	1.54084	1.42533	1.33568	1.23911	1.09012	1.00587	0.966183	0.858793	0.927151	0.897523	0.889935	0.930777	0.997308	1.07699
2021	9	17	14	24	4	0.687622	0.84374	0.932948	1.01036	1.02141	0.892746	1.09772	1.17089	1.13302	1.13887	1.16233	1.24916	0.853807	0.812652	0.963025	0.909169	0.781206	0.812652	0.814239	0.793306	0.782315	0.772828	0.74762	0.735235	0.74937	0.778982	0.77339	0.801972	0.850802
2021	9	19	13	43	58	0.279768	0.353313	0.424581	0.412385	0.511242	0.291856	0.401454	0.482689	0.502335	0.511242	0.532231	0.587141	0.570616	0.566116	0.491955	0.580596	0.57285	0.580596	0.604195	0.785052	0.945488	0.94036	0.845138	0.617645	0.634718	0.471881	0.403031	0.367085	0.401454
2021	9	21	13	46	32	0.619003	0.581795	0.65665	0.534205	0.613698	0.69996	0.59524	0.685296	0.67592	0.614763	0.772579	0.79047	0.880215	0.840259	0.87297	0.854113	0.731552	0.74585	0.680628	0.659586	0.576087	0.57952	0.496625	0.503311	0.359087	0.398551	0.487109	0.461758	0.428871
2021	9	22	13	48	19	0.598402	0.523019	0.471901	0.524231	0.504464	0.724043	0.876223	0.969606	0.961477	0.963655	0.920921	0.783197	0.635687	0.614858	0.683933	0.796324	0.712407	0.777261	0.803486	0.832613	0.95655	0.943778	0.839334	0.857747	0.789069	0.808445	0.748949	0.759064	0.793433
2021	9	23	13	57	52	0.518659	0.571387	0.467765	0.415452	0.371719	0.259715	0.332538	0.249233	0.261783	0.353382	0.515018	0.577874	0.712319	0.669142	0.599946	0.516235	0.587451	0.48099	0.413957	0.530604	0.390952	0.31628	0.242829	0.225309	0.293693	0.185726	0.190563	0.197723	0.225309
2021	9	25	14	32	59	0.841908	0.809023	0.853984	0.797833	0.786416	0.764855	0.805318	0.78449	0.776067	0.793421	0.788335	0.772136	0.788973	0.723341	0.787056	0.800339	0.772793	0.777371	0.813316	0.825404	0.836068	0.848265	0.813316	0.828386	0.818787	0.860773	0.852274	0.826001	0.781266
2021	9	28	13	59	23	0.665453	0.800175	0.864636	0.736607	0.700172	0.762044	0.82226	0.953993	0.936921	0.861579	0.801538	0.791231	0.848559	1.00602	0.84162	0.615901	0.542475	0.492147	0.427722	0.472029	0.520864	0.511475	0.470744	0.457703	0.5197	0.515017	0.524339	0.545804	0.488437
2021	9	29	14	33	56	0.835692	0.759224	0.88388	0.901048	0.910493	0.986809	1.02137	1.15443	1.14602	1.13827	1.26369	1.27103	1.3185	1.4312	1.30354	1.21097	1.15915	1.14823	1.07516	1.05962	1.06825	1.0433	1.02832	1.0183	0.888759	0.795914	0.666318	0.734984	0.611127
2021	9	30	14	11	55	0.598058	0.604917	0.518142	0.610346	0.548334	0.493733	0.62502	0.608994	0.623041	0.601498	0.645729	0.638692	0.683319	0.768649	0.727696	0.64318	0.690448	0.732684	0.78719	0.737085	0.776438	0.75812	0.737085	0.722108	0.693981	0.600124	0.634818	0.647634	0.584088
2021	10	11	13	55	16	1.01426	1.03673	1.0206	1.02113	1.07081	1.05798	1.0863	1.14204	1.13715	1.12316	1.29574	1.34518	1.43295	1.49575	1.54691	1.48002	1.48839	1.64352	1.81263	1.7556	1.51895	1.52841	1.5199	1.37083	1.07326	1.02008	0.998663	1.01955	0.993198
2021	10	13	15	3	48	0.924421	1.04962	1.0511	1.13689	1.241	1.25951	1.25919	1.3032	1.34615	1.45153	1.51688	1.57769	1.68901	1.72778	1.72579	1.76387	1.76148	1.73178	1.76216	1.66965	1.75128	1.73078	1.74925	1.5919	1.57677	1.61085	1.62996	1.67995	1.53878
2021	10	16	13	44	5	0.341085	0.28385	0.451777	0.435259	0.438304	0.495527	0.570576	0.54435	0.575202	0.640982	0.63076	0.60753	0.720655	0.948026	1.30561	1.4073	1.53934	1.51677	1.42768	1.35546	1.39819	1.33315	1.32669	1.30415	1.25363	1.2161	1.16451	1.20921	1.05473
2021	10	17	14	24	37	No Data	0.155321	0.008391	0.183517	0.173752	0.26765	0.259443	No Data	0.127181	0.118037	0.158725	0.175394	0.260821	0.071514	0.085561	0.178659	0.21016	0.217726	0.231056	0.143213	0.242609	0.355726	0.380175	0.354587	0.442482	0.474255	0.516135	0.393036	0.299184
2021	10	20	14	33	33	0.664081	0.707254	0.678587	0.738237	0.833419	0.784409	0.755281	0.753088	0.83532	1.04577	0.921054	0.747196	0.726057	0.708846	0.704856	0.816679	0.789918	0.85643	0.869096	0.834687	0.812087	0.840357	0.791287	0.778145	0.753088	0.729893	0.658864	0.680268	0.696786
2021	10	23	14	34	21	0.781375	0.84964	0.747218	0.755405	0.740427	0.778549	0.728139	0.729691	0.636836	0.735085	0.743456	0.887722	1.2303	1.33323	1.15806	1.15414	1.14543	1.05819	1.04462	1.08458	1.07589	1.19028	0.914619	0.926261	0.929	0.831235	0.842728	0.774996	0.824749
2021	10	24	14	29	54	1.03183	1.00537	1.04445	1.07161	1.11131	1.05465	0.976815	0.96985	1.00868	1.10108	1.39041	1.46436	1.42138	1.29768	1.27953	1.13965	0.963313	0.869012	0.847982	0.806767	0.846144	0.82743	0.786002	0.817192	0.815252	0.824887	0.812004	0.918258	0.953122
2021	10	28	13	45	34	0.756392	0.764207	0.724886	0.750235	0.731336	0.763344	0.769356	0.771913	0.778672	0.801704	0.794404	0.804918	0.863487	0.810498	0.75464	0.747575	0.74935	0.728581	0.774457	0.770209	0.77361	0.730419	0.744008	0.752882	0.752001	0.752882	0.746686	0.800897	0.750235
2021	10	29	13	55	58	0.586981	0.561194	0.520532	0.629458	0.549726	0.613797	0.58217	0.61266	0.544543	0.702342	1.1754	1.27358	1.24869	1.19454	0.973659	0.736687	0.626142	0.608086	0.700421	0.637113	0.527319	0.525969	0.628355	0.665627	0.729444	0.597643	0.548435	0.573638	0.617193
2021	10	30	13	46	26	0.584242	0.678079	0.693711	0.778232	0.897399	1.02411	0.992413	0.959662	0.906159	0.920888	0.893605	0.936453	1.10851	1.11262	1.13591	1.15895	0.932896	0.780553	0.768849	0.697323	0.702696	0.642358	0.649306	0.644353	0.606145	0.624052	0.669611	0.638346	0.605072
2021	11	2	14	10	7	0.672641	0.60385	0.657457	0.655532	0.619086	0.673265	0.695331	0.715473	0.763199	0.727599	1.15749	1.36793	1.45167	1.32573	1.24579	1.19229	1.31635	1.3599	1.36269	1.09	1.07507	1.12562	1.06586	0.974777	0.804649	0.684397	0.716056	0.673889	0.701919
2021	11	3	13	44	31	0.619166	0.694893	0.706018	0.65345	0.576041	0.70099	0.650121	0.627371	0.670849	0.634302	0.753865	0.704012	0.778929	0.827513	0.957981	1.11769	1.35209	1.46738	1.47027	1.43012	1.43086	1.24859	1.10587	0.938323	0.905504	0.875244	0.927578	0.886954	0.845682
2021	11	4	14	8	19	0.830423	0.814587	0.820851	0.8754	0.848642	0.873295	0.842071	0.791907	0.835993	0.835993	0.812295	0.829864	1.02369	1.02149	1.2642	1.35314	1.32346	1.32984	1.43132	1.37664	1.33692	1.19407	1.09288	1.07382	1.03939	1.00683	0.962314	0.856233	0.838209
2021	11	6	13	43	50	0.747388	0.771369	0.794352	0.846955	0.805118	0.883314	0.959476	1.17765	1.32295	1.57529	1.63031	1.64397	1.59695	1.53247	1.57624	1.55951	1.44722	1.27696	1.19768	1.18238	1.13512	1.10683	1.04621	1.007	1.01568	0.982546	0.913158	0.869176	0.856084
2021	11	8	14	32	23	0.71174	0.677405	0.722976	0.721385	0.694431	0.745531	0.71979	0.792243	0.792943	0.71578	0.763515	0.765722	0.753097	0.770838	0.733204	0.762039	0.788028	0.846908	0.839228	0.835997	0.839872	0.915818	0.855114	0.865674	0.824876	0.84244	0.810831	0.828826	0.7852
2021	11	11	15	6	9	0.787143	0.715744	0.711825	0.706563	0.873673	0.906487	0.81177	0.8895	1.0033	1.106	1.20684	1.3492	1.26728	1.22625	1.2977	1.34437	1.39964	1.43815	1.47592	1.47251	1.41533	1.11037	1.07331	1.19649	1.08917	0.890005	0.47782	0.424024	0.429441
2021	11	13	15	8	22	0.675879	0.711112	0.694706	0.781236	0.639182	0.744469	0.860339	0.893045	0.99266	1.00151	1.17613	1.20517	1.39615	1.34977	1.2763	1.35731	1.51129	1.35207	1.06553	0.926244	0.804307	0.834431	1.02428	0.81768	0.697895	0.696622	0.599309	0.631421	0.639182
2021	11	19	13	43	46	0.909886	0.871483	0.941063	0.858648	0.82783	0.873068	0.873068	0.843029	0.868301	0.865101	0.825258	0.870689	0.877012	0.881709	1.03489	0.988041	1.00104	1.10353	1.19389	1.29147	1.34546	1.34883	1.42418	1.32848	1.25026	1.15651	1.08215	1.00168	0.994571
2021	11	23	14	12	36	0.708827	0.69215	0.662362	0.645075	0.667312	0.689439	0.631772	0.636981	0.675704	0.793782	1.21788	1.28584	1.21201	1.12956	0.996933	0.865614	0.480266	0.479285	0.478304	0.438532	0.524436	0.488042	0.396663	0.51625	0.5628	0.456235	0.478304	0.403502	0.445894
2021	11	26	13	46	24	0.695576	0.655573	0.624998	0.731747	0.736866	0.742947	0.713967	0.751942	0.761765	0.77523	0.731747	0.757857	0.767576	0.807527	0.796662	0.734824	0.751942	0.782779	0.797576	0.729685	0.766612	0.731747	0.684453	0.671941	0.734824	0.675383	0.675383	0.613532	0.678803
2021	11	28	13	43	32	0.629527	0.640965	1.08551	1.26499	1.24557	1.43637	1.45503	1.51722	1.57113	1.56837	1.60982	1.61969	1.78076	1.72955	1.75188	1.738	1.2836	1.25295	1.27729	1.2684	1.25684	1.14778	1.11627	1.06935	1.02549	0.969757	0.915608	0.913533	0.873438
2021	12	6	14	15	18	0.461687	0.589674	0.413383	0.430798	0.48979	0.46284	0.447654	0.515459	0.423405	0.543962	0.557682	0.540977	0.470841	0.624297	0.786792	0.85806	0.954859	1.0654	1.10238	1.19178	1.04545	0.978896	0.817957	0.664282	0.466284	0.460532	0.446468	0.358737	0.316225
2021	12	9	14	12	30	0.566379	0.596011	0.547824	0.541499	0.591871	0.555851	0.501949	0.546924	0.587701	0.665904	0.690314	0.783704	1.06133	1.1734	1.26008	1.41109	1.30957	0.87958	0.748087	0.733802	0.722541	0.586863	0.476968	0.507777	0.648814	0.601758	0.63663	0.642753	0.480027
2021	12	11	13	42	45	0.730286	0.671828	0.734158	0.719491	0.723441	0.692036	0.704413	0.762354	0.770538	0.808054	0.846395	0.880122	0.919054	1.06113	1.08377	1.16062	1.12137	1.02838	0.943689	0.821397	0.820573	0.729313	0.728339	0.741821	0.689945	0.713511	0.639402	0.614589	0.593585
2021	12	12	13	44	13	0.868189	0.835061	0.837491	0.862797	0.845518	0.881832	0.896632	0.87505	0.9125	0.943726	1.05357	1.49538	1.65993	1.62051	1.38341	1.04261	1.02851	0.953128	0.962392	1.0356	1.05528	1.02732	0.941014	0.946427	0.943726	0.897362	0.923786	0.929351	0.872772
2021	12	22	13	43	46	0.445491	0.471518	0.429179	0.47823	0.456068	0.372523	0.521295	0.459544	0.484853	0.516691	0.735228	1.03057	0.976109	0.955738	0.866777	0.597657	0.466422	0.499434	0.436496	0.443705	0.501028	0.340357	0.510485	0.414204	0.370444	0.441913	0.456068	0.512044	0.402659
2021	12	25	13	43	20	0.892571	0.916665	0.987726	1.08163	1.13953	1.26203	1.33161	1.44806	1.4841	1.58268	1.65637	1.69837	1.67484	1.66905	1.53895	1.13313	0.857765	0.68335	0.642706	0.593316	0.523569	0.531147	0.591985	0.483836	0.538613	0.567406	0.563191	0.58797	0.529641
2021	12	26	14	28	42	0.43423	0.445279	0.532276	0.550256	0.592582	0.541347	0.504026	0.499855	0.600639	0.541347	0.744418	0.882317	1.08189	1.24809	1.33956	1.36634	1.44206	1.44069	0.927567	0.325407	0.29861	0.283523	0.25879	0.343108	0.205005	0.164395	0.265666	0.167217	0.267935
2021	12	29	13	45	26	0.150135	0.269883	0.185419	0.321068	0.275006	0.309377	0.350181	0.133158	0.294953	0.360919	0.391757	0.397693	0.722283	0.751457	0.689241	0.576766	0.600791	0.644505	0.504883	0.565712	0.451599	0.383726	0.399656	0.334728	0.411266	0.323373	0.297388	0.383726	0.262094
2021	12	31	13	55	39	0.365791	0.383799	0.397351	0.421549	0.430543	0.63012	0.767132	0.732837	0.780813	0.859711	0.912918	0.969733	0.910043	1.05201	1.15671	0.634876	0.732837	0.638414	0.581284	0.639588	0.604404	0.61312	0.521348	0.572001	0.5345	0.530154	0.45825	0.41973	0.406802
2022	1	7	14	8	55	0.691902	0.679147	0.623586	0.676868	0.690415	0.62192	0.762092	0.718786	0.664568	0.70875	0.755409	0.66998	0.754064	0.856884	0.953121	1.15192	1.23009	0.93709	0.859199	0.731461	0.724451	0.745936	0.811423	0.722333	0.764084	0.732854	0.724451	0.673817	0.780452
2022	1	11	14	32	53	0.196209	0.206882	0.24969	0.295489	0.291105	0.327129	0.417878	0.539688	0.581352	0.576481	0.763471	0.952906	1.16112	1.21791	1.48217	1.55002	1.61129	1.52541	1.53142	1.39839	1.30032	1.0199	0.85718	0.746053	0.611921	0.637522	0.66912	0.584974	0.55011
2022	1	21	15	11	29	0.600203	0.431599	0.407011	0.52668	0.711753	0.79418	0.315382	0.268809	0.437287	0.175408	0.394881	0.631307	0.809382	0.815966	0.867645	0.736394	0.601882	0.522834	0.444033	0.462691	0.431599	0.487969	0.457271	0.458359	0.555618	0.682453	0.47231	0.517988	0.448482
2022	1	23	14	32	45	0.473097	0.380434	0.399113	0.303552	0.338847	0.405729	0.410633	0.348202	0.491343	0.518157	0.564247	0.470229	0.355555	0.249678	0.223853	0.382163	0.346346	0.309621	0.335053	0.35919	0.555846	0.452657	0.614082	0.52076	0.435973	No Data	0.172868	0.297404	0.046448
2022	1	30	14	9	58	0.745088	0.642093	0.750649	0.740282	0.723998	0.780039	0.745885	0.79426	1.05678	1.29354	1.33153	1.35188	1.27954	1.10169	1.05678	0.942256	0.821125	0.825385	0.756163	0.795	0.787561	0.786064	0.761631	0.712344	0.767825	0.683098	0.613094	0.746682	0.771666
2022	2	2	14	8	18	0.173769	0.178021	0.169478	0.304164	0.196706	0.226333	0.280701	0.374353	0.263236	0.254267	0.515851	0.581586	0.631675	0.603454	0.642244	0.654341	0.67204	0.74924	0.688428	0.681926	0.653486	0.554792	0.374353	0.555808	0.661991	0.659452	0.658603	0.60252	0.518028
2022	2	3	14	10	38	No Data	No Data	No Data	No Data	No Data	No Data	0.534718	0.567233	No Data	No Data	No Data	No Data	No Data	No Data	No Data	No Data	No Data	0.816427	0.802599	0.806661	0.861184	No Data	No Data	No Data	No Data	0.643839	0.67799	0.710997	0.564666
2022	2	4	14	31	22	0.581814	0.55728	0.527864	0.580725	0.67056	0.608326	0.605217	0.659444	0.611417	0.69299	0.562962	0.628589	0.622594	0.67056	0.626598	0.731943	0.719549	0.730306	0.785583	0.769042	0.761356	0.739245	0.675122	0.696492	0.647129	0.637454	0.689464	0.641346	0.679646
2022	2	5	13	44	47	0.323446	0.175631	0.318897	0.311989	0.280826	0.211491	0.178728	0.047414	0.211491	0.33019	0.297862	0.345561	0.531494	0.624106	0.795526	0.824186	0.914955	0.766259	0.741279	0.437653	0.283298	0.302618	0.108866	0.017677	0.311989	0.231195	0.136747	0.063571	0.140116
2022	2	6	14	6	28	0.871793	0.850587	0.837012	0.869175	0.895453	0.931572	0.933987	1.00516	1.08068	No Data	No Data	0.956345	0.967534	0.969385	0.991291	1.03915	1.00914	1.01047	0.922329	0.982686	0.964751	1.02709	1.01531	0.985412	0.887819	0.913473	0.909504	0.891391	0.915943
2022	2	10	13	40	9	No Data	0.145595	0.33229	0.242932	0.240264	0.273817	0.334485	0.305126	0.263747	0.266285	0.250847	0.278771	0.242932	0.266285	0.221145	0.295713	0.370323	0.266285	0.261195	0.30279	0.276301	0.186418	0.183402	0.281229	0.237581	0.261195	0.268809	0.250847	0.263747
2022	2	19	14	32	10	0.250608	0.446003	0.47708	0.468401	0.549	0.59063	0.628046	0.633325	0.603037	0.557606	0.59177	0.630164	0.524867	0.523563	0.484197	0.516996	0.34431	0.36101	0.465473	0.581412	No Data	No Data	No Data	No Data	No Data	No Data	No Data	No Data	No Data
2022	2	20	14	32	12	1.06528	1.02153	1.01113	1.03128	1.04707	1.04232	1.12621	1.11554	1.18496	1.26815	1.33262	1.44002	1.57499	1.6601	1.63531	1.71866	1.76113	1.74172	1.77314	1.71411	1.57528	1.5631	1.54238	1.45141	1.32554	1.0662	0.927041	0.879681	0.864708
2022	2	22	14	28	2	0.861694	0.814974	0.905587	0.939864	0.954836	0.964815	0.956018	0.931934	0.926383	0.959552	1.01412	0.978071	0.891314	0.9239	0.934385	0.883382	0.868558	0.88205	0.89197	0.895892	0.887361	0.849836	0.904946	0.921407	0.898493	0.939864	0.873992	0.889341	0.920156
2022	2	24	14	8	20	0.767392	0.750372	0.75837	0.77905	0.788883	0.849086	0.80549	0.80337	0.792669	0.843593	0.810237	0.813906	0.872583	0.887843	0.868234	0.83095	0.810762	0.891141	0.789425	0.861418	0.78015	0.709433	0.679935	0.685057	0.757802	0.716745	0.678648	0.669562	0.672822
2022	3	2	13	42	42	0.274656	0.172164	0.27235	0.191813	0.183494	0.226229	0.30795	0.362535	0.330952	0.339047	0.448027	0.579219	0.789482	0.996429	1.14499	0.997013	0.700082	0.636071	0.573044	0.576758	0.498138	0.62609	0.648014	0.631659	0.64262	0.648014	0.720118	0.728481	0.748395
2022	3	4	13	41	34	0.341862	0.251051	0.210212	0.22595	0.147443	0.125534	0.248601	0.22595	0.272543	0.228522	0.380543	0.387917	0.41633	0.562767	0.525557	0.672933	0.591399	0.658258	0.606895	0.639865	0.727873	0.61157	0.448034	0.468592	0.474747	0.448034	0.502977	0.562767	0.597415
2022	3	9	13	38	39	No Data	No Data	No Data	No Data	No Data	No Data	No Data	No Data	No Data	No Data	No Data	No Data	No Data	No Data	No Data	No Data	No Data	No Data	0.943495	0.838287	0.787802	0.779615	0.785358	0.749097	No Data	No Data	No Data	No Data	No Data
2022	3	21	14	31	24	0.815751	0.835781	0.900032	0.891437	0.831319	0.820988	0.863062	0.892013	0.919622	0.942857	0.935388	0.885637	0.954416	0.923465	0.941796	0.860634	0.85329	0.761222	0.84335	0.861242	0.848341	0.842096	0.822939	0.855749	0.807136	0.777657	0.819683	0.769143	0.850821
2022	3	26	13	39	5	0.573724	0.681842	0.67618	0.587426	0.692987	0.689298	0.737916	0.82165	0.789499	0.731967	0.775473	0.82165	0.82455	0.820923	0.809157	0.806924	0.799414	0.735374	0.708386	0.755381	0.845843	0.779404	0.825272	0.693905	0.677127	0.735374	0.686514	0.606225	0.55124
2022	3	28	14	10	0	0.299125	0.25597	0.39392	0.379902	0.328196	0.459817	0.36546	0.368707	0.392382	0.419331	0.510664	0.448981	0.360547	0.437899	0.386182	0.442085	0.536547	0.629464	0.626593	0.660936	0.675987	0.590824	0.601013	0.534249	0.585651	0.661833	0.634214	0.554561	0.489693
2022	4	4	13	39	48	0.728071	0.638116	0.434416	0.428228	0.443552	0.392701	0.437481	0.228059	0.379102	0.499096	0.477066	0.568129	0.617256	0.631946	0.697018	0.653227	0.757431	0.759062	0.70066	0.768747	1.00951	0.93781	0.899569	0.759062	0.829328	0.862799	0.595511	0.709657	0.710548
2022	4	10	13	53	3	0.540846	0.450545	0.634211	0.67232	0.659593	0.677133	0.691316	0.664525	0.888914	0.881667	0.903149	0.819468	0.849655	0.873658	0.878343	0.894778	0.927585	0.793026	0.82753	0.770127	0.784451	0.797648	0.72651	0.83476	No Data	No Data	No Data	No Data	No Data
2022	4	21	13	36	9	0.940806	0.822889	0.805433	0.823576	0.815971	0.832435	0.791068	0.843153	0.831081	0.804013	0.770315	0.652665	0.887854	0.864012	0.849096	0.81944	0.83446	0.959134	1.01568	0.985927	0.92943	0.898822	0.901232	0.986452	0.90662	0.920175	0.830403	0.820131	0.806849
2022	4	23	14	10	37	0.582321	0.551297	0.418359	0.294201	0.453037	0.418359	0.326146	0.340463	0.296141	0.561479	0.627538	0.634378	0.742745	0.76597	0.730749	0.634378	0.623588	0.655304	0.638246	0.64968	0.595056	0.643995	0.518226	0.53029	0.441751	0.53029	0.59819	0.647792	0.66179
2022	4	24	13	39	0	0.524122	0.438214	0.47766	0.480359	0.559774	0.833759	0.772984	0.899835	0.714987	0.601588	0.517924	0.536291	0.473583	0.512909	0.545817	0.583307	0.520412	0.530243	0.539884	0.724259	0.70728	0.804914	0.709002	0.591991	0.585492	0.629342	0.654728	0.574471	0.586581
2022	5	1	13	40	12	0.703341	0.766791	0.709429	0.659757	0.627756	0.620633	0.550233	0.689908	0.630108	0.686759	0.665269	0.594892	0.675048	0.651939	0.743624	No Data	No Data	No Data	No Data	No Data	No Data	No Data	No Data	No Data	No Data	No Data	No Data	No Data	No Data
2022	5	30	14	9	52	0.672208	0.632318	0.64663	0.635418	0.607907	0.663495	0.762099	0.682664	0.755566	0.766144	0.700251	0.657605	0.563641	0.51248	0.420215	0.434294	0.243548	0.348438	0.370068	0.378798	0.412212	0.500508	0.708382	0.654635	No Data	No Data	No Data	No Data	No Data
2022	6	4	14	11	16	No Data	No Data	No Data	No Data	0.827573	0.808979	0.7053	0.67825	0.639868	0.78975	0.844895	0.911274	0.997084	1.02669	1.06808	1.10533	1.17464	1.14681	1.27276	1.40772	1.32749	1.32994	1.12812	1.17795	1.18821	1.10397	1.09482	1.00815	0.986368
2022	6	23	14	10	53	1.16641	1.13681	1.0178	0.999974	1.02449	1.03162	1.08097	1.14073	1.06087	1.17354	1.19252	1.2343	1.21107	1.29118	1.29629	1.24127	1.28641	1.28531	1.22414	1.24319	1.26185	1.10692	1.05404	1.08191	1.1249	1.06715	0.958268	0.914207	0.855364
2022	6	25	13	40	52	0.917074	0.930319	0.891591	0.817225	0.873541	0.92853	1.042	0.96224	0.970671	0.954268	0.835685	0.851533	0.904778	0.974568	0.935656	0.926735	0.889046	0.915856	0.88649	0.904156	1.0666	1.14141	0.936836	0.920715	0.941532	0.936246	0.901664	0.955413	0.920715
2022	7	14	14	22	48	0.920578	0.878406	0.943802	0.957434	0.912823	0.914493	0.895288	0.951703	0.993723	1.05411	1.18308	1.22212	1.30474	1.24803	1.2293	1.19988	1.17131	1.11624	1.01778	1.01541	1.01683	0.907784	0.931489	0.883697	0.823333	0.830431	0.870081	0.822033	0.843743
2022	7	24	14	10	37	0.533929	0.490774	0.555877	0.635221	0.512205	0.524392	0.500976	0.412698	0.544446	0.644802	0.781288	0.813444	0.776856	0.691103	0.649527	0.614502	0.838576	0.776856	0.590805	0.595006	0.42465	0.458832	0.504747	0.507246	0.552476	0.545601	0.653277	0.479039	0.431973
2022	7	28	13	40	38	0.684804	0.976215	1.15818	1.1901	1.25248	1.27466	1.23459	1.31535	1.3362	1.31461	1.38618	1.15333	1.03347	0.924557	0.744781	0.724939	0.842383	0.902488	0.830161	0.852956	0.951217	1.0576	1.1049	0.964711	0.998072	0.869481	0.906967	0.791834	0.954175
2022	7	30	14	20	42	0.816318	0.796677	0.841065	0.897513	0.909547	0.936188	0.961204	0.906703	1.00554	1.00651	1.05163	0.960159	0.983754	0.932374	0.95649	0.884049	0.891111	0.896354	0.884641	0.900976	0.927436	0.880486	0.83915	0.795296	0.78413	0.778461	0.795296	0.795987	0.800797
2022	8	5	13	36	26	No Data	No Data	No Data	No Data	No Data	No Data	No Data	No Data	No Data	No Data	No Data	No Data	No Data	No Data	No Data	No Data	No Data	No Data	No Data	No Data	No Data	No Data	1.749	1.26378	1.2796	1.29559	1.26679	1.21276	1.17252
2022	8	16	14	10	13	0.64675	0.683399	0.658945	0.762233	0.777307	0.734811	0.738016	0.714335	0.709302	0.730777	0.768312	0.792704	0.738016	0.716002	0.741995	0.720147	0.647698	0.751429	0.723441	0.72426	0.741995	0.755312	0.775818	0.774325	0.731586	0.706768	0.693044	0.688682	0.592762
2022	8	19	13	36	46	0.693933	0.596098	0.580632	0.534873	0.545809	0.573857	0.492583	0.512254	0.551783	0.629783	0.702872	0.699314	0.714272	0.715139	0.661404	0.675592	0.707285	0.665225	0.666176	0.666176	0.61005	0.614268	0.621566	0.634852	0.601509	0.669962	0.689407	0.669962	0.679311
2022	8	24	14	28	38	1.06011	1.18263	1.14227	1.14033	1.11348	1.10742	1.06356	1.09351	1.04876	1.26198	1.77111	1.97346	2.04331	2.05484	2.07093	2.11475	2.11475	2.05578	2.08597	1.96673	1.76497	1.65223	1.51662	1.43277	1.3721	1.28095	1.26366	1.25015	1.19105
2022	9	1	14	27	25	0.353636	0.410088	0.396586	0.384257	0.468544	0.635243	0.60222	0.604223	0.477639	0.547168	0.5765	0.742894	1.05352	0.991667	0.894587	0.88511	0.858234	0.854472	0.820125	0.90565	0.990157	1.06126	0.943125	0.84751	0.703904	0.608205	0.440196	0.51601	0.598191
2022	9	5	14	13	10	1.28082	1.37252	1.43718	1.4572	1.51968	1.54085	1.50036	1.61245	1.73501	1.89103	1.92428	1.90106	1.99892	2.00081	2.07679	2.03216	2.04651	2.09448	1.8482	1.52898	1.38018	1.23768	1.13087	1.09293	1.08767	1.0308	0.996965	0.909731	0.851459
2022	9	8	13	38	23	0.661886	0.625302	0.675085	0.70495	0.72651	0.921515	1.46431	1.55797	1.65272	1.60201	1.61608	1.6539	1.78256	1.78915	1.84387	1.85733	1.85518	2.01772	2.07901	2.06372	1.89853	1.79876	1.43966	0.958798	0.86686	0.929865	0.895125	1.00197	0.984833
2022	9	9	13	37	33	0.44284	0.423088	0.419977	0.558974	0.549471	0.522365	0.595293	0.676204	0.733001	0.926264	1.16636	1.67411	1.7527	1.72367	1.73414	1.73952	1.7626	1.71919	1.6968	1.45663	1.29074	1.1544	1.10143	1.08321	0.989064	0.948097	0.912904	0.818589	0.861651
2022	9	10	13	39	51	0.546707	0.496631	0.542932	0.475378	0.323543	0.443983	0.486827	0.517005	0.639257	0.873616	1.16224	1.14206	1.2872	1.31971	1.39705	1.41298	1.2678	1.13659	1.20788	1.11806	0.910619	0.831935	0.790929	0.790141	0.811804	0.84066	0.817092	0.795636	0.790141
2022	9	11	13	35	46	0.668153	0.598345	0.601585	0.62884	0.615393	0.61224	0.654728	0.714354	0.685839	0.764059	0.770357	0.81037	0.844313	0.936311	0.995788	0.883476	0.941585	0.925626	0.908625	0.946236	1.05324	1.22704	1.4398	1.41527	1.46522	1.43232	1.40434	1.41659	1.39467
2022	9	13	14	27	5	0.846365	0.762352	0.764507	0.81647	0.771628	0.813196	0.793139	0.948047	1.00647	0.909748	0.992964	1.17496	1.74035	1.97791	2.33089	No Data	No Data	No Data	No Data	No Data	No Data	No Data	No Data	2.46612	2.41498	2.28472	2.16879	2.18323	2.07719
2022	9	15	13	39	11	0.640002	0.72192	0.677874	0.693304	0.611149	0.689233	0.601563	0.589321	0.58434	0.673682	0.831297	1.1098	1.26057	1.37055	1.41372	1.48336	1.43935	1.10057	0.75635	0.6298	0.674733	0.595479	0.558674	0.550711	0.572951	0.567806	0.538526	0.553379	0.451863
2022	9	19	14	14	11	0.573767	0.644583	0.632499	0.641819	0.761912	0.88933	0.967215	1.00256	1.07645	1.09386	1.16986	1.18068	1.30434	1.25806	1.132	1.12543	1.30702	1.41797	1.61161	1.66298	1.77313	1.81124	1.89068	1.94937	2.04973	1.99241	1.90954	1.76151	1.64783
2022	9	20	13	39	23	0.686748	0.711766	0.764129	0.778212	0.785121	0.769649	0.597138	0.691303	0.649799	0.626714	0.670961	0.901346	1.36797	1.60423	1.64227	1.6551	1.67744	1.69499	1.67208	1.67297	1.731	1.76683	1.76084	1.79416	1.84793	1.87414	1.89315	1.93175	1.91868
2022	9	25	13	38	36	0.756647	0.873184	0.703545	0.694658	0.709389	0.703545	0.650002	0.720887	0.634597	0.61987	0.749501	0.796853	No Data	No Data	No Data	No Data	0.895856	0.89097	No Data	No Data	No Data	No Data	No Data	No Data	No Data	No Data	No Data	No Data	No Data
2022	10	2	13	56	28	No Data	No Data	No Data	No Data	No Data	No Data	No Data	No Data	No Data	No Data	No Data	No Data	No Data	No Data	No Data	No Data	No Data	No Data	No Data	2.00976	2.04616	2.1961	2.00014	1.75259	1.5252	0.865438	0.85795	0.864761	0.845484
2022	10	17	13	56	52	0.813146	0.778506	0.819087	0.824235	0.861093	0.84508	0.918006	0.91047	0.847897	0.838692	0.859029	1.04273	1.24994	1.27328	1.48245	1.48667	1.5277	1.53119	1.60345	1.58422	1.57581	1.60963	1.65424	1.61056	1.59074	1.55736	1.4077	1.16828	0.558595
2022	10	21	14	14	8	0.633096	0.588364	0.578711	0.511619	0.523848	0.550886	0.651272	0.672459	0.552029	0.699729	0.799658	1.603	1.62898	1.70669	1.84266	1.90178	1.89966	1.89694	1.92219	1.96536	1.90511	1.9311	1.88129	1.87919	1.77621	1.94969	1.83648	1.75057	1.71155
2022	10	22	14	14	7	0.06374	-0.282897	-0.042575	0.378377	0.735522	0.775735	0.89154	0.980416	1.03311	1.10387	1.14663	1.4236	1.73967	1.85431	1.95391	2.07038	2.18607	2.26446	2.16305	2.0774	2.03731	1.92613	1.8795	1.6509	1.3404	1.28513	1.21883	1.26429	1.27202
2022	10	31	14	12	53	0.747504	0.811273	0.949674	0.976757	0.988496	0.975063	1.31307	1.48679	1.77605	1.84757	2.01156	1.99097	2.06499	2.18875	2.31958	2.29031	2.2122	2.2105	2.19372	1.99608	1.63408	1.54672	1.36395	0.959605	0.633513	0.701353	0.770388	0.910163	0.747504
2022	11	6	14	27	0	0.542043	0.470966	0.493645	0.506513	1.18857	1.19017	1.26841	1.32698	1.34715	1.40244	1.42142	1.49197	1.5184	1.56086	1.52021	1.4883	1.46672	1.49259	1.55641	1.60825	1.60328	1.5892	1.63799	1.73622	1.75772	1.74842	1.76791	1.71102	1.66904
2022	11	7	13	39	3	0.69323	0.66206	0.59349	0.670845	0.700486	0.757106	0.760801	0.844432	1.12506	1.73094	1.82672	1.85854	1.90748	1.85462	1.86602	1.91441	1.9499	1.94803	1.92874	1.92027	1.95815	1.90129	1.86245	1.91587	1.87281	1.78135	1.65635	1.6622	1.66427
2022	11	12	13	40	34	0.790721	0.765021	0.802716	0.770437	0.796751	0.896356	1.13862	1.38701	1.37264	1.38043	1.40959	1.39586	1.40389	1.46473	1.45371	1.4713	1.43741	1.40198	1.45629	1.3581	1.35135	1.32886	1.37068	1.26873	1.1849	1.31003	1.16864	0.955409	0.832437
2022	11	14	13	35	28	No Data	No Data	No Data	No Data	No Data	No Data	No Data	0.39049	0.346184	0.34829	0.331175	0.275766	0.333348	0.248006	0.376833	0.425713	0.691942	0.984836	1.076	1.10638	0.998646	1.02662	1.08536	1.21202	1.19274	1.23769	1.34287	1.33511	1.30859
2022	11	17	13	37	16	0.857532	0.922917	0.87553	0.871664	0.892994	0.831527	0.896724	0.882425	0.883947	0.941157	0.955508	1.00112	0.96089	0.902644	0.915033	0.972833	0.96689	0.936996	0.97349	0.9307	0.900431	0.912141	0.889994	0.905582	0.906314	0.892994	0.891496	0.905582	0.925759
2022	11	18	14	11	26	0.745224	0.791673	0.767388	0.806331	0.807776	0.784949	0.781178	0.843437	0.897777	0.957776	1.05303	1.10944	1.05642	1.01717	0.996917	1.03085	1.06792	1.02733	0.918436	0.926742	0.956653	0.891564	0.791673	0.765055	0.719586	0.718738	0.587442	0.608807	0.641243
2022	11	26	14	13	57	0.4169	0.445166	0.517134	0.613305	0.628075	0.666903	0.620174	0.715523	0.845745	0.937261	1.06464	1.17184	1.22515	1.1723	1.16214	1.13521	1.14334	1.06991	1.08551	1.13952	1.07671	1.01181	1.12699	1.30673	1.30831	1.32709	1.32825	1.16631	1.01694
2022	11	30	14	10	15	0.110162	0.035579	0.076163	0.135652	0.035579	0.159799	0.269274	0.357929	0.255126	0.230549	0.336269	0.403782	0.271591	0.285257	0.352119	0.475205	0.44884	0.549366	0.519916	0.569746	0.557105	0.618508	0.656757	0.64933	0.597673	0.64826	0.514369	0.537528	0.580857
2022	12	4	14	29	33	0.63697	0.608286	0.668205	0.690952	0.664147	0.604871	0.685112	0.675233	0.714616	0.622828	0.648642	0.706217	0.719226	0.699592	0.735501	0.708095	0.685112	0.678216	0.719226	0.700544	0.7487	0.691919	0.697684	0.731927	0.698639	0.694809	0.685112	0.701494	0.703388
2022	12	8	13	37	1	No Data	No Data	No Data	No Data	No Data	No Data	No Data	No Data	No Data	No Data	No Data	No Data	No Data	No Data	No Data	No Data	0.907105	0.895316	0.877184	0.846587	0.86835	0.879808	0.832557	0.860284	0.927601	0.840082	No Data	No Data	No Data
2022	12	17	14	14	38	0.642413	0.632082	0.648065	0.672229	0.672229	0.644682	0.675439	0.650309	0.653656	0.626253	0.644682	0.602249	0.584749	0.538152	0.641276	0.641276	0.683906	0.599786	0.533949	0.622723	0.515315	0.605922	0.617978	0.690168	0.675439	0.798805	0.691205	0.792824	0.878015
2022	12	19	14	11	10	0.662052	0.675292	0.653736	0.673277	0.674285	0.66102	0.666162	0.679299	0.680296	0.697931	0.749348	0.740518	0.695032	0.765742	0.744067	0.741407	0.698894	0.709371	0.699855	0.714066	0.690166	0.71872	0.75631	0.691143	0.689187	0.669223	0.668204	0.696967	0.635609
2022	12	27	14	12	54	0.535246	0.505691	0.552173	0.525101	0.573888	0.683481	0.663785	0.590868	0.649085	0.611017	0.501101	0.603554	0.59343	0.606053	0.601042	0.494915	0.547995	0.462756	0.496469	0.520689	0.624422	0.654788	0.646786	0.633957	0.55906	0.684553	0.667119	0.611017	0.526563
2023	1	12	14	12	49	0.269861	0.15813	0.242421	0.12291	0.202191	0.07005	0.170297	0.182151	0.224079	0.35597	0.277074	0.274682	0.475143	0.392863	0.484515	0.38911	0.262536	0.365958	0.379599	0.405769	0.428858	0.392863	0.387224	0.383427	0.383427	0.363977	0.343701	0.284177	0.369896
2023	1	18	13	35	40	0.382989	0.371227	0.469922	0.558534	0.496374	0.315719	0.392194	0.405678	0.464063	0.458132	0.545375	0.490824	0.462094	0.490824	0.535273	0.483326	0.483326	0.496374	0.441957	0.496374	0.45213	0.579209	0.564986	0.588473	0.54035	0.492681	0.548697	0.590001	0.507289
2023	1	25	14	25	11	0.659684	0.604097	0.671709	0.624023	0.65048	0.708075	0.778241	0.700623	0.661707	0.718154	0.716335	0.725367	0.599561	0.592682	0.820505	0.824263	0.811384	0.855601	0.744721	0.768398	0.742989	0.698744	0.721773	0.72087	0.825012	0.770051	0.730714	0.565411	0.569053
2023	1	29	13	36	23	0.711933	0.662014	0.684299	0.714	0.728255	0.678815	0.741162	0.731261	0.733255	0.77998	0.73821	0.746046	0.786343	0.720155	0.780893	0.795309	0.77998	0.75377	0.761387	0.710896	0.709857	0.763275	0.75377	0.726241	0.707773	0.712967	0.719134	0.720155	0.709857
2023	2	6	14	19	23	0.772093	0.72841	0.78211	0.745815	0.813296	0.872931	0.851029	0.829672	0.837341	0.89279	0.894049	0.899058	0.912621	0.849674	0.816179	0.807488	0.811125	0.832473	0.857753	0.812574	0.858421	0.878766	0.808946	0.785156	0.758713	0.742543	0.798662	0.769755	0.77287
2023	2	13	13	33	8	0.22172	0.182715	0.057543	0.19507	0.293586	0.273419	0.238674	0.308163	0.286124	0.426187	0.28361	0.349374	0.358065	0.409073	0.418656	0.387296	0.399296	0.407134	0.344968	0.298495	0.265627	0.489181	0.381181	0.275988	0.273419	0.30093	0.319975	0.329217	0.255032
2023	2	14	13	40	24	0.406611	0.456031	0.503952	0.457706	0.449272	0.508497	0.486919	0.45097	0.472531	0.472531	0.560026	0.599266	0.654132	0.626235	0.691262	0.708893	0.606763	0.58781	0.493181	0.508497	0.480576	0.467639	0.491623	0.578717	0.594206	0.499365	0.494734	0.475765	0.503952
2023	2	15	13	32	48	0.199165	0.043584	0.088688	0.205264	0.231758	0.402603	0.360984	0.329526	0.303254	0.354416	0.298316	0.329526	0.341002	0.331843	0.267547	0.237446	0.360984	0.338729	0.214264	0.378068	0.338729	0.283183	0.324856	0.312977	0.343263	0.369603	0.288282	0.400606	0.278029
2023	2	20	13	37	48	0.468794	0.577014	0.449681	0.51121	0.433466	0.468794	0.468794	0.410964	0.520502	0.47724	0.490459	0.500145	0.426081	0.503332	0.540057	0.518965	0.684221	0.6216	0.688657	0.707105	0.675237	No Data	No Data	No Data	No Data	No Data	No Data	No Data	No Data
2023	2	22	13	41	13	1.06611	1.04759	1.03082	1.03589	1.03364	1.06071	1.05691	1.13036	1.20679	1.13868	1.1274	1.12592	1.13576	1.14499	1.11895	1.13478	1.0899	1.12691	1.20769	1.16549	1.16266	1.21081	1.14112	1.15077	1.22496	1.19507	1.20275	1.18732	1.18364
2023	2	25	13	35	53	0.307747	0.340654	0.492073	0.359355	0.441541	0.413252	0.334253	0.365428	0.514775	0.405913	0.418684	0.477932	0.496698	0.532217	0.605207	0.465011	0.357312	0.578567	0.510318	0.591427	0.570692	0.517725	0.493619	0.508822	0.573331	0.316748	0.585038	0.466645	0.422272
2023	3	5	14	13	48	0.726585	0.676493	0.733373	0.671782	0.706578	0.788658	0.832634	0.895408	0.835448	0.8445	0.788658	0.851368	0.808136	0.876749	0.915345	0.86553	0.829806	0.83685	0.896042	0.892233	0.881955	0.882603	0.903587	0.96365	0.949317	0.939379	0.987024	0.937609	0.941145
2023	3	9	14	12	26	0.513923	0.723449	0.659853	0.557049	0.575487	0.607073	0.448305	0.595602	0.702142	0.588594	0.647417	0.638957	0.640022	0.56327	0.72707	0.772893	0.569416	0.656772	0.504273	0.446742	0.536604	0.568192	0.64426	0.633599	0.407631	0.597917	0.640022	0.580292	0.541794
2023	3	11	13	43	55	1.03942	0.927378	0.909501	0.659308	0.748519	0.803778	0.917014	0.908745	0.861505	0.784402	1.03198	1.02509	1.09622	0.958162	0.879267	0.967865	1.09051	0.938292	1.02256	1.01621	0.91776	1.07252	1.06365	1.01493	1.07837	1.06424	1.2922	1.2913	1.17083
2023	3	16	13	39	29	0.447515	0.475012	0.545489	0.566927	0.420035	0.544199	0.50943	0.577917	0.649908	0.701841	0.609529	0.620758	0.472032	0.544199	0.447515	0.413336	0.503858	0.544199	0.491086	0.537698	0.464502	0.563209	0.43154	0.55189	0.421696	0.501048	0.512192	0.473524	0.371056
2023	3	17	14	15	57	1.00087	1.07962	1.06657	1.102	0.97899	1.1493	1.21214	1.18773	1.12832	1.06974	1.17879	1.22853	1.32822	1.20535	1.22223	1.36976	1.21627	1.16776	1.02155	0.893753	0.956878	1.18928	1.18152	1.12623	1.09287	1.06566	1.08495	1.05835	1.15858
2023	3	31	13	35	44	0.548466	0.62076	0.599917	0.573727	0.540155	0.593495	0.543734	0.556642	0.535343	0.776926	0.64956	0.635856	0.573727	0.511829	0.608356	0.625841	0.713172	0.695764	0.677766	0.630873	0.640792	0.655324	0.67868	0.664792	0.630873	0.616659	0.654368	0.635856	0.628866
2023	4	3	14	12	15	0.37577	0.388554	0.427897	0.644438	0.738239	0.773385	0.753799	0.972312	1.05503	1.06153	1.23807	1.25377	1.3634	1.22058	1.16023	1.1136	1.15496	1.05875	1.06796	1.05968	1.03133	1.22171	1.24358	1.08066	0.795867	1.039	0.97284	0.98899	0.887586
2023	4	4	13	36	22	0.892429	0.912969	0.948517	0.962068	0.900214	0.978183	1.05784	1.16282	1.06236	1.13429	1.12791	1.10843	1.15446	1.20378	1.22435	1.25119	1.17756	1.21042	1.16718	1.13837	1.08649	1.14467	1.29778	1.25748	1.37259	1.31973	1.30788	1.32963	1.25552
2023	4	6	13	35	8	No Data	No Data	No Data	No Data	No Data	No Data	No Data	No Data	No Data	No Data	No Data	0.7415	0.737206	0.7483	1.0375	0.884112	0.927681	0.819521	0.751668	0.744911	0.67994	0.608014	0.558246	0.694144	0.686616	0.601356	0.69972	0.662373	No Data
2023	4	12	14	11	47	0.683859	0.746461	0.791813	0.761231	0.777107	0.731279	0.718984	0.771865	0.749604	0.728028	0.620874	0.670404	0.785977	0.833079	0.751169	0.694382	0.667671	0.72064	0.746461	0.783036	0.682085	0.751949	0.706401	0.74882	0.697844	0.708096	0.660312	0.732089	0.718154
2023	4	15	14	3	5	0.979817	0.854464	1.03231	1.05313	0.945046	0.857017	0.836931	0.930015	0.993721	1.06147	1.04327	0.919787	0.886207	0.89463	0.912291	0.888626	1.04422	0.906461	0.844789	0.66794	0.767577	0.645929	0.750146	0.793799	0.66794	0.597856	0.683862	0.798052	0.785196
2023	4	18	13	37	14	0.708288	0.715474	0.633616	0.819175	0.77698	0.844476	0.810236	0.88543	0.952152	0.953923	0.955688	1.00812	1.10959	1.11611	1.02152	0.939618	0.911869	0.880797	0.86939	0.865993	0.908072	0.909974	0.995542	0.888718	0.925593	0.920638	0.936596	0.911238	0.949784
2023	4	21	14	6	11	0.776566	0.753761	0.609767	0.61663	0.610753	0.729176	0.653275	0.713221	0.668473	0.735427	0.591685	0.749992	0.678942	0.759737	0.683243	0.759737	0.787271	0.879081	0.861357	1.06856	0.91585	0.667591	0.537778	0.647803	0.504842	0.589636	0.600806	0.585512	0.376169
2023	4	23	13	43	16	0.803886	0.85705	0.688237	0.812804	0.859501	0.618119	0.774349	0.825923	0.855409	0.736069	0.74113	0.753087	0.748137	0.842957	0.749131	0.863565	0.776242	0.762854	0.673576	0.753087	0.78561	0.820712	0.725803	0.496393	0.723726	0.742137	0.723726	0.781882	0.679264
2023	4	30	13	41	13	0.694346	0.630717	0.613513	0.656502	0.66844	0.60912	0.583101	0.69153	0.71994	0.606909	0.675279	0.79719	1.24943	0.989058	0.811728	1.15858	1.28684	1.18641	1.19195	1.05483	0.905617	0.869852	0.871897	0.841882	0.75115	0.766108	0.79252	0.75951	0.781468
2023	5	1	13	36	17	0.598114	0.585077	0.600254	0.644243	0.779393	0.781674	0.813379	0.946725	0.975799	1.15194	1.04373	0.940398	0.902849	0.926364	1.04521	1.15236	1.12204	1.00465	0.928136	0.83587	0.858838	0.892305	0.994647	0.812662	0.774034	0.713925	0.793682	0.831025	0.774034
2023	5	14	13	36	7	0.672741	0.562037	0.46588	0.37797	0.527123	0.555753	0.660521	0.565771	0.603965	0.686647	0.600504	0.495315	0.447329	0.406237	0.347924	0.232037	0.298952	0.328132	0.436171	0.499582	0.500996	0.513544	0.42804	0.480819	0.541644	0.467395	0.399325	0.560787	0.582836
2023	5	19	14	13	59	0.614122	0.839935	1.00422	0.859603	0.7146	0.877418	0.935053	1.05178	0.939982	1.06452	1.06407	1.04763	1.00422	1.00175	0.914365	0.863333	0.838643	0.84058	0.899976	0.952401	1.10653	1.08408	1.11414	1.12042	1.03269	1.01352	0.953469	0.996784	0.967195
2023	5	26	14	6	38	1.02141	1.00608	1.06843	0.988457	1.05544	1.00889	1.01216	1.07991	1.08244	1.0269	1.04221	1.03774	1.0727	1.02735	1.02553	1.05369	1.08913	1.06456	1.09121	1.09329	1.08579	1.12172	1.09659	1.08412	1.12451	1.13594	1.16058	1.14178	1.18668
2023	5	28	13	38	0	0.875845	0.857179	0.826896	0.913417	0.864162	0.957779	0.740624	0.835712	0.828375	0.832055	0.963108	0.806546	0.945772	0.889299	0.934146	1.00089	1.04028	1.11432	1.23411	1.24221	1.14076	1.07453	1.06952	1.11573	1.1072	1.16589	1.19751	1.15118	1.1072
2023	6	19	14	16	56	0.720664	0.737171	0.775615	0.586826	0.570307	0.737984	0.775615	0.800799	0.82351	0.800074	0.837936	0.85465	0.654713	0.607007	0.633393	0.682449	0.650901	0.718985	0.665984	0.648985	0.757123	0.660379	0.766447	0.842665	0.697541	0.614245	0.556691	0.673366	0.856623
2023	6	26	13	43	42	0.972542	0.948407	1.06463	0.980777	0.862684	0.799803	0.698393	0.76468	0.786992	0.84687	0.90178	1.15287	1.20081	1.15515	1.25757	1.39339	1.60364	1.62346	1.58952	1.51559	1.611	1.58276	1.30877	1.2756	1.25271	1.20254	1.20982	1.32099	1.21068
2023	6	29	13	42	39	1.30973	1.29797	1.29294	1.26999	1.38738	1.31995	1.38573	1.55697	1.65627	1.73989	1.74578	1.79187	1.83911	1.85241	1.90487	1.8725	1.97471	2.03728	2.01596	2.10163	2.09296	2.09873	2.06704	2.05449	1.92205	1.47688	1.43328	1.36297	1.393
2023	7	5	13	43	53	No Data	No Data	No Data	No Data	No Data	0.833346	0.834113	0.838693	0.895842	0.987225	0.947984	0.973401	1.31657	1.54726	1.48437	1.57478	1.55092	1.33783	1.26489	1.22451	1.26736	1.21238	1.13462	1.09208	1.15642	1.24029	1.22752	1.11956	1.09816
2023	7	6	13	45	12	0.743824	0.838005	0.754836	0.781034	0.736935	0.77863	0.873054	1.16412	1.33719	1.37625	1.55572	1.63332	1.59128	1.7167	1.84197	1.82365	1.66364	1.63394	1.29708	0.868958	0.768909	0.798352	0.753997	0.788973	0.746385	0.847323	0.80605	0.753997	0.855794
2023	7	16	13	42	59	No Data	No Data	No Data	No Data	No Data	No Data	No Data	No Data	No Data	0.872171	0.908577	0.960684	0.948229	1.03421	0.99048	0.989861	0.999095	1.01061	1.02604	1.03941	1.0278	1.02955	1.03883	1.07089	1.0417	1.06315	0.980492	0.921852	1.05251
2023	7	17	13	45	19	0.653903	0.437685	0.591997	0.62388	0.734869	0.65286	0.717603	0.757639	0.862872	0.81773	0.897431	0.740209	0.712965	0.790923	0.69689	0.803697	0.852819	0.87485	1.08988	1.19858	1.23179	1.18457	1.14335	1.15626	1.13447	1.18678	1.17032	1.19728	1.25855
2023	7	21	14	17	39	1.15868	1.14522	1.13197	1.11939	1.07069	1.08981	1.03439	1.07069	1.06826	1.03183	1.02097	1.03897	1.07263	0.981789	1.09358	1.17403	1.26672	1.12974	1.15954	1.18075	1.16169	1.08318	1.07069	0.983447	0.998717	0.940056	0.981236	0.93828	1.00141
2023	7	22	14	17	3	0.615152	0.58821	0.523073	0.5928	0.62811	0.69599	0.653088	0.577727	0.662153	0.746866	0.753638	0.636571	0.621672	0.70894	0.781519	0.930605	1.08692	1.20125	1.17777	1.1983	1.24714	1.32865	1.37582	1.3071	0.856287	0.661154	0.669097	0.741731	0.677892
2023	7	23	13	43	10	0.944949	0.982422	0.928882	0.805854	1.01598	0.869421	0.959264	0.944259	0.940797	0.961954	0.983072	0.965967	1.00915	1.05319	1.1311	1.1877	1.3019	1.32023	1.38589	1.38429	1.5332	1.59517	1.60159	1.60692	1.48676	1.22632	1.03903	1.02395	1.01906
2023	7	26	14	21	43	1.40373	1.43144	1.40884	1.36387	1.37334	1.37404	1.46322	1.46552	1.54719	1.62139	1.66702	1.66458	1.67741	1.74916	1.84791	1.952	2.14487	2.23255	2.32921	2.47476	2.38188	2.36439	1.72776	1.55629	1.52952	1.53395	1.5475	1.51937	1.58899
2023	7	28	14	18	25	0.974814	1.06798	1.12753	1.05317	1.11914	1.08838	1.13818	1.14286	1.16133	1.25103	1.56364	1.69962	1.80237	1.9285	1.92334	1.87288	1.91649	1.98397	1.80481	1.79371	1.65905	1.6537	1.47753	1.42771	1.44806	1.42243	1.40618	1.28829	1.09629
2023	7	31	13	22	21	0.388221	0.409698	0.438574	0.354084	0.375234	0.525927	0.706433	0.815255	0.866303	0.896165	0.936403	1.0179	1.12713	1.11727	1.20981	1.3499	1.50009	1.57782	1.63627	1.66526	1.67776	1.70142	1.73695	1.7756	1.77428	1.83104	1.72181	1.72312	1.69846
2023	8	2	13	42	22	1.07496	1.13643	1.15316	1.18152	1.24317	1.25605	1.22933	1.278	1.26542	1.28167	1.20457	1.21369	1.23743	1.19575	1.21723	1.18684	1.15613	1.08758	1.03568	0.980024	0.959613	0.9483	0.890908	0.861337	0.865934	0.820364	0.8161	0.800188	0.828097
2023	8	15	13	45	22	1.02993	1.11851	1.08517	1.03228	1.05415	1.06035	1.09378	1.13032	1.05245	1.08354	1.09699	1.11071	1.15389	1.15881	1.18392	1.20365	1.16856	1.30984	1.37405	1.43536	1.42789	1.43573	1.37639	1.40943	1.33275	1.28769	1.32666	1.31273	1.28047
2023	8	21	13	45	30	1.12258	0.857928	0.883633	0.838051	0.61181	0.836654	0.755599	0.702136	0.415638	0.55341	0.686746	0.648655	0.690408	0.577811	0.484571	0.675606	0.697656	0.907649	1.30223	1.43954	1.52073	1.64224	1.73772	1.77906	1.79714	1.80198	1.87922	2.09485	2.03383
2023	8	24	14	19	51	0.551898	0.582371	0.500467	0.662313	0.567929	0.664184	0.684345	0.586734	0.649019	0.719141	0.73327	0.77205	0.726667	0.837581	0.698538	0.684345	0.725004	0.878276	0.892063	0.918125	0.966589	1.15281	1.39847	1.54518	1.5953	1.65058	1.68227	1.66222	1.6176
2023	8	26	14	23	42	0.933089	0.901299	0.827037	0.931484	0.851428	0.840923	0.790079	0.737143	0.481691	0.449782	0.548617	0.490266	0.542097	0.737894	0.790079	0.755604	0.846508	1.01464	0.721908	0.680978	0.783216	1.04091	1.42136	1.52468	1.42963	1.5244	1.63561	1.62209	1.56319
2023	9	3	14	22	12	0.959562	0.957404	1.03136	0.900249	0.893687	0.944847	No Data	No Data	No Data	No Data	No Data	No Data	No Data	No Data	No Data	No Data	No Data	No Data	No Data	1.82601	1.65517	1.46448	1.49479	1.54448	1.65828	1.48075	1.43361	1.35184	1.18762
2023	9	6	13	46	0	0.902191	0.935425	0.931294	1.03183	1.00126	0.979147	1.07501	1.19759	1.31812	1.23683	1.22826	1.29323	1.4013	1.49875	1.38794	1.30159	1.37342	1.4519	1.49092	1.54083	1.62787	1.73739	1.72548	1.63474	1.56098	1.58704	1.62248	1.50748	1.40694
2023	9	10	13	42	30	0.657136	0.67513	0.683443	0.60551	0.688005	0.705872	0.67233	0.719747	0.729922	0.702347	0.702347	0.695224	0.697906	0.679765	0.699687	0.714586	0.713721	0.768035	0.775041	0.854263	0.881205	0.912486	0.94397	0.969504	1.05144	1.06843	1.15512	1.11259	1.08595
2023	9	12	13	45	35	0.565346	0.621447	0.573583	0.660327	0.662294	0.696512	0.685351	0.676823	0.815812	0.832585	0.73469	0.820969	0.764701	0.830425	0.855825	0.823895	0.831866	0.840436	0.86473	0.882803	1.04281	1.0474	1.0474	1.00165	1.0595	1.00653	1.04281	1.00382	1.09885
2023	9	13	13	43	59	0.642111	0.640174	0.691867	0.792619	0.794078	0.728392	0.789689	0.81482	0.802754	0.802036	0.792619	0.697986	0.832792	0.745368	0.718447	0.751698	0.744572	0.814118	0.809883	0.88045	0.916342	0.84224	0.833472	0.738964	0.790423	0.852852	0.81271	0.854821	0.830064
2023	9	14	13	43	24	0.579569	0.606707	0.594361	0.64866	0.633445	0.667979	0.646783	0.685738	0.731723	0.734919	0.730118	0.752167	0.71131	0.734122	0.681354	0.670681	0.645841	0.68922	0.642058	0.71131	0.686611	0.818283	0.827798	0.841122	0.841781	0.812081	0.734919	0.717104	0.720387
2023	9	24	14	24	24	1.01322	1.06197	1.03965	1.05408	1.02326	0.978618	1.07491	1.14899	1.08358	1.09114	1.03478	1.09714	1.10849	1.11628	1.16598	1.38427	1.50967	1.6976	1.8252	1.88006	1.98338	2.06976	2.06218	2.09904	2.07777	2.01162	2.15536	2.02287	1.90346
2023	10	4	14	45	55	0.603044	0.508544	0.569152	0.624149	0.691507	0.742701	0.405755	0.487759	0.298158	0.490112	0.673831	0.685946	1.0132	1.26499	1.4172	1.488	1.4992	1.58158	1.59708	1.59892	1.62504	1.66038	1.52922	1.22132	1.15955	1.0338	0.960161	0.969473	0.960161
2023	10	6	14	23	35	1.20268	1.19248	1.1856	1.25625	1.20118	1.2008	1.14671	1.04037	1.04223	1.11547	1.06914	1.09246	1.12919	1.21648	1.41387	1.51691	1.56604	1.63666	1.76508	1.49369	1.45741	1.54017	1.60962	1.71787	1.73589	1.72701	1.60962	1.41264	1.40833
2023	10	7	14	25	57	0.908626	0.924088	0.843073	0.924654	0.881938	0.936405	0.937512	1.11898	1.01205	1.12235	1.10962	0.971953	1.17558	1.19231	1.21884	1.22219	1.29814	1.42909	1.55925	1.69198	1.82711	1.93476	1.84436	1.94142	1.85216	2.05377	1.86346	1.38603	1.12109
2023	10	8	13	45	20	0.548739	0.507707	0.431198	0.418531	0.475962	0.440487	0.527363	0.609003	0.664876	0.698137	0.86308	0.886559	0.976277	0.844302	0.926623	1.25821	1.5355	1.59501	1.58383	1.58943	1.62254	1.52248	1.34598	0.999171	0.847826	0.772034	0.673631	0.582076	0.613355
2023	10	18	13	41	34	0.12118	0.238384	0.193967	0.289599	0.291704	0.236025	0.214235	0.33386	0.326115	0.330003	0.356364	0.347116	0.388244	0.360013	0.328063	0.274597	0.27677	0.05609	0.12118	0.310234	0.099439	0.105757	0.111989	0.073254	0.150553	0.096247	0.293799	0.243068	0.224046
2023	10	23	13	43	44	0.717267	0.667267	0.720856	0.744482	0.774468	0.806749	0.92781	0.979733	0.955798	0.95758	0.980878	0.982592	1.04771	1.13059	1.18446	1.21324	1.23462	1.29056	1.42112	1.53519	1.62376	1.61844	1.73357	1.7426	1.78417	1.81949	1.83858	1.87621	1.85105
2023	10	28	13	42	53	0.79688	0.859432	0.801104	0.755527	0.80446	0.767279	0.740708	0.778784	0.892664	0.860191	0.828211	0.878861	0.872208	1.18696	1.26758	1.26117	1.4194	1.51269	1.72873	1.76051	1.73379	1.67985	1.72569	1.71962	1.7534	1.79178	1.79724	1.76221	1.70816
2023	10	30	13	40	47	1.23379	1.2023	1.21153	1.28061	1.26184	1.28832	1.24511	1.32936	1.38593	1.47824	1.48022	1.37034	1.4299	1.52594	1.56981	1.65216	1.68021	1.71352	1.69422	1.72879	1.79238	1.81516	1.82151	1.89018	1.91159	1.86221	1.89707	1.94268	1.99457
2023	11	1	13	45	54	0.44354	0.339494	0.213533	0.225831	0.043637	0.12295	0.12295	0.182612	0.325964	0.233057	0.260891	0.44354	0.590953	0.655165	0.709614	0.825343	1.07075	1.25154	1.5291	1.56663	1.36215	1.33546	1.43895	1.43152	1.45901	1.52172	1.32667	1.17712	1.16931
2023	11	5	14	25	50	0.579662	0.589161	0.539772	0.530459	0.592289	0.636086	0.594363	0.545505	0.631293	0.796999	1.10373	1.21744	1.386	1.52301	1.62936	1.70156	1.72362	1.7222	1.76333	1.82148	1.77444	1.7409	1.73183	1.69392	1.65347	1.64412	1.658	1.36668	1.02237
2023	11	14	13	48	21	0.551171	0.55857	0.52699	0.54868	0.610866	0.588285	0.620711	0.666317	0.73944	0.681961	0.788254	0.767274	0.789045	0.867222	1.02448	1.10393	1.19503	1.29873	1.32431	1.35908	1.40438	1.43669	1.36339	1.3176	1.05387	0.95018	0.863764	0.69528	0.615265
2023	11	15	13	41	46	0.130507	0.046148	0.315811	0.18493	0.315811	0.158522	0.179191	0.26585	0.187773	0.328565	0.355074	0.380184	0.359024	0.540547	0.751013	0.789427	0.895348	0.840206	0.821394	0.936719	1.0428	1.0631	1.09015	0.9991	0.854675	0.731684	0.6898	0.529587	0.317961
2023	11	19	13	47	4	0.7125	0.60911	0.663358	0.698583	0.787227	0.808762	0.779185	0.773076	0.706745	0.862775	0.841414	0.913006	1.00396	1.05218	1.08007	1.09238	1.02178	1.07695	1.08748	1.06118	1.05283	1.06816	0.943544	1.03251	1.14254	1.16393	1.05218	0.960126	0.924933
2023	11	20	13	44	48	0.834286	0.803083	0.848133	0.846611	0.810438	0.840481	0.892752	0.924986	0.924318	0.975017	1.001	1.04401	1.03111	0.984808	1.0648	1.10515	1.14533	1.12971	1.1649	1.09643	1.184	1.07868	1.08237	1.0897	1.10003	1.04011	1.05721	1.10769	1.12426
2023	11	21	13	46	9	0.265244	0.364468	0.306089	0.451671	0.384393	0.38634	0.441377	0.370533	0.370533	0.35626	0.410964	0.434391	0.374534	0.42372	0.608859	0.742501	0.861407	0.95745	1.13002	1.10271	1.16184	1.10857	1.10485	1.17265	1.16431	1.21175	1.1372	1.10592	0.987254
2023	11	26	14	27	26	0.298475	0.344362	0.355171	0.347992	0.423139	0.288327	0.212785	0.231692	0.381169	0.392834	0.32578	0.460325	0.426221	0.466019	0.600339	0.405827	0.399374	0.466019	0.420037	0.479973	0.461755	0.444312	0.298475	0.277955	0.164524	0.210367	0.222334	0.277955	0.30841
2023	12	1	13	47	56	0.592241	0.600188	0.639391	0.670125	0.676968	0.619531	0.605418	0.594904	0.438782	0.495387	0.490503	0.473864	0.610595	0.650236	0.635725	0.627068	0.809828	1.08399	1.23852	1.34041	1.36275	1.25995	1.36525	1.56265	1.55709	1.44128	1.36692	1.33486	1.40501
2023	12	3	13	45	33	0.174643	0.255943	0.285833	0.237581	0.229485	0.27361	0.318458	0.258508	0.234898	0.2322	0.240249	0.32738	0.387489	0.344734	0.136318	0.242902	0.195611	0.212857	0.27361	0.320705	0.295387	0.192673	0.329584	0.34686	0.20718	0.258508	0.218466	0.333962	0.342599
2023	12	14	14	28	14	0.897116	0.975877	0.943086	0.955366	0.910341	0.941903	0.949548	0.934164	1.01557	1.01977	1.05551	1.13546	1.16562	1.17712	1.11007	1.06833	1.08522	1.06784	1.07271	1.08713	1.10498	1.10869	1.13412	1.07562	1.07174	1.05152	1.03327	1.14344	1.14564
2023	12	17	13	47	54	1.17159	1.1735	1.14636	1.12435	1.24704	1.29641	1.46106	1.64754	1.69931	1.67502	1.63715	1.49842	1.41885	1.56378	1.64077	1.70875	1.72315	1.78139	1.83762	1.86451	1.85986	1.82107	1.71865	1.48701	1.48463	1.33763	1.06222	0.893187	0.88933
2023	12	21	14	29	12	No Data	No Data	No Data	No Data	No Data	No Data	No Data	No Data	No Data	0.402071	0.448207	0.445054	0.391584	0.391584	0.396856	0.407231	0.325344	0.278406	0.304586	0.337375	0.280645	0.366181	0.349107	0.352955	0.315079	0.33539	0.253053	0.389813	0.298177
2023	12	24	14	28	22	0.755352	0.816301	0.703368	0.740276	0.777692	0.765177	0.726861	0.862364	0.923827	0.929715	0.984374	0.943476	0.924566	0.934821	0.972859	0.962522	0.990388	0.955535	0.968744	0.989056	0.991053	0.936996	1.02219	0.989056	0.990388	0.925304	0.890379	0.880923	0.893498
2023	12	26	14	27	38	0.320093	0.330646	0.419849	0.484603	0.476963	0.498062	0.514027	0.470765	0.282334	0.48913	0.461317	0.551167	0.521117	0.577003	0.435189	0.506834	0.398606	0.537732	0.478501	0.566827	0.493616	0.518293	0.456524	0.402212	0.553811	0.615781	0.502467	0.597971	0.435189
2023	12	28	14	28	7	0.078197	0.320751	0.191952	0.244812	0.102639	0.221766	0.249782	0.160082	0.269149	0.329176	0.141722	0.280859	0.303437	0.249782	0.290021	0.301228	0.301228	0.273869	0.331259	0.285462	0.2547	0.329176	0.312174	0.353587	0.266772	0.283167	0.316482	0.283167	0.242307
2023	12	30	13	44	4	0.128507	0.305652	0.267276	0.399012	0.245447	0.303189	0.324908	0.394958	0.38881	0.365568	0.390868	0.441503	0.320167	0.390868	0.483975	0.380488	0.409003	0.450661	0.437791	0.435924	0.445187	0.483975	0.445187	0.303189	0.365568	0.428384	0.378385	0.300713	0.305652
2024	1	2	13	45	45	0.569348	0.500358	0.61797	0.55849	0.574691	0.630033	0.730619	0.7365	0.676755	0.639485	0.683256	0.655622	0.706432	0.661266	0.663507	0.663507	0.641821	0.666851	0.634781	0.641821	0.641821	0.634781	0.663507	0.62283	0.589099	0.521485	0.626444	0.577341	0.583907
2024	1	5	14	29	36	0.292112	0.191235	0.376924	0.229818	0.174854	0.369643	0.371474	0.418432	0.354739	0.362249	0.335428	0.455118	0.360383	0.20964	0.306997	0.341304	0.339353	0.376924	0.258533	0.337394	0.20964	0.201841	0.389406	0.224855	0.337394	0.411758	0.260848	0.227343	0.249156
2024	1	10	13	47	54	0.422424	0.459775	0.597032	0.5846	0.534661	0.546866	0.418526	0.607834	0.546866	0.551367	0.63768	0.641449	0.614471	0.597032	0.632612	0.633884	0.61972	0.543842	0.642699	0.504416	0.536203	0.477428	0.557306	0.540801	0.463357	0.416565	0.489418	0.424362	0.418526
2024	1	14	14	32	4	0.318636	0.247418	0.336325	0.276777	0.208548	0.287596	0.116295	0.149143	-0.011508	0.281134	0.336325	0.334392	0.200883	0.366232	0.225955	0.324606	0.302336	0.353378	0.326579	0.384014	0.328545	0.385756	0.258929	0.324606	0.254359	0.208548	0.326579	0.28973	0.406185
2024	1	15	13	48	23	0.120097	-0.06863	0.022615	-0.249872	0.043854	-0.063338	0.052078	0.116572	0.11302	0.013833	0.098531	0.018246	0.105833	0.239978	0.312584	0.350463	0.537986	0.677252	0.652248	0.564924	0.278932	0.387533	0.339633	0.489042	0.472695	0.501739	0.432885	0.467683	0.480936
2024	1	29	13	45	49	0.52478	0.507001	0.464039	0.4782	0.400832	0.48513	0.52478	0.502039	0.508644	0.527945	0.493657	0.471171	0.583157	0.672434	0.605282	0.780734	0.953326	1.10182	1.27446	1.29684	1.24913	1.31512	1.35864	1.26069	1.25925	1.22408	1.17644	1.14745	1.10182
2024	1	30	13	46	14	0.201909	0.282363	0.248002	0.160758	0.344359	0.258846	0.266817	0.213868	0.418709	0.337607	0.326135	0.407091	0.299872	0.479755	0.499602	0.578854	0.732125	0.810765	0.909944	0.896207	0.836125	0.850485	0.976394	1.09186	1.11548	1.09528	0.986483	0.944413	0.80987
2024	1	31	13	53	14	0.901113	0.924097	0.925423	0.905233	0.901802	0.905233	0.915412	0.924097	0.903863	0.926084	0.911361	0.940462	0.922769	0.946249	0.927405	0.939169	0.949442	0.928723	0.968261	0.970728	0.960175	0.961425	0.969495	0.912714	0.910004	0.987739	0.987739	0.985336	0.983528
2024	2	4	13	46	1	0.422196	0.298017	0.343109	0.415719	0.358051	0.424336	0.609038	0.411353	0.575596	0.652737	0.558008	0.709076	0.610507	0.651383	0.681659	0.77529	0.730505	0.739761	0.667398	0.569271	0.667398	0.59713	0.613433	0.656776	0.70542	0.675225	0.656776	0.513804	0.595622
2024	2	11	14	28	29	0.738186	0.614376	0.612188	0.723315	0.619805	0.593202	0.701593	0.615466	0.847451	0.78449	0.786074	0.766762	0.799358	0.872452	0.626246	0.588631	0.582857	0.646126	0.658301	0.605567	0.592063	0.619805	0.704357	0.730364	0.750134	0.813089	0.807789	0.850282	0.819086
2024	2	12	14	36	0	No Data	0.890747	0.90394	0.869765	0.886488	0.893771	0.868508	0.899773	0.940203	0.938524	1.05879	1.01944	1.10614	1.10919	1.10614	1.03748	1.02828	1.0494	1.00899	1.0639	0.995294	0.99683	1.00999	0.995807	1.04371	1.04798	1.01548	No Data	No Data
2024	2	17	13	47	31	0.573803	0.585752	0.634163	0.679416	0.704434	0.689178	0.650035	0.70818	0.748624	0.695906	0.818496	0.793508	0.832082	0.754653	0.741651	0.777306	0.683342	0.722001	0.774008	0.732808	0.800649	0.738131	0.648992	0.717433	0.756363	0.709113	0.711901	0.714674	0.599729
2024	2	22	14	36	6	0.682141	0.68805	0.738473	0.71585	0.76385	0.797798	0.781083	0.814694	0.845162	0.764579	0.753543	0.785309	0.854555	0.778248	0.758721	0.814694	0.706203	0.841996	0.822629	0.828508	0.80326	0.709438	0.771096	0.848938	0.736176	0.805971	0.753543	0.807996	0.779667
2024	2	27	13	47	4	0.703831	0.707469	0.694625	0.656112	0.695553	0.666987	0.707469	0.65411	0.693696	0.701086	0.725298	0.746787	0.731402	0.760108	0.72178	0.752655	0.704743	0.708375	0.640907	0.788171	0.725298	0.74847	0.713777	0.76257	0.778709	0.765836	0.796706	0.755151	0.77231
2024	3	8	13	52	3	No Data	No Data	No Data	No Data	No Data	No Data	No Data	No Data	No Data	No Data	No Data	No Data	No Data	0.842073	0.885868	0.854347	0.863716	0.842762	0.821018	0.822446	0.81092	0.786375	0.720208	0.740418	0.774075	0.709811	0.720208	0.7001	0.725332
2024	3	13	14	42	51	0.924916	0.916211	0.912071	0.886075	0.943939	1.07192	1.05256	1.03608	1.00589	0.953723	0.991412	0.934	0.91827	0.942953	0.928464	0.948361	0.949828	0.832166	0.843937	0.832166	0.911031	0.902651	0.892546	0.810963	0.839844	0.837493	0.783776	0.850311	0.761974
2024	3	20	13	49	16	0.360768	0.41076	0.397001	0.571172	0.565016	0.635454	0.302779	0.560036	0.653476	0.652433	0.669885	0.548648	0.591558	0.548648	0.684816	0.583263	0.696463	0.63868	0.606612	0.535683	0.578461	0.673909	0.632208	0.69454	0.765711	0.691641	0.816499	0.835445	0.773257
2024	3	21	13	48	14	0.229811	0.373723	0.322507	0.491247	0.310333	0.428073	0.328478	0.514671	0.349751	0.431275	0.499642	0.428073	0.454637	0.387898	0.347856	0.246592	0.503786	0.511972	0.494061	0.507896	0.573023	0.613297	0.571824	0.589517	0.584859	0.712692	0.628558	0.686435	0.669834
2024	3	25	13	52	27	No Data	No Data	No Data	No Data	No Data	No Data	No Data	0.69649	0.66764	0.606756	0.53283	0.556398	0.683162	0.661112	0.596226	0.586558	0.540018	0.584385	0.540018	0.562121	0.543573	0.705192	0.804325	0.840592	0.799987	No Data	No Data	No Data	No Data
2024	3	27	13	50	51	0.639988	0.63901	0.651591	0.622081	0.635076	0.68133	0.593993	0.68133	0.658243	0.656351	0.623092	0.631112	0.675881	0.659186	0.6676	0.650634	0.635076	0.63901	0.698225	0.656351	0.685828	0.676793	0.625109	0.643885	0.639988	0.685828	0.665742	0.611856	0.701714
2024	3	28	14	42	33	0.449709	0.709594	0.783544	0.74924	0.708068	0.734893	0.669242	0.63964	0.659281	0.710355	0.603599	0.613765	0.734893	0.686232	0.717159	0.692563	0.731978	0.857035	0.715655	0.772797	0.744976	0.6957	0.745689	0.734166	0.721648	0.602665	0.721648	0.726838	0.561789
2024	4	1	13	52	14	0.815733	0.858622	0.835029	0.850864	0.783097	0.922315	0.874516	0.882641	0.84873	0.87927	0.89132	0.915988	0.843001	0.909593	0.981125	0.974212	1.03446	0.954207	1.00971	1.02542	1.11896	1.08586	No Data	No Data	No Data	No Data	No Data	No Data	No Data
2024	4	6	13	52	32	0.869901	0.829715	0.75377	0.64877	0.703853	0.747153	0.927292	0.895448	0.760308	0.854984	0.910017	0.957562	0.881173	0.826838	0.911268	0.86856	0.850157	0.887054	0.854984	0.958141	0.912515	0.879858	0.877219	0.979202	0.927292	0.852231	0.916862	0.873239	0.937547
2024	4	7	14	41	12	No Data	No Data	No Data	No Data	0.95462	0.923118	0.87316	0.880724	0.881879	0.975267	0.897256	0.984125	0.859536	0.770192	0.919877	0.848646	0.867867	0.767378	0.843124	0.862525	0.902852	0.88762	0.763129	0.903965	0.923656	0.919877	0.849256	0.912247	No Data
2024	4	9	14	39	29	0.915374	0.916982	0.919653	0.907814	0.906726	0.773394	0.849634	0.86385	0.95234	0.95335	0.92917	0.948792	1.04973	0.949808	0.983886	0.849033	0.859739	0.945735	0.970277	0.867931	0.883415	0.945224	0.956371	0.954359	0.91912	0.911606	1.01853	0.987722	0.991535
2024	4	12	13	51	17	No Data	No Data	No Data	No Data	No Data	No Data	No Data	No Data	No Data	No Data	0.729144	0.835361	0.860447	0.94179	0.964432	0.930427	0.992263	1.00501	1.03214	1.08508	1.08335	1.13601	1.26702	1.15672	1.14044	1.12912	1.00695	1.15632	1.0414
2024	4	15	13	52	14	0.884519	0.677678	0.699655	0.774093	0.858163	0.810407	0.805256	0.901668	0.836884	0.860181	0.851384	0.746025	0.84865	0.759838	0.736898	0.70855	0.725053	0.679545	0.517809	0.603438	0.852066	0.622502	0.908516	0.850702	0.803034	0.735221	0.684183	0.79931	0.787226
2024	4	21	13	52	44	1.15996	1.19138	1.17105	1.13731	1.11189	1.1867	1.15705	1.13631	1.11447	1.08824	1.12521	1.14328	1.14477	1.1834	1.2103	1.25827	1.27499	1.29932	1.33637	1.33957	1.29808	1.27668	1.26816	1.45014	1.40514	1.36482	1.36794	1.52188	1.42652
2024	4	22	13	51	12	0.83233	0.838472	0.805641	0.819143	0.822643	0.849897	0.860448	0.950619	0.972182	0.951182	1.01171	1.09622	1.1909	1.2095	1.22769	1.26411	1.29668	1.39888	1.45343	1.61204	1.6856	1.74792	1.77237	1.68415	1.56377	1.29383	1.13671	1.06336	0.966174
2024	4	24	13	50	30	1.02285	1.01459	1.01736	1.0321	1.09894	0.999456	1.04228	1.05649	1.13951	1.28954	1.39151	1.40392	1.44118	1.47789	1.52798	1.58437	1.55341	1.59335	1.60166	1.47419	1.4092	1.46439	1.53126	1.50558	1.63824	1.66799	1.67999	1.61474	1.53649
2024	4	25	13	50	40	1.06794	1.07936	1.11615	1.11928	1.14648	1.15803	1.18187	1.23227	1.18517	1.34052	1.27069	1.30043	1.41249	1.45778	1.55346	1.59572	1.63365	1.73174	1.67252	1.74421	1.74896	1.72285	1.66245	1.46478	1.14949	1.04801	1.0485	1.02696	1.04553
2024	4	26	13	52	8	0.663502	0.811218	0.756347	0.769563	0.674332	0.631713	0.670419	0.80818	0.876295	0.702783	0.740225	0.767109	0.74622	0.798968	0.856341	0.876971	1.22466	1.64118	1.75089	1.99985	1.80915	1.707	1.58415	1.80194	1.94432	2.08786	2.23788	1.99916	1.64769
2024	4	28	13	53	23	0.794249	0.799818	0.754374	0.722638	0.707274	0.677758	0.74144	0.776479	0.955106	1.04172	1.09644	1.05052	1.00774	0.972445	1.00331	1.03844	1.01652	1.08073	1.18708	1.22279	1.1747	1.02135	0.712174	0.67689	0.59523	0.633437	0.617131	0.581833	0.572346
2024	4	29	14	42	50	1.02069	1.11473	1.2183	1.32417	1.20984	1.2468	1.28827	1.24745	1.28263	1.27602	1.31082	1.25943	1.31387	1.31204	1.35335	1.48687	1.54777	1.52108	1.4858	1.45255	1.4882	1.36475	1.3554	1.2183	1.13775	1.12953	1.15248	1.10392	1.05651
2024	5	9	13	52	35	1.03577	0.863575	1.0008	1.08138	1.04669	0.975448	0.960326	0.991902	0.97199	0.982308	0.974873	1.06198	0.917685	0.965018	1.01067	1.0074	1.11023	1.02361	1.00301	1.23655	1.29011	1.31785	1.21824	1.19448	1.09258	1.05743	1.11023	0.996367	0.963262
2024	5	18	13	50	8	0.907522	1.11878	1.19636	1.23255	1.43941	1.43978	1.4325	1.51808	1.61009	No Data	No Data	No Data	No Data	No Data	No Data	No Data	1.87233	1.79733	1.822	1.84687	1.88343	No Data	No Data	No Data	No Data	No Data	No Data	No Data	No Data
2024	5	30	13	55	24	1.26788	1.16809	1.23919	1.22916	1.20667	1.23077	1.34995	1.54609	1.52582	1.64027	1.65778	1.73101	1.78798	1.87302	2.1339	2.00728	1.72764	1.79697	1.77376	1.77283	1.49989	1.46641	1.37891	1.4113	1.26244	1.16243	1.24833	1.27135	1.18951
2024	6	12	13	52	11	0.825401	0.896757	0.945896	1.01569	0.894834	0.774723	0.765137	0.716272	0.656601	0.788796	0.803274	0.847396	0.749609	0.669282	0.669282	0.743775	0.697425	0.717153	0.690991	0.758653	0.908165	0.967363	0.92975	0.834728	0.848092	0.806275	0.730199	0.784922	0.747117
2024	6	15	13	53	38	No Data	1.09313	1.07267	1.03131	1.00144	1.01825	1.04177	1.07986	1.08253	1.09005	1.14478	1.10574	1.10098	1.12782	1.15737	1.17095	1.18196	1.21903	1.19437	1.21678	1.26245	1.21114	1.32997	1.2179	1.22276	1.26885	1.24881	1.16379	1.10832
2024	6	16	14	7	51	0.415014	0.398355	0.440526	0.477885	0.486442	0.446699	0.418277	0.370438	0.446699	0.561103	0.802811	0.861283	1.02374	0.93072	0.858496	0.845789	0.797396	0.714508	0.670197	0.552514	0.582538	0.532312	0.548788	0.569547	0.396657	0.437409	0.492065	0.388076	0.545034
2024	6	19	14	1	12	0.537581	0.444737	0.431602	0.476775	0.486123	0.493996	0.396319	0.277628	0.258856	0.380132	0.399492	0.411978	0.433079	0.501746	0.453299	0.474071	0.552844	0.738966	0.74219	0.773416	0.770372	0.792803	0.785427	0.861713	0.932622	1.10393	1.06358	1.02825	0.861063
2024	6	28	14	49	36	0.660047	0.658346	0.664274	0.703214	0.829036	0.678396	0.69215	0.716346	0.828413	0.925182	0.962609	0.91398	0.976392	0.915056	0.612986	0.836454	0.786404	0.805535	0.789749	0.69454	0.638381	0.616691	0.499887	0.621286	0.781686	0.828413	0.824036	0.923064	0.855185
2024	7	2	14	52	0	1.29233	1.21789	1.22773	1.30523	1.32886	1.39878	1.38047	1.47875	1.53911	1.68984	1.65187	1.65613	1.70343	1.68362	1.65982	1.69465	1.62142	1.52765	1.56882	1.61627	1.64562	1.6584	1.71843	No Data	No Data	1.77661	1.68078	1.6856	1.67115
2024	7	14	14	55	14	1.53359	1.55175	1.47192	1.44606	1.40375	1.48243	1.37905	1.5347	1.57468	1.44491	1.50216	1.57523	1.55038	1.4504	1.47049	1.43939	1.4742	1.47249	1.48413	1.52141	1.47192	1.54736	1.50076	1.49289	1.36805	1.45358	1.40434	1.45473	1.41148
2024	7	18	14	44	45	1.29965	1.45679	1.3762	1.40005	1.4229	1.35156	1.41211	1.38907	1.40123	1.42522	1.48608	1.42928	1.34787	1.3777	1.3765	1.4471	1.46331	1.67005	2.11151	2.23098	2.35644	2.29326	2.30396	2.33402	2.24694	2.19276	2.09105	2.09524	2.14627
2024	7	31	14	44	3	0.521049	0.597117	0.486009	0.705393	0.848515	0.777886	0.820492	0.856277	0.862031	0.685633	0.654994	0.631258	0.647516	0.644684	0.636093	0.683879	0.812225	0.753752	0.606378	0.587684	0.617474	0.702857	0.62244	0.590848	0.628336	0.615475	0.589796	0.707078	0.654994
2024	8	16	13	56	16	0.561946	0.506946	0.663408	0.670951	0.581248	0.62294	0.445053	0.761148	0.691152	0.692052	0.715797	0.761939	0.638114	0.79565	0.752376	0.732731	0.815371	0.741003	0.788919	0.779816	0.803768	0.761939	0.682065	0.714074	0.723483	0.761939	0.702736	0.745092	0.761939
2024	8	17	13	55	44	0.285597	0.308637	0.31237	0.332389	0.408023	0.478658	0.368409	0.281644	0.43752	0.33594	0.344702	0.4274	0.447435	0.468023	0.52025	0.477341	0.473369	0.550727	0.595318	0.494191	0.406499	0.412564	0.438949	0.381445	0.418553	0.397256	0.412564	0.422996	0.451623
2024	8	20	14	45	21	No Data	No Data	1.17728	1.18129	1.16848	1.10793	1.14756	1.12098	1.11429	1.1536	1.16145	1.26816	1.19959	1.22027	1.21297	1.19496	1.17436	1.1536	1.18346	1.14034	1.22477	1.20595	1.16701	1.10713	1.12255	1.16701	1.11902	1.11863	1.14718
2024	8	28	13	57	30	No Data	No Data	No Data	No Data	No Data	No Data	No Data	No Data	No Data	No Data	No Data	No Data	No Data	No Data	No Data	No Data	No Data	1.61306	1.48652	1.60312	1.67203	1.53395	1.5194	1.52405	1.30295	0.812347	0.923994	0.786249	0.626727
2024	9	22	14	44	34	0.722728	0.686396	0.818468	0.882614	0.882614	0.841254	0.900346	0.789461	0.721231	0.833351	0.938948	0.990579	0.866072	0.738924	0.975767	0.916507	0.911168	0.891546	0.855565	0.780793	0.706029	0.501762	0.3199	0.444534	0.438032	0.511999	0.270473	0.229649	0.506338
2024	9	28	14	49	19	0.812824	0.824025	0.833649	0.852425	0.881382	0.902961	0.840425	0.797048	0.828858	0.881382	0.7912	0.843784	0.86418	0.782311	0.797048	0.841098	0.897486	0.787513	0.728204	0.891961	No Data	No Data	No Data	No Data	No Data	No Data	No Data	No Data	No Data
2024	10	1	14	45	49	1.23371	1.23743	1.18382	1.24013	1.26011	1.29282	1.22451	1.25945	1.31425	1.29568	1.37554	1.28867	1.41799	1.296	1.25516	1.29346	1.22588	1.2371	1.26733	1.24784	1.26733	1.27579	1.2371	1.30012	1.30075	1.27157	1.21313	1.2371	1.20406
2024	10	5	14	47	1	0.918252	0.923057	0.915027	0.900851	0.971627	0.9496	0.986219	1.05598	1.04242	1.07689	1.12921	1.19201	1.14548	0.889714	0.860921	0.74768	0.830634	0.8852	0.925711	0.859148	0.938809	0.87145	0.849598	0.92146	1.0968	1.08401	1.07899	1.02542	1.15121
2024	10	6	14	44	59	0.762892	0.820743	0.76375	0.62114	0.613221	0.757714	0.695284	0.771414	0.610935	0.840523	0.853828	0.9311	0.900843	0.615496	0.717223	0.684463	0.713472	0.697229	0.755107	0.754235	0.746324	0.630043	0.754235	0.626723	0.688424	0.655868	0.730148	0.757714	0.812948
2024	10	8	13	59	43	0.774819	0.833405	0.787327	0.769585	0.683479	0.887775	0.907603	0.661892	0.674592	0.798848	0.732285	0.732285	1.02228	1.12907	1.2876	1.06898	0.99868	1.36017	1.19066	1.23839	1.54381	1.61099	1.1748	0.471624	0.367516	0.318593	0.272207	0.393371	0.236333
2024	10	11	14	46	45	0.914019	0.865822	1.04225	0.998428	1.01226	1.00275	0.870584	0.885225	0.975867	0.957639	0.947802	0.981829	0.980839	0.991157	1.02765	0.962755	1.00752	1.03454	1.05433	1.23151	1.19439	1.21871	1.25622	1.10109	1.10606	1.20209	1.11589	1.27357	1.08216
2024	10	17	13	59	50	0.498711	0.524743	0.461716	0.510035	0.79044	0.709099	0.536675	0.47123	0.641696	0.568647	0.659606	0.591362	0.70145	0.631037	0.687574	0.72161	0.890229	0.945692	1.01039	0.841827	0.696289	0.767432	0.866528	0.904129	0.743421	0.715808	0.70145	0.751282	0.728978
2024	10	30	14	48	44	0.446588	0.435702	0.420323	0.45327	No Data	No Data	No Data	No Data	0.689861	No Data	No Data	No Data	0.586265	0.336742	0.241453	0.462474	0.425972	0.307073	0.442534	0.364664	0.377258	0.410276	0.501273	0.350086	0.307073	0.408823	0.395548	0.364664	0.372574
2024	11	13	14	48	26	0.845196	0.805371	0.767103	0.822879	0.819421	0.808209	0.793147	0.917497	1.27784	1.44068	1.38705	1.33787	1.25675	1.24454	1.21885	1.2438	1.22458	1.21961	1.21114	1.19789	1.21462	1.16625	1.09215	1.14682	1.25048	1.12646	No Data	No Data	No Data
2024	11	15	14	46	44	0.44181	0.304163	0.319304	0.335776	0.261932	0.481931	0.415133	0.473896	0.344686	0.358603	0.313683	0.398074	0.572705	0.51282	0.521478	0.644833	0.59331	0.701286	0.615155	0.709852	0.948371	1.11	1.11352	1.07523	1.01634	0.983253	0.989587	0.881531	0.780643
2024	11	16	14	51	44	0.571248	0.594834	0.601801	0.595835	0.609648	0.605739	0.741431	0.719779	0.769504	0.732257	0.870142	0.900144	0.980184	0.929814	0.937417	0.978163	0.91488	0.834048	0.846749	0.852997	0.889727	0.910948	0.949179	0.846121	0.830182	0.807767	0.808439	0.770224	0.763712
2024	11	21	14	52	23	No Data	No Data	No Data	No Data	No Data	No Data	No Data	1.01883	1.16423	1.40074	1.36016	1.32558	1.42057	1.61413	1.69936	1.75785	1.7976	1.78699	1.78928	1.812	1.72346	1.6064	1.62326	1.63865	1.61698	1.63011	1.61413	1.53787	1.46035
2024	11	27	14	3	41	0.633462	0.614023	0.672254	0.654238	0.712042	0.635578	0.720195	0.673237	0.765038	1.02032	1.40868	1.56382	1.56701	1.53393	1.42388	1.33428	1.38732	1.50333	1.56925	1.61742	1.56478	1.44876	1.36416	1.31979	1.27194	1.16816	1.03952	0.972661	0.878614
2024	11	29	14	51	56	0.981433	0.988357	1.02141	1.04175	1.39783	1.49409	1.50449	1.55932	1.6773	1.77845	1.83404	1.89414	1.96095	1.89659	2.00435	1.97537	1.97892	2.00534	1.93942	1.64672	1.18815	1.09761	1.09716	0.999907	0.996254	0.913664	0.907665	0.907062	0.907062
2024	12	2	14	49	33	1.0166	1.03634	1.07756	1.14346	1.28174	1.32371	1.32767	1.36549	1.37554	1.26161	1.18514	1.262	1.32695	1.35291	1.32623	1.23632	1.11514	0.99245	0.97415	1.03068	1.06784	1.18388	1.2723	1.27722	1.19761	1.18136	1.07563	0.907122	0.522124
2024	12	3	14	5	28	0.67482	0.813647	1.08898	1.09046	1.04847	1.10119	1.14262	1.19493	1.20389	1.17097	1.29397	1.34695	1.41612	1.45349	1.47571	1.48571	1.4562	1.53075	1.41889	1.43475	1.19105	0.854822	0.740437	0.798973	0.786311	0.769243	0.756721	0.779871	0.776623
2024	12	4	14	47	7	0.332133	0.283425	0.229068	0.304335	0.393555	0.360211	0.398614	0.85984	1.03036	1.23476	1.2977	1.4603	1.43131	1.412	1.38825	1.35767	1.25385	0.917673	0.857071	0.793303	0.750578	0.758897	0.832991	0.710578	0.678006	0.676083	0.702391	0.693145	0.59267
2024	12	7	14	50	59	0.688727	0.764169	0.746272	0.72691	0.72691	0.729475	0.815361	0.864322	0.974338	1.1895	0.965315	0.831203	0.743785	0.845234	0.836857	0.875614	0.963038	1.05436	1.05287	0.956737	0.760958	0.710373	No Data	No Data	No Data	No Data	No Data	No Data	No Data
2024	12	10	14	11	58	0.377016	0.49436	0.481509	0.48869	0.578447	0.516412	0.637965	0.586717	0.625081	0.671834	0.550281	0.547756	0.626167	0.577255	0.653633	0.568828	0.615202	0.612981	0.669842	0.568828	0.5937	0.598302	0.637965	0.798693	0.692301	0.721144	0.670839	0.540103	0.630489
2024	12	12	14	47	12	1.22697	1.39229	1.44631	1.52566	1.50454	1.54813	1.56887	1.55279	1.5698	1.61727	1.60263	1.64188	1.56022	1.48832	1.42554	1.36688	1.26288	1.18286	1.11915	1.13178	1.12278	1.09793	1.03329	1.04145	1.10862	1.06292	1.06684	0.942619	0.771418
2024	12	13	14	49	19	0.287449	0.322846	0.233388	0.110722	0.374834	0.361051	0.299546	0.315207	0.563796	0.421719	0.674456	0.910045	0.930493	1.08258	1.18802	1.1382	1.09145	1.22996	1.38883	1.4501	1.43203	1.32944	1.21064	1.0109	0.82679	0.772845	0.669779	0.542569	0.364534
2024	12	15	14	7	34	No Data	No Data	No Data	No Data	No Data	No Data	No Data	No Data	0.882036	0.781366	0.856708	0.991739	2.0676	2.11298	2.15876	1.99643	1.93755	1.77442	1.67596	1.64676	1.53677	1.46897	1.49439	1.64293	1.72283	1.65963	1.55679	1.52635	1.46636
2024	12	16	14	46	32	0.420067	0.399561	0.404371	0.460068	0.460068	0.536327	1.07221	1.49247	1.69144	1.76575	1.77561	1.75739	1.81924	1.76127	1.73804	1.72556	1.59252	1.4045	1.2985	1.26121	1.20092	1.16343	1.15539	1.04947	1.07316	1.03856	1.00788	0.928938	0.904772
2024	12	17	14	8	32	0.339758	0.339758	0.376781	0.380723	0.676915	1.19453	1.3247	1.09288	1.0681	1.3358	1.57133	1.83598	1.91781	1.75621	1.54684	1.63825	1.90125	1.75621	1.74682	1.66221	1.59493	1.6079	1.41799	1.26252	1.18594	1.03599	1.02772	1.06417	0.808075
2024	12	21	14	49	23	0.585878	0.57374	0.574967	0.690755	0.733105	0.711879	0.89324	0.745629	0.788968	0.954794	1.48196	1.27112	1.24574	1.21964	1.2474	1.32496	1.40843	1.52675	1.6198	1.62756	1.60198	1.61106	1.6198	1.14318	0.558779	0.523392	0.45969	0.467359	0.474909
2024	12	25	14	49	25	0.535683	0.440247	0.451296	0.504481	0.49315	0.539612	0.691824	1.10583	1.11796	1.15415	1.20226	1.24201	1.17856	1.08247	1.05831	1.01903	1.00447	0.945195	0.908716	0.8734	0.726557	0.656732	0.659833	0.64094	0.692793	0.608972	0.543511	0.612373	0.599791
2024	12	27	14	3	45	0.249479	0.339153	0.372353	0.368327	0.254651	0.427218	0.418194	0.366302	0.493954	0.487675	0.528585	0.632082	0.9281	1.04256	1.02422	0.945956	1.02721	0.90827	0.874966	0.873442	0.987226	0.989126	0.824921	0.685025	0.672008	0.591383	0.521259	0.538663	0.43783
2024	12	29	14	48	11	0.599256	0.575976	0.650766	0.627709	0.68676	0.761016	0.743181	0.90027	0.895876	0.889542	0.903389	0.883784	0.731519	0.616307	0.534618	0.451667	0.51579	0.451667	0.519613	0.50414	0.497547	0.458901	0.471659	0.456021	0.374389	0.381184	0.40744	0.402626	0.405841
