# Supplementary material for: Delayed, long-lived and globally-significant impacts of ocean-entering lahars
Source: Research Square preprint supplement (doi:10.21203/rs.3.rs-8432480/v1), 2026-01-16
Supplement: Supplementary file 2 [file e99035e7951fe5e4524283e1.xlsx]

## Sheet: Maximum turbidity  
Year	Month	Day	Hour	Minute	Second	Maximum Turbidity Along Transect [FNU]
2016	9	3	13	45	5	7.56
2016	9	21	11	0	47	3.46
2016	11	8	13	47	4	37.56
2016	11	26	13	47	28	7.33
2017	2	19	13	50	49	4.07
2017	2	22	13	50	36	7.12
2017	3	11	13	43	9	11.96
2017	4	7	13	51	37	11.87
2017	4	23	13	45	11	7.27
2017	4	25	13	52	2	4.42
2017	4	27	13	51	40	9.86
2017	5	10	13	45	45	4.41
2017	6	1	13	47	11	10.59
2017	6	22	20	14	23	1.79
2017	6	27	13	47	46	10.23
2017	7	5	13	53	29	6.26
2017	7	6	13	47	44	9.22
2017	7	8	13	49	24	7.81
2017	7	10	13	48	16	7.08
2017	7	28	13	50	0	10.71
2017	7	30	13	48	33	2.02
2017	8	21	13	52	11	8.15
2017	8	27	13	49	48	3.65
2017	9	4	13	52	6	3.07
2017	9	10	13	50	6	3.87
2017	9	14	13	51	33	14.04
2017	9	17	13	51	56	8.08
2017	10	5	13	53	8	9.66
2017	10	6	13	53	59	8.84
2017	10	9	13	54	3	29.41
2017	10	12	13	52	37	4.56
2017	10	13	13	55	37	4.44
2017	10	20	15	12	22	14.19
2017	10	21	13	54	27	15.35
2017	11	2	13	54	6	2.56
2017	11	8	15	9	18	7.28
2017	11	9	13	53	47	5.65
2017	11	20	13	54	44	4.61
2017	11	25	13	54	22	3.37
2017	11	28	13	54	41	3.22
2017	11	29	13	55	53	4.47
2017	12	3	13	55	25	6.93
2017	12	10	13	56	49	3.45
2017	12	14	13	56	34	4.85
2017	12	21	13	55	38	4.69
2018	1	2	13	56	47	6.08
2018	1	4	15	0	22	2.27
2018	1	23	14	56	29	4.34
2018	1	31	14	55	30	10.12
2018	2	1	14	55	48	5.01
2018	2	2	13	57	52	3.09
2018	2	3	13	57	56	5.3
2018	2	9	13	58	10	4.02
2018	2	10	13	58	57	5.81
2018	2	21	13	58	32	5.77
2018	2	27	13	59	4	5.63
2018	3	1	13	59	19	4.55
2018	3	10	13	58	35	6.38
2018	3	18	13	59	55	3.49
2018	3	19	13	59	56	3.46
2018	3	30	14	0	18	6.58
2018	4	13	14	0	32	6.32
2018	5	2	14	1	4	3.34
2018	5	12	14	2	3	15.32
2018	5	16	14	1	21	8.02
2018	6	6	14	3	15	16.04
2018	6	7	14	2	38	9.19
2018	6	12	14	2	31	22.07
2018	7	22	14	4	39	12.27
2018	7	23	14	4	21	7.28
2018	9	1	14	5	13	9.31
2018	9	10	14	6	8	2.87
2018	9	11	14	5	33	3.88
2018	9	15	14	6	7	3.42
2018	9	22	14	5	59	5.67
2018	10	6	14	6	19	7.15
2018	10	15	14	6	30	3.82
2018	10	26	14	16	46	3.58
2018	11	5	14	15	28	2.93
2018	11	17	14	7	57	3.84
2018	11	29	14	12	36	4.06
2018	12	11	14	7	29	3.29
2018	12	15	14	8	30	4.77
2018	12	29	14	9	23	6.01
2019	1	3	14	9	18	4.24
2019	1	4	14	8	34	4.31
2019	1	7	14	10	24	4.92
2019	1	8	14	10	8	3.18
2019	1	13	14	9	7	3.34
2019	1	26	14	5	52	5.44
2019	2	3	14	8	8	2.7
2019	2	4	14	10	36	1.97
2019	2	15	14	10	31	5.03
2019	2	17	14	10	21	3.8
2019	3	2	15	17	2	7.97
2019	3	18	13	57	3	29.73
2019	3	20	14	9	55	5.46
2019	3	21	13	54	47	2.91
2019	4	22	14	10	33	10.36
2019	4	27	14	8	56	8.53
2019	4	29	14	10	38	12.98
2019	5	15	13	47	51	6.47
2019	5	21	13	44	48	7.27
2019	5	23	13	45	12	4.77
2019	5	30	13	44	50	7.37
2019	7	10	14	11	27	11.88
2019	7	11	13	38	28	6.45
2019	7	14	14	5	55	20.08
2019	7	25	13	36	8	2.41
2019	8	20	14	12	42	5.01
2019	8	21	14	13	6	3.56
2019	8	26	14	13	9	7.72
2019	9	4	13	30	42	4.22
2019	9	7	13	27	58	2.66
2019	9	12	14	13	51	7.76
2019	9	20	14	15	37	32.83
2019	9	24	13	26	16	4.09
2019	9	26	13	25	44	2.43
2019	10	9	14	6	0	4.68
2019	10	12	13	23	13	3.63
2019	10	14	14	15	40	5.61
2019	10	15	14	15	35	6.17
2019	10	19	14	12	55	3.2
2019	10	20	14	14	34	3.37
2019	10	26	14	15	51	4.5
2019	10	28	14	12	46	6.91
2019	11	8	13	19	27	4.32
2019	11	11	15	4	18	5.94
2019	11	17	14	14	47	3.79
2019	11	29	14	16	57	5.85
2019	12	16	14	15	9	6.59
2019	12	25	13	11	55	4.66
2020	1	4	14	16	4	4.12
2020	1	7	14	15	34	4.58
2020	1	19	14	14	9	5.94
2020	1	20	13	7	15	11.71
2020	1	25	14	14	56	5.48
2020	1	29	14	14	36	3.11
2020	1	30	14	38	21	1.84
2020	2	3	14	33	11	4.64
2020	2	4	14	14	27	5.11
2020	2	20	13	0	59	3.26
2020	2	22	13	2	8	3.94
2020	2	25	13	2	57	2.09
2020	2	27	14	56	14	3.73
2020	3	10	14	15	20	9.03
2020	3	11	14	16	57	10.32
2020	3	15	14	39	31	7.1
2020	3	30	12	57	39	3.22
2020	4	1	12	54	24	2.53
2020	4	20	12	52	46	2.42
2020	5	10	13	49	28	29.46
2020	5	14	12	48	32	2.31
2020	5	18	12	47	10	12.09
2020	5	21	13	47	8	7.57
2020	6	19	14	44	4	16.08
2020	7	19	14	14	58	15.94
2020	7	23	14	43	25	16.46
2020	7	26	13	51	14	9.14
2020	8	3	14	44	53	21.08
2020	8	6	14	16	2	7.21
2020	8	21	14	15	41	10.13
2020	8	26	12	29	47	8.47
2020	8	28	14	3	2	38.37
2020	9	1	14	1	0	3.27
2020	9	5	13	50	4	90.48
2020	9	6	12	30	8	6.1
2020	9	10	12	27	55	4.51
2020	9	11	14	14	8	3.42
2020	9	16	12	26	47	7.4
2020	9	17	12	27	35	5.34
2020	9	22	14	30	17	1.9
2020	9	23	14	16	30	23.22
2020	10	10	12	23	27	14.92
2020	10	12	14	15	43	6.68
2020	10	14	13	51	4	5.53
2020	10	15	14	45	32	4.97
2020	10	19	12	20	51	5.6
2020	10	21	14	45	56	8.02
2020	10	27	14	25	58	4.86
2020	11	22	12	18	24	10.32
2020	11	23	14	15	9	4.04
2020	11	27	13	52	27	6.35
2020	12	1	14	52	0	4.03
2020	12	11	14	42	16	4.25
2020	12	12	14	13	10	4.71
2020	12	23	14	13	55	6.71
2020	12	30	14	52	6	2.33
2021	1	15	14	15	27	85.41
2021	1	19	13	54	58	10.39
2021	1	22	14	13	13	4.49
2021	2	5	14	13	36	5.54
2021	2	6	14	16	58	11.42
2021	2	23	14	12	42	9.46
2021	3	6	14	35	44	4.73
2021	3	16	14	37	50	6.44
2021	4	13	14	15	57	53.88
2021	4	22	13	58	11	108.74
2021	4	23	14	34	35	41.17
2021	4	25	13	48	28	74.71
2021	4	26	13	47	55	79.28
2021	5	2	14	15	11	117.93
2021	5	4	13	47	41	107.53
2021	5	7	13	46	57	25.33
2021	5	13	14	36	17	137.19
2021	5	19	11	46	22	24.37
2021	5	27	14	13	36	21.02
2021	5	28	11	44	36	16.45
2021	6	3	13	47	14	94.04
2021	6	13	13	46	50	19.92
2021	6	24	13	47	42	81.97
2021	6	27	13	46	34	66.8
2021	6	28	13	46	26	98.85
2021	6	29	11	39	13	24.1
2021	7	4	14	36	41	140.02
2021	7	5	14	35	48	227.77
2021	7	7	13	45	56	74.76
2021	7	14	14	11	50	117.81
2021	7	15	13	45	26	34.13
2021	7	16	14	12	38	49.25
2021	7	19	14	22	36	55.72
2021	7	20	14	34	49	44.42
2021	7	27	14	13	11	32.73
2021	7	28	13	46	32	14.44
2021	8	1	13	46	51	51.16
2021	8	2	14	11	6	32.07
2021	8	3	11	33	55	89.32
2021	8	6	14	34	19	43.34
2021	8	9	14	13	13	60.39
2021	8	11	14	10	47	24.17
2021	8	25	13	44	4	60.85
2021	8	29	13	45	59	78.42
2021	8	30	14	12	21	26.84
2021	9	1	11	29	21	42.36
2021	9	3	14	13	28	50.99
2021	9	5	13	58	1	52.56
2021	9	7	13	44	34	18.96
2021	9	12	14	33	48	31.86
2021	9	16	14	23	38	34.74
2021	9	17	14	24	4	17.75
2021	9	19	13	43	58	8.82
2021	9	21	13	46	32	7.59
2021	9	22	13	48	19	9.32
2021	9	23	13	57	52	5.16
2021	9	25	14	32	59	7.26
2021	9	28	13	59	23	10.14
2021	9	29	14	33	56	26.99
2021	9	30	14	11	55	6.13
2021	10	11	13	55	16	64.96
2021	10	13	15	3	48	58.06
2021	10	16	13	44	5	34.62
2021	10	17	14	24	37	3.28
2021	10	20	14	33	33	11.11
2021	10	23	14	34	21	21.54
2021	10	24	14	29	54	29.13
2021	10	28	13	45	34	7.3
2021	10	29	13	55	58	18.78
2021	10	30	13	46	26	14.42
2021	11	2	14	10	7	28.29
2021	11	3	13	44	31	29.53
2021	11	4	14	8	19	27
2021	11	6	13	43	50	44.05
2021	11	8	14	32	23	8.24
2021	11	11	15	6	9	29.92
2021	11	13	15	8	22	32.46
2021	11	19	13	43	46	26.56
2021	11	23	14	12	36	19.31
2021	11	26	13	46	24	6.42
2021	11	28	13	43	32	60.36
2021	12	6	14	15	18	15.55
2021	12	9	14	12	30	25.77
2021	12	11	13	42	45	14.47
2021	12	12	13	44	13	45.7
2021	12	22	13	43	46	10.73
2021	12	25	13	43	20	49.93
2021	12	26	14	28	42	27.67
2021	12	29	13	45	26	5.64
2021	12	31	13	55	39	14.35
2022	1	7	14	8	55	16.99
2022	1	11	14	32	53	40.86
2022	1	21	15	11	29	7.37
2022	1	23	14	32	45	4.11
2022	1	30	14	9	58	22.48
2022	2	2	14	8	18	5.61
2022	2	3	14	10	38	7.26
2022	2	4	14	31	22	6.1
2022	2	5	13	44	47	8.22
2022	2	6	14	6	28	12.04
2022	2	10	13	40	9	2.35
2022	2	19	14	32	10	4.3
2022	2	20	14	32	12	59.31
2022	2	22	14	28	2	10.33
2022	2	24	14	8	20	7.78
2022	3	2	13	42	42	13.96
2022	3	4	13	41	34	5.34
2022	3	9	13	38	39	8.78
2022	3	21	14	31	24	9
2022	3	26	13	39	5	7.01
2022	3	28	14	10	0	4.74
2022	4	4	13	39	48	10.22
2022	4	10	13	53	3	8.46
2022	4	21	13	36	9	10.37
2022	4	23	14	10	37	5.83
2022	4	24	13	39	0	7.94
2022	5	1	13	40	12	5.85
2022	5	30	14	9	52	5.84
2022	6	4	14	11	16	25.57
2022	6	23	14	10	53	19.78
2022	6	25	13	40	52	13.85
2022	7	14	14	22	48	20.17
2022	7	24	14	10	37	6.9
2022	7	28	13	40	38	24.33
2022	7	30	14	20	42	11.26
2022	8	5	13	36	26	56.1
2022	8	16	14	10	13	6.2
2022	8	19	13	36	46	5.19
2022	8	24	14	28	38	130.24
2022	9	1	14	27	25	11.52
2022	9	5	14	13	10	124.3
2022	9	8	13	38	23	119.95
2022	9	9	13	37	33	57.89
2022	9	10	13	39	51	25.88
2022	9	11	13	35	46	29.19
2022	9	13	14	27	5	292.5
2022	9	15	13	39	11	30.43
2022	9	19	14	14	11	112.13
2022	9	20	13	39	23	85.46
2022	9	25	13	38	36	7.87
2022	10	2	13	56	28	157.07
2022	10	17	13	56	52	45.11
2022	10	21	14	14	8	92.33
2022	10	22	14	14	7	183.85
2022	10	31	14	12	53	208.73
2022	11	6	14	27	0	58.6
2022	11	7	13	39	3	90.81
2022	11	12	13	40	34	29.6
2022	11	14	13	35	28	22.02
2022	11	17	13	37	16	10.03
2022	11	18	14	11	26	12.87
2022	11	26	14	13	57	21.29
2022	11	30	14	10	15	4.54
2022	12	4	14	29	33	5.61
2022	12	8	13	37	1	8.46
2022	12	17	14	14	38	7.55
2022	12	19	14	11	10	5.83
2022	12	27	14	12	54	4.84
2023	1	12	14	12	49	3.05
2023	1	18	13	35	40	3.89
2023	1	25	14	25	11	7.17
2023	1	29	13	36	23	6.24
2023	2	6	14	19	23	8.18
2023	2	13	13	33	8	3.08
2023	2	14	13	40	24	5.12
2023	2	15	13	32	48	2.53
2023	2	20	13	37	48	5.09
2023	2	22	13	41	13	16.79
2023	2	25	13	35	53	4.03
2023	3	5	14	13	48	9.71
2023	3	9	14	12	26	5.93
2023	3	11	13	43	55	19.6
2023	3	16	13	39	29	5.03
2023	3	17	14	15	57	23.43
2023	3	31	13	35	44	5.98
2023	4	3	14	12	15	23.09
2023	4	4	13	36	22	23.58
2023	4	6	13	35	8	10.9
2023	4	12	14	11	47	6.81
2023	4	15	14	3	5	11.52
2023	4	18	13	37	14	13.07
2023	4	21	14	6	11	11.71
2023	4	23	13	43	16	7.3
2023	4	30	13	41	13	19.36
2023	5	1	13	36	17	14.2
2023	5	14	13	36	7	4.86
2023	5	19	14	13	59	13.2
2023	5	26	14	6	38	15.37
2023	5	28	13	38	0	17.47
2023	6	19	14	16	56	7.19
2023	6	26	13	43	42	42.02
2023	6	29	13	42	39	126.37
2023	7	5	13	43	53	37.56
2023	7	6	13	45	12	69.5
2023	7	16	13	42	59	11.77
2023	7	17	13	45	19	18.14
2023	7	21	14	17	39	18.48
2023	7	22	14	17	3	23.76
2023	7	23	13	43	10	40.45
2023	7	26	14	21	43	298.37
2023	7	28	14	18	25	96.38
2023	7	31	13	22	21	67.77
2023	8	2	13	42	22	19.13
2023	8	15	13	45	22	27.27
2023	8	21	13	45	30	124.41
2023	8	24	14	19	51	48.11
2023	8	26	14	23	42	43.21
2023	9	3	14	22	12	66.99
2023	9	6	13	46	0	54.62
2023	9	10	13	42	30	14.29
2023	9	12	13	45	35	12.56
2023	9	13	13	43	59	8.25
2023	9	14	13	43	24	6.95
2023	9	24	14	24	24	143.01
2023	10	4	14	45	55	45.75
2023	10	6	14	23	35	58.22
2023	10	7	14	25	57	113.18
2023	10	8	13	45	20	41.93
2023	10	18	13	41	34	2.44
2023	10	23	13	43	44	75.2
2023	10	28	13	42	53	62.7
2023	10	30	13	40	47	98.76
2023	11	1	13	45	54	36.87
2023	11	5	14	25	50	66.3
2023	11	14	13	48	21	27.33
2023	11	15	13	41	46	12.31
2023	11	19	13	47	4	14.59
2023	11	20	13	44	48	15.28
2023	11	21	13	46	9	16.28
2023	11	26	14	27	26	3.98
2023	12	1	13	47	56	36.53
2023	12	3	13	45	33	2.44
2023	12	14	14	28	14	15.04
2023	12	17	13	47	54	73.2
2023	12	21	14	29	12	2.81
2023	12	24	14	28	22	10.52
2023	12	26	14	27	38	4.13
2023	12	28	14	28	7	2.26
2023	12	30	13	44	4	3.05
2024	1	2	13	45	45	5.45
2024	1	5	14	29	36	2.85
2024	1	10	13	47	54	4.39
2024	1	14	14	32	4	2.55
2024	1	15	13	48	23	4.76
2024	1	29	13	45	49	22.84
2024	1	30	13	46	14	13.05
2024	1	31	13	53	14	9.72
2024	2	4	13	46	1	5.96
2024	2	11	14	28	29	7.46
2024	2	12	14	36	0	12.86
2024	2	17	13	47	31	6.79
2024	2	22	14	36	6	7.15
2024	2	27	13	47	4	6.26
2024	3	8	13	52	3	7.69
2024	3	13	14	42	51	11.8
2024	3	20	13	49	16	6.85
2024	3	21	13	48	14	5.16
2024	3	25	13	52	27	6.93
2024	3	27	13	50	51	5.03
2024	3	28	14	42	33	7.2
2024	4	1	13	52	14	13.15
2024	4	6	13	52	32	9.53
2024	4	7	14	41	12	9.64
2024	4	9	14	39	29	11.21
2024	4	12	13	51	17	18.49
2024	4	15	13	52	14	8.1
2024	4	21	13	52	44	33.26
2024	4	22	13	51	12	59.21
2024	4	24	13	50	30	47.86
2024	4	25	13	50	40	56.1
2024	4	26	13	52	8	172.93
2024	4	28	13	53	23	16.7
2024	4	29	14	42	50	35.3
2024	5	9	13	52	35	20.79
2024	5	18	13	50	8	76.46
2024	5	30	13	55	24	136.11
2024	6	12	13	52	11	10.37
2024	6	15	13	53	38	21.38
2024	6	16	14	7	51	10.56
2024	6	19	14	1	12	12.7
2024	6	28	14	49	36	9.47
2024	7	2	14	52	0	59.79
2024	7	14	14	55	14	37.6
2024	7	18	14	44	45	227.22
2024	7	31	14	44	3	7.28
2024	8	16	13	56	16	6.54
2024	8	17	13	55	44	3.94
2024	8	20	14	45	21	18.54
2024	8	28	13	57	30	46.99
2024	9	22	14	44	34	9.79
2024	9	28	14	49	19	8
2024	10	1	14	45	49	26.18
2024	10	5	14	47	1	15.56
2024	10	6	14	44	59	8.53
2024	10	8	13	59	43	40.83
2024	10	11	14	46	45	18.77
2024	10	17	13	59	50	10.24
2024	10	30	14	48	44	4.9
2024	11	13	14	48	26	27.59
2024	11	15	14	46	44	12.99
2024	11	16	14	51	44	9.55
2024	11	21	14	52	23	64.86
2024	11	27	14	3	41	41.44
2024	11	29	14	51	56	101.24
2024	12	2	14	49	33	23.74
2024	12	3	14	5	28	33.94
2024	12	4	14	47	7	28.86
2024	12	7	14	50	59	15.47
2024	12	10	14	11	58	6.29
2024	12	12	14	47	12	43.84
2024	12	13	14	49	19	28.19
2024	12	15	14	7	34	144.13
2024	12	16	14	46	32	65.95
2024	12	17	14	8	32	82.76
2024	12	21	14	49	23	42.42
2024	12	25	14	49	25	17.46
2024	12	27	14	3	45	11.03
2024	12	29	14	48	11	8.01
